# Supplementary material
Source: Elsevier journal article supplement (https://www.sciencedirect.com/science/article/pii/S253006442030016X)
Supplement: mmc1 [file S253006442030016X:mmc1.docx]

**Multiple dimensions of climate change on the distribution of Amazon primates -** Sales et al.

**Supporting information**

**Tables**

Table S2. Predicted variation in potential distribution of Amazon primates, as consequence of climate change and deforestation. Values are the percent variation in the area predicted as suitable, in number of cells, calculated as . Positive values indicate are for area expansion, while negative values represent area reduction. Asterisks indicate that models did not converge.

| Species binomial | Climate change | |  | Climate change + deforestation | |
| --- | --- | --- | --- | --- | --- |
|  | Mitigation | BAU |  | Mitigation | BAU |
| *Alouatta discolor* | 0.98 | 30.7 |  | -21.24 | -55.43 |
| *Alouatta nigerrima* | 179.9 | 130.66 |  | 157.38 | -46.77 |
| *Alouatta sara* | 37.77 | 46 |  | -8.68 | -20.42 |
| *Alouatta seniculus* | 24.92 | 52.76 |  | -13.15 | -35.75 |
| *Aotus azarae* | 29.29 | 40.02 |  | -5.26 | -19.84 |
| *Aotus miconax* | 110.42 | 83.98 |  | 41.12 | 16.8 |
| *Aotus nancymaae* | 33.1 | 35.07 |  | 20.78 | 16.1 |
| *Aotus nigriceps* | 32.3 | 39.17 |  | -4.91 | -37.35 |
| *Aotus vociferans* | 17.15 | 23.44 |  | 11.91 | 15.54 |
| *Ateles belzebuth* | 56.86 | 88.43 |  | 50.67 | 73.81 |
| *Ateles chamek* | 0.17 | 8.16 |  | -22.43 | -40.08 |
| *Ateles marginatus* | -8.66 | -2.17 |  | -28.92 | -65.7 |
| *Ateles paniscus* | 36.42 | -18.74 |  | -3.08 | -48.42 |
| *Cacajao calvus* | 250.66 | 269.14 |  | 231.03 | 231.38 |
| *Cacajao hosomi* | 579.28 | -57.07 |  | 566.94 | -74.34 |
| *Callibella humilis* | -100 | -15.94 |  | -100 | -31.88 |
| *Callimico goeldii* | 27.72 | 50.16 |  | 16.12 | 30.75 |
| *Cebuella pygmaea* | 24.38 | 32.97 |  | 13.58 | 5.67 |
| *Cebus albifrons* | 55.41 | 81.05 |  | 31.7 | 49.6 |
| *Cebus kaapori* | -59.7 | -30.08 |  | -85.54 | -84.9 |
| *Cheracebus lucifer* | 25.7 | 105.36 |  | 23.13 | 98.47 |
| *Cheracebus medemi* | 470.81 | 355.9 |  | 394.41 | 297.52 |
| *Cheracebus purinus* | 240.32 | 331.04 |  | 186.48 | 135.28 |
| *Cheracebus regulus* | -2.04 | 37.58 |  | -3.81 | 25.5 |
| *Cheracebus torquatus* | 56.3 | 23.53 |  | 58.58 | 4.55 |
| *Chiropotes albinasus* | 12.44 | 10.86 |  | 2.96 | -62.79 |
| *Chiropotes satanas* | -49.35 | -7.56 |  | -76.67 | -73.19 |
| *Chiropotes utahickae* | -89.49 | -73.47 |  | -92.88 | -98.61 |
| *Lagothrix cana* | 76.45 | 74.24 |  | 13.23 | -17.7 |
| *Lagothrix flavicauda* | 53.76 | 9.77 |  | -4.14 | -55.26 |
| *Lagothrix lagotricha* | 9.57 | 34.6 |  | 2.93 | 23.36 |
| *Lagothrix poeppigii* | 25.14 | 17.44 |  | 15.55 | 3.49 |
| *Mico acariensis* | 543.52 | 538.89 |  | 264.81 | -33.8 |
| *Mico argentatus* | -100 | -35.84 |  | -100 | -100 |
| *Mico chrysoleucos* | 137.53 | -28.61 |  | 99.48 | -84.78 |
| *Mico emiliae* | -11.19 | 47.39 |  | -22.3 | -39.83 |
| *Mico humeralifer* | 122.81 | -98.64 |  | 413.84 | -99.42 |
| *Mico intermedius* | -68.35 | 11.99 |  | -68.73 | -48.31 |
| *Mico leucippe* | 110.87 | -71.74 |  | 76.81 | -94.2 |
| *Mico marcai* | -100 | 1.43 |  | -100 | -98.57 |
| *Mico mauesi* | 1935.88 | 1003.32 |  | 955.15 | -91.69 |
| *Mico melanurus* | -26.56 | -19.15 |  | -31.49 | -34.2 |
| *Mico nigriceps* | 32.25 | 57.97 |  | -18.48 | -47.46 |
| *Mico rondoni* | -93.87 | 61.5 |  | -100 | -88.59 |
| *Mico saterei* | 441.03 | 128.72 |  | 285.64 | -27.18 |
| *Pithecia aequatorialis* | 62.29 | 81.24 |  | 37.02 | 68.61 |
| *Pithecia albicans* | 172.88 | 284.87 |  | 111.25 | 14.39 |
| *Pithecia pithecia* | 60.75 | 21.9 |  | 12.31 | -41.44 |
| *Plecturocebus aureipalatii* | 67.65 | 116.18 |  | -0.98 | 14.71 |
| *Plecturocebus baptista* | -97.74 | -100 |  | -85.88 | -95.48 |
| *Plecturocebus bernhardi* | -52.47 | 17.09 |  | -70.75 | -73.02 |
| *Plecturocebus brunneus* | 55.93 | 81.34 |  | 13.75 | -58.38 |
| *Plecturocebus caligatus* | 1.51 | -66 |  | -23.28 | -97.32 |
| *Plecturocebus caquetensis* | 22.22 | 133.33 |  | -100 | -100 |
| *Plecturocebus cinerascens* | 127.07 | 152.3 |  | 43.22 | -62 |
| *Plecturocebus cupreus* | -9.23 | 8.05 |  | -16.11 | -12.43 |
| *Plecturocebus discolor* | 39.04 | 31.19 |  | 24.05 | 19.93 |
| *Plecturocebus donacophilus* | 0.23 | 1.22 |  | -13.84 | -21.9 |
| *Plecturocebus dubius* | 65.46 | 49.1 |  | 37.39 | -26.55 |
| *Plecturocebus hoffmannsi* | 733.05 | 404.34 |  | 439.2 | -78.65 |
| *Plecturocebus modestus* | -65.75 | -100 |  | -65.75 | -100 |
| *Plecturocebus moloch* | -53.86 | -42.27 |  | -62.87 | -77.08 |
| *Plecturocebus oenanthe* | -48.42 | -72.63 |  | -96.84 | -98.95 |
| *Plecturocebus olallae** | NA | NA |  | NA | NA |
| *Plecturocebus stephennashi* | 118.45 | 77.99 |  | 111.33 | -40.45 |
| *Saguinus bicolor* | -19.8 | 16.83 |  | -71.29 | -27.72 |
| *Saguinus fuscicollis* | 40.37 | 61.33 |  | 25.67 | 15.48 |
| *Saguinus imperator* | 38.06 | 26 |  | 19.63 | -22.27 |
| *Saguinus inustus* | 33.55 | 67.42 |  | 32.82 | 59.02 |
| *Saguinus labiatus* | 383.91 | 448.8 |  | 303.67 | 136.25 |
| *Saguinus martinsi* | 9.92 | 45.73 |  | -40.77 | -75.21 |
| *Saguinus melanoleucus* | 124.95 | 92.87 |  | 99.8 | 28.71 |
| *Saguinus midas* | 38.28 | -20.14 |  | 2.79 | -53.17 |
| *Saguinus mystax* | 25.58 | 35.38 |  | 15.75 | 9.09 |
| *Saguinus niger* | -27.92 | 9.29 |  | -76.12 | -80.17 |
| *Saguinus nigricollis* | 350.19 | 382.21 |  | 321.35 | 348.65 |
| *Saguinus tripartitus* | 107.66 | 22.13 |  | 104.26 | 20.43 |
| *Saimiri boliviensis* | 21.38 | 17.74 |  | 5.57 | -13.71 |
| *Saimiri sciureus* | 8.82 | 2.43 |  | -7.37 | -34.63 |
| *Saimiri ustus* | 27.86 | 38.97 |  | -25.54 | -66.91 |
| *Saimiri vanzolinii* | -100 | -93.75 |  | -100 | -90.62 |
| *Sapajus apella* | 0.01 | 4.06 |  | -27.73 | -49.91 |

Table S2. Dispersal abilities and biotic velocity of Amazon primates. Potential dispersal abilities (km/yr) were modeled as function of modeled as a function of body mass, diet type, and the successive time between generations and obtained from Schloss *et al.* (2012). Biotic velocity is the velocity at which core populations would have to move to maintain constant environmental conditions (km/yr).

| Species binomial | Dispersal |  | Climate-only | |  | Climate change + deforestation | |
| --- | --- | --- | --- | --- | --- | --- | --- |
|  |  |  | Mitigation | BAU |  | Mitigation | BAU |
| *Alouatta discolor* | 0.88 |  | 2.20 | 2.67 |  | 2.26 | 3.19 |
| *Alouatta nigerrima* | 0.88 |  | 2.12 | 3.01 |  | 2.42 | 1.50 |
| *Alouatta sara* | 0.88 |  | 2.43 | 2.50 |  | 1.65 | 0.76 |
| *Aotus azarae* | 0.69 |  | 1.95 | 1.12 |  | 2.76 | 3.75 |
| *Aotus miconax* | 0.69 |  | 0.07 | 0.09 |  | 0.65 | 0.54 |
| *Aotus nancymaae* | 0.69 |  | 1.13 | 0.74 |  | 0.71 | 0.69 |
| *Aotus nigriceps* | 0.69 |  | 3.09 | 2.67 |  | 2.61 | 3.38 |
| *Aotus vociferans* | 0.69 |  | 0.64 | 0.63 |  | 1.01 | 1.04 |
| *Ateles belzebuth* | 1.05 |  | 1.29 | 1.33 |  | 1.31 | 1.41 |
| *Ateles chamek* | 1.05 |  | 1.85 | 2.12 |  | 2.09 | 1.85 |
| *Ateles marginatus* | 1.05 |  | 2.83 | 3.42 |  | 2.19 | 2.43 |
| *Ateles paniscus* | 1.05 |  | 3.20 | 1.80 |  | 1.37 | 3.21 |
| *Cacajao calvus* | 0.93 |  | 2.13 | 2.40 |  | 2.28 | 2.91 |
| *Cacajao hosomi* | 0.93 |  | 4.09 | 0.63 |  | 4.22 | 0.13 |
| *Callibella humilis* | 0.26 |  | 19.88 | 0.90 |  | 19.84 | 0.89 |
| *Callimico goeldii* | 0.26 |  | 2.86 | 1.52 |  | 2.90 | 2.12 |
| *Cebuella pygmaea* | 0.26 |  | 2.21 | 2.73 |  | 2.41 | 2.77 |
| *Cebus albifrons* | 0.64 |  | 1.59 | 1.79 |  | 1.39 | 1.92 |
| *Cebus kaapori* | 0.66 |  | 2.41 | 1.73 |  | 3.69 | 3.60 |
| *Cheracebus lucifer* | 0.53 |  | 2.55 | 0.92 |  | 2.49 | 0.82 |
| *Cheracebus medemi* | 0.55 |  | 4.09 | 4.08 |  | 4.55 | 4.69 |
| *Cheracebus purinus* | 0.56 |  | 3.88 | 4.09 |  | 2.98 | 1.78 |
| *Cheracebus regulus* | 0.57 |  | 2.80 | 1.01 |  | 2.79 | 0.76 |
| *Cheracebus torquatus* | 0.58 |  | 2.11 | 0.69 |  | 2.06 | 1.01 |
| *Chiropotes albinasus* | 0.66 |  | 1.09 | 1.75 |  | 3.72 | 2.61 |
| *Chiropotes satanas* | 0.68 |  | 2.81 | 1.56 |  | 2.93 | 2.45 |
| *Chiropotes utahickae* | 0.69 |  | 7.35 | 7.62 |  | 7.89 | 7.37 |
| *Lagothrix cana* | 1.2 |  | 2.28 | 1.38 |  | 2.36 | 3.66 |
| *Lagothrix flavicauda* | 1.3 |  | 0.41 | 0.05 |  | 1.76 | 0.25 |
| *Lagothrix lagotricha* | 1.4 |  | 1.32 | 0.06 |  | 1.18 | 0.30 |
| *Lagothrix poeppigii* | 1.6 |  | 0.58 | 0.55 |  | 0.57 | 0.47 |
| *Mico acariensis* | 0.78 |  | 2.24 | 2.47 |  | 2.27 | 0.91 |
| *Mico chrysoleucos* | 0.78 |  | 1.60 | 2.73 |  | 1.68 | 2.91 |
| *Mico emiliae* | 0.78 |  | 1.28 | 1.90 |  | 1.33 | 1.39 |
| *Mico humeralifer* | 0.78 |  | 4.76 | 1.34 |  | 3.89 | 1.31 |
| *Mico intermedius* | 0.78 |  | 3.73 | 2.23 |  | 3.71 | 2.43 |
| *Mico leucippe* | 0.78 |  | 2.89 | 1.10 |  | 3.31 | 1.50 |
| *Mico mauesi* | 0.78 |  | 2.46 | 4.23 |  | 2.29 | 1.94 |
| *Mico melanurus* | 0.78 |  | 0.25 | 0.19 |  | 0.35 | 0.36 |
| *Mico nigriceps* | 0.78 |  | 0.42 | 0.05 |  | 0.41 | 0.52 |
| *Mico saterei* | 0.78 |  | 1.87 | 1.56 |  | 1.71 | 0.88 |
| *Pithecia aequatorialis* | 0.71 |  | 1.41 | 2.57 |  | 2.12 | 3.05 |
| *Pithecia albicans* | 0.71 |  | 1.46 | 2.72 |  | 3.40 | 2.38 |
| *Pithecia pithecia* | 0.71 |  | 2.86 | 3.21 |  | 2.15 | 3.62 |
| *Plecturocebus aureipalatii* | 0.53 |  | 1.27 | 0.93 |  | 0.34 | 0.73 |
| *Plecturocebus bernhardi* | 0.53 |  | 1.29 | 0.54 |  | 1.04 | 0.56 |
| *Plecturocebus brunneus* | 0.53 |  | 3.21 | 1.43 |  | 3.66 | 3.93 |
| *Plecturocebus caligatus* | 0.53 |  | 0.58 | 2.88 |  | 0.89 | 3.30 |
| *Plecturocebus cinerascens* | 0.53 |  | 1.62 | 1.10 |  | 1.40 | 1.23 |
| *Plecturocebus cupreus* | 0.53 |  | 1.52 | 0.49 |  | 1.34 | 0.26 |
| *Plecturocebus discolor* | 0.53 |  | 1.14 | 1.08 |  | 1.39 | 1.43 |
| *Plecturocebus donacophilus* | 0.53 |  | 3.51 | 1.88 |  | 3.33 | 2.00 |
| *Plecturocebus dubius* | 0.53 |  | 2.72 | 1.85 |  | 2.52 | 2.09 |
| *Plecturocebus hoffmannsi* | 0.53 |  | 3.34 | 3.68 |  | 4.44 | 3.15 |
| *Plecturocebus modestus* | 0.53 |  | 0.52 | 26.13 |  | 0.52 | 25.45 |
| *Plecturocebus moloch* | 0.53 |  | 3.91 | 4.67 |  | 3.43 | 2.77 |
| *Plecturocebus oenanthe* | 0.53 |  | 0.45 | 0.72 |  | 0.92 | 0.79 |
| *Plecturocebus olallae* | 0.53 |  | 0.45 | 0.72 |  | 0.92 | 0.79 |
| *Plecturocebus stephennashi* | 0.53 |  | 2.49 | 0.30 |  | 2.58 | 0.75 |
| *Saguinus bicolor* | 0.95 |  | 1.60 | 1.15 |  | 0.75 | 1.78 |
| *Saguinus fuscicollis* | 0.95 |  | 2.44 | 3.61 |  | 2.83 | 2.80 |
| *Saguinus imperator* | 0.95 |  | 0.51 | 0.54 |  | 0.44 | 0.94 |
| *Saguinus inustus* | 0.95 |  | 1.31 | 0.51 |  | 1.15 | 0.66 |
| *Saguinus labiatus* | 0.95 |  | 2.23 | 2.78 |  | 2.97 | 4.24 |
| *Saguinus martinsi* | 0.95 |  | 1.69 | 2.30 |  | 0.95 | 0.94 |
| *Saguinus melanoleucus* | 0.95 |  | 1.21 | 1.50 |  | 1.25 | 2.25 |
| *Saguinus midas* | 0.95 |  | 4.01 | 2.97 |  | 2.09 | 3.39 |
| *Saguinus mystax* | 0.95 |  | 1.19 | 0.79 |  | 0.96 | 0.44 |
| *Saguinus niger* | 0.95 |  | 2.79 | 2.27 |  | 3.77 | 4.21 |
| *Saguinus nigricollis* | 0.95 |  | 3.48 | 3.92 |  | 4.01 | 4.36 |
| *Saguinus tripartitus* | 0.95 |  | 3.00 | 1.69 |  | 3.01 | 1.67 |
| *Saimiri boliviensis* | 0.38 |  | 0.39 | 0.17 |  | 0.35 | 0.31 |
| *Saimiri sciureus* | 0.38 |  | 4.51 | 4.54 |  | 5.42 | 7.97 |
| *Saimiri ustus* | 0.38 |  | 3.65 | 2.70 |  | 3.62 | 0.76 |
| *Saimiri vanzolinii* | 0.38 |  | 10.26 | 0.76 |  | 8.95 | 0.78 |
| *Sapajus apella* | 0.57 |  | 2.62 | 2.95 |  | 2.15 | 2.69 |

**Supporting Figure Captions**

Fig. S1. Predicted variation on Amazon primate potential distribution under climate change and deforestation. Variation in potential distribution is given as % change on number of suitable cells, estimated using Ecological Niche Models, under optimistic and pessimistic scenarios of climate change (*rcp4.5* – Mitigation, and *rcp8.5* – Business-as-usual respectively). *Climate-only* panelsconsider solely climate change, while *Climate + deforestation* panels also include the joint effects of deforestation as *a posteriori* unsuitability masks, in addition to dispersal constraints. The dashed black line indicates no variation, so points above it are range expansion, while points below are range reduction. The inclusion of deforestation leads to larger losses on potential distribution of Amazon primates.

Fig. S2. Predicted variation on richness of Amazon primates, as function of climate change and/or deforestation. Upper panels refer to *Climate-only* scenarios, while lower panels are *Climate + deforestation* forecasts. Left panels (a,c) refer to *Mitigation* expectations of human development, while right (b,d) are *Business-as-usual* scenarios.

Fig. S3. Potential distribution of Amazon primates and changes on range centroids. Maps are given as binary (threshold-converted) predictions. Red empty polygons indicate current limits of species distribution, as provided by the International Union for the Conservation of Nature (<https://www.iucnredlist.org/>). Red dots indicate the centroid of current distribution, while blue dots indicate the centroid of future distribution. Panels a) and b) provide estimates under *Climate change* alone, while panels c) and d) include *Climate change and Deforestation*. Panels a) and c) refer to a *Mitigation* scenario (*rcp4.5*) while panels b) and d) refer to a *Business-as-usual* scenario (*rcp8.5*).

**Supporting Figures**


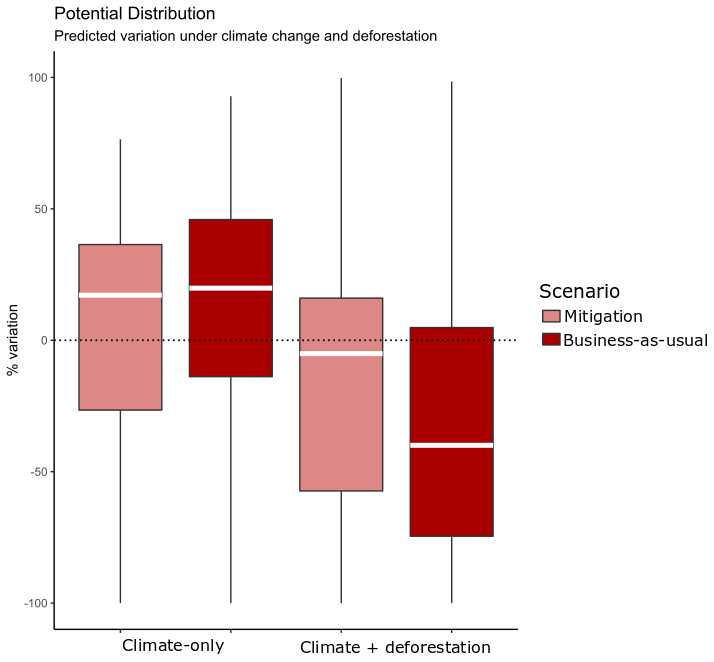


Figure S1 | Predicted variation on Amazon primate potential distribution under climate change and deforestation.


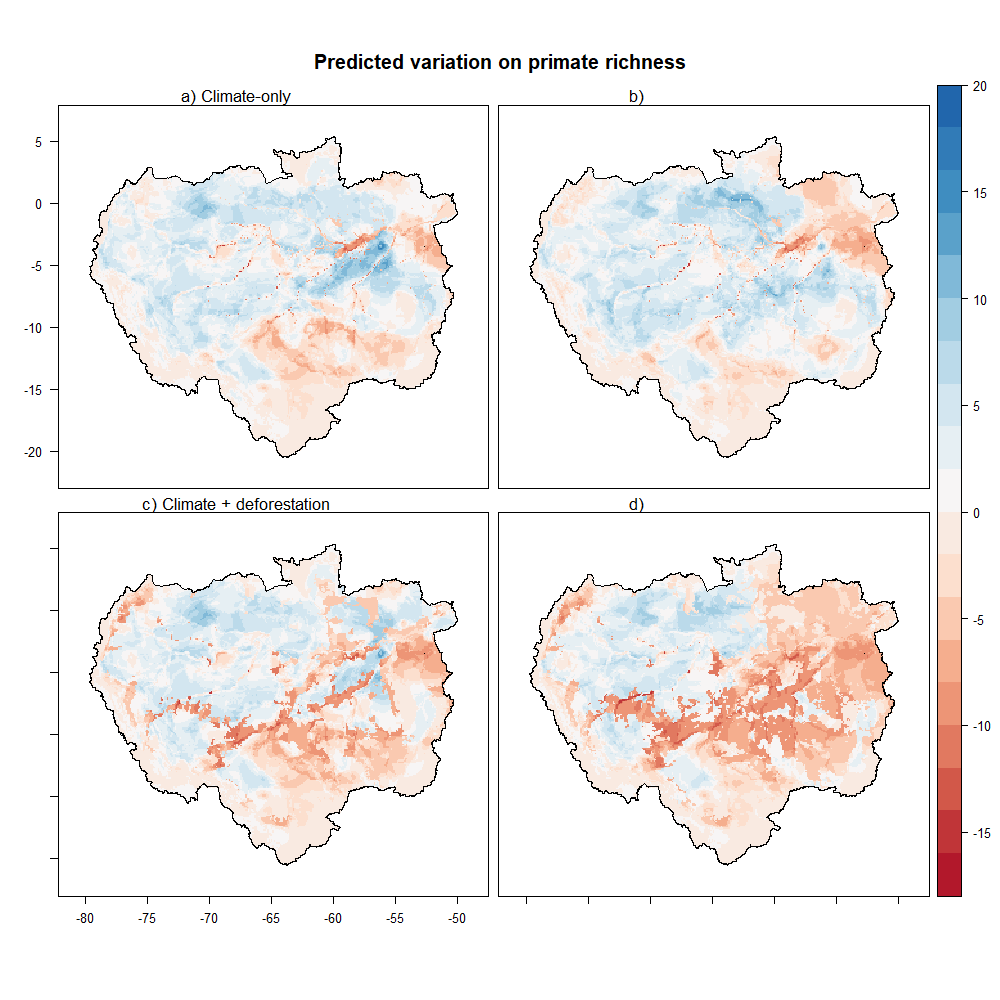


Fig. S2. Predicted variation on richness of Amazon primates, as function of climate change and/or deforestation.


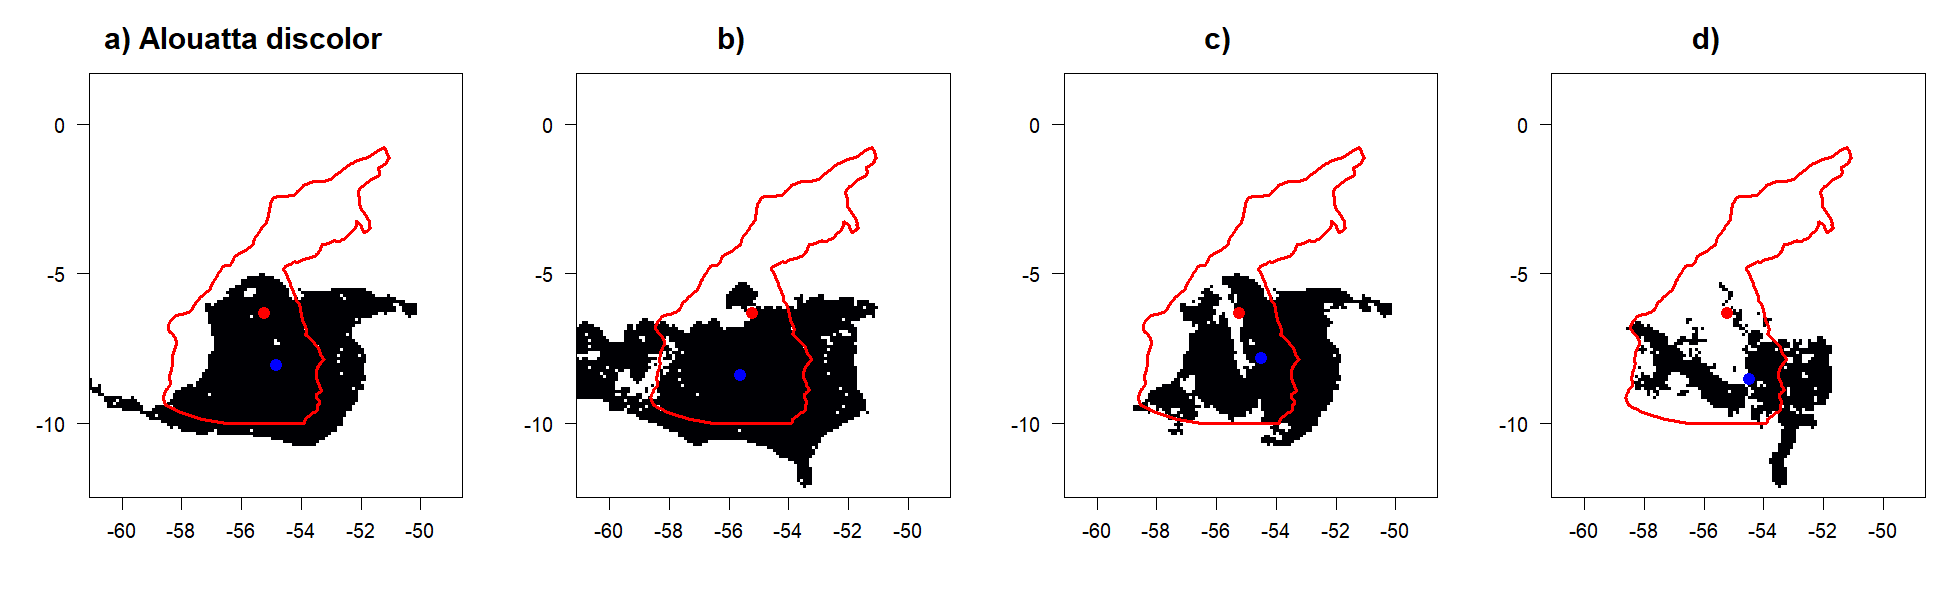

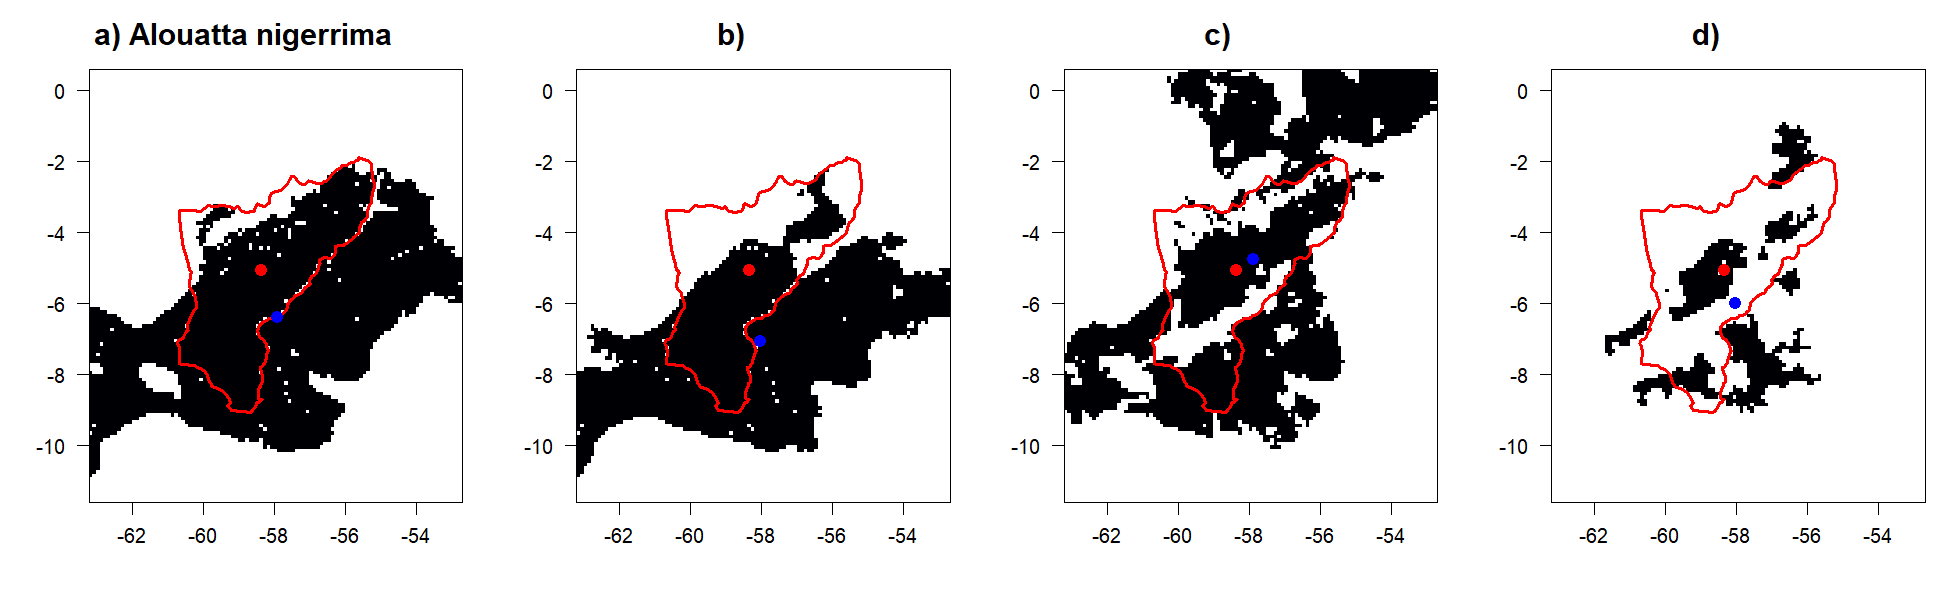

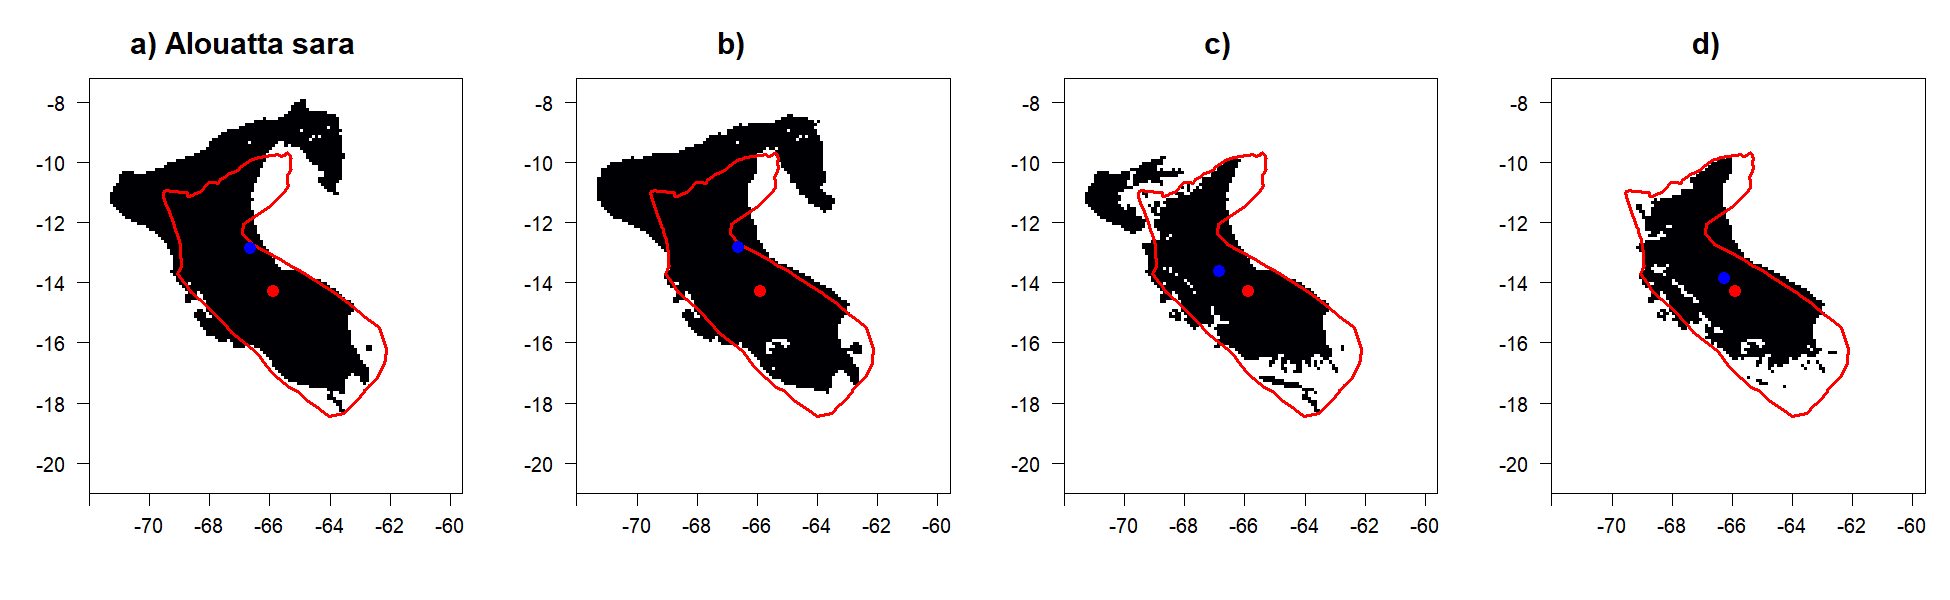

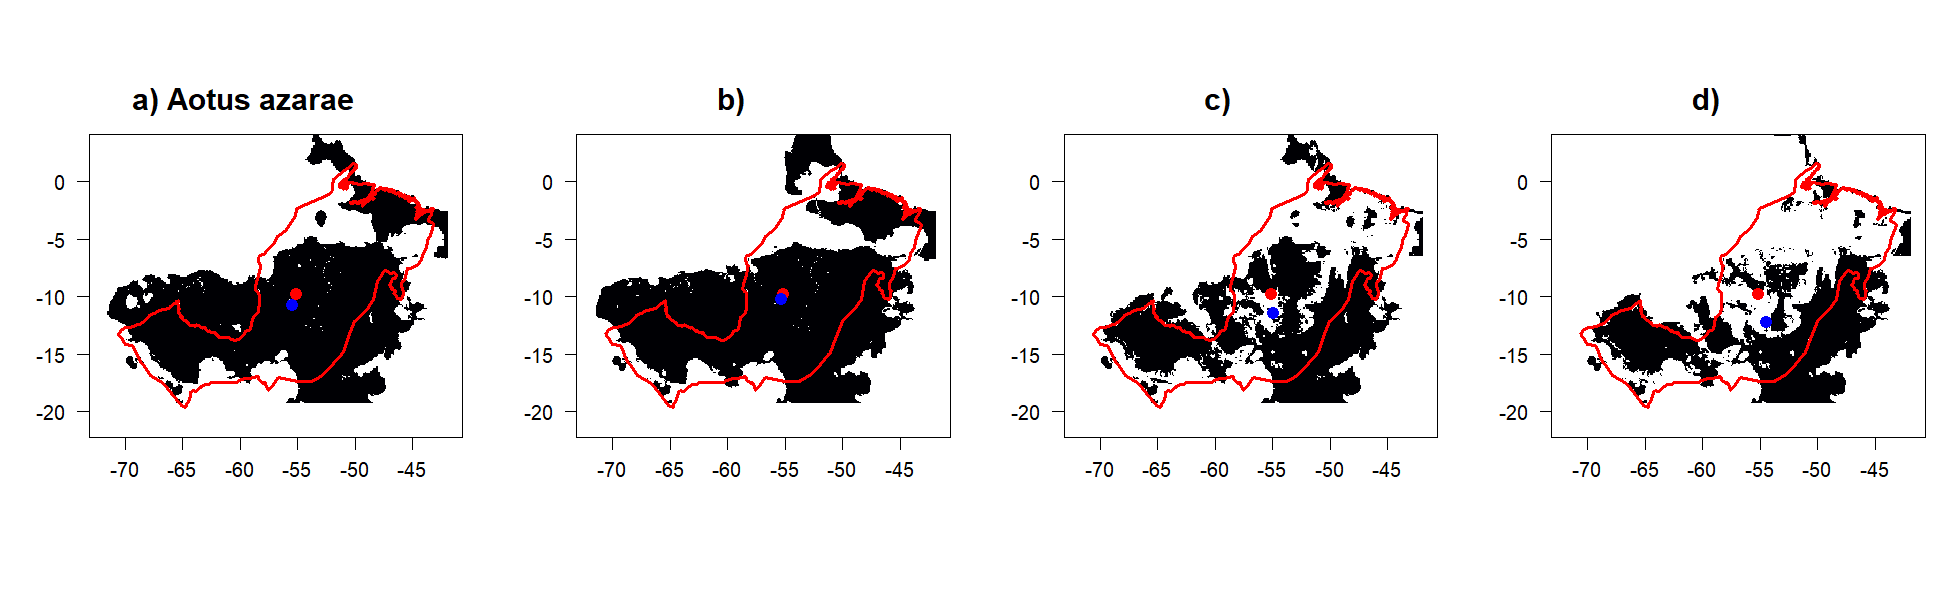

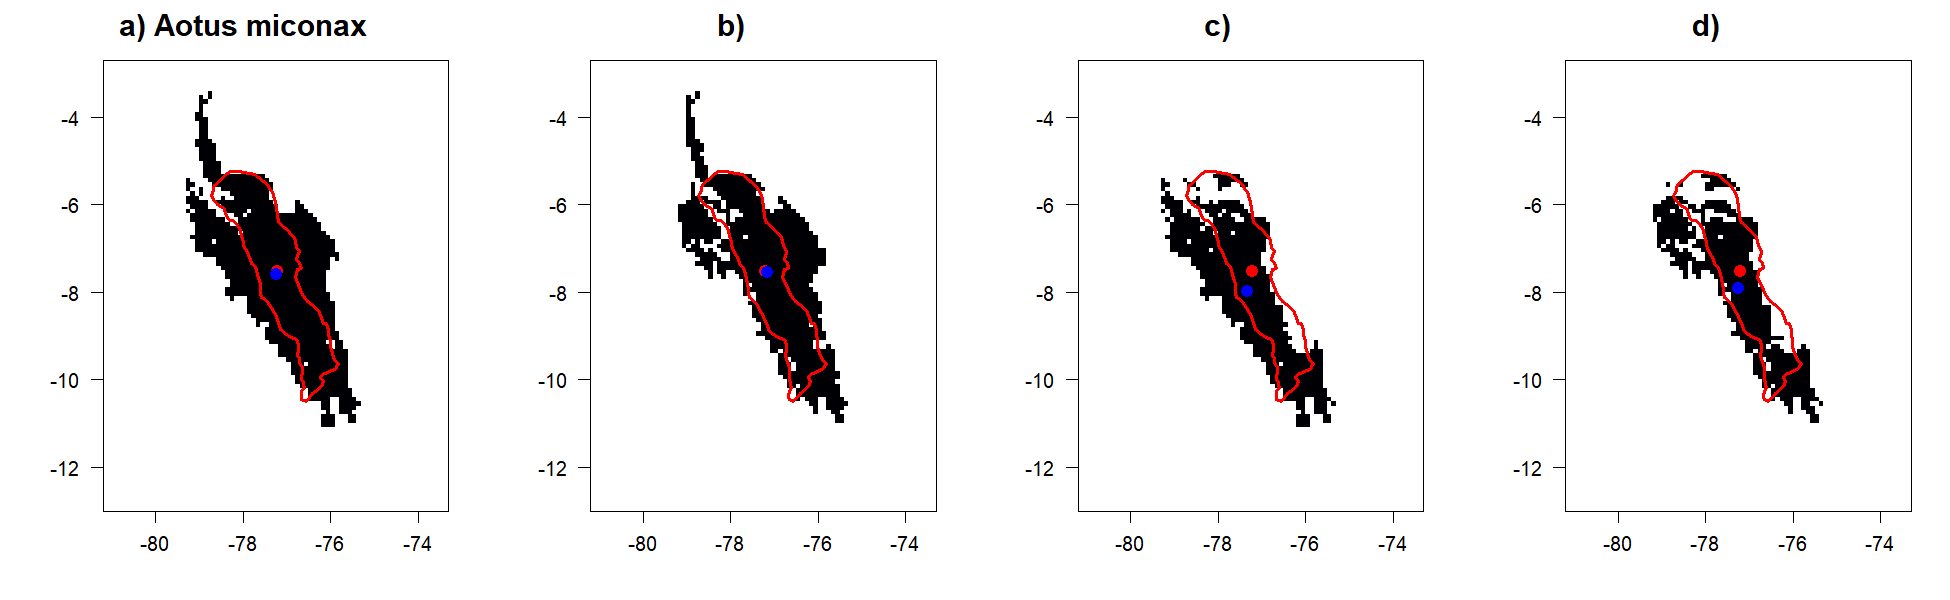

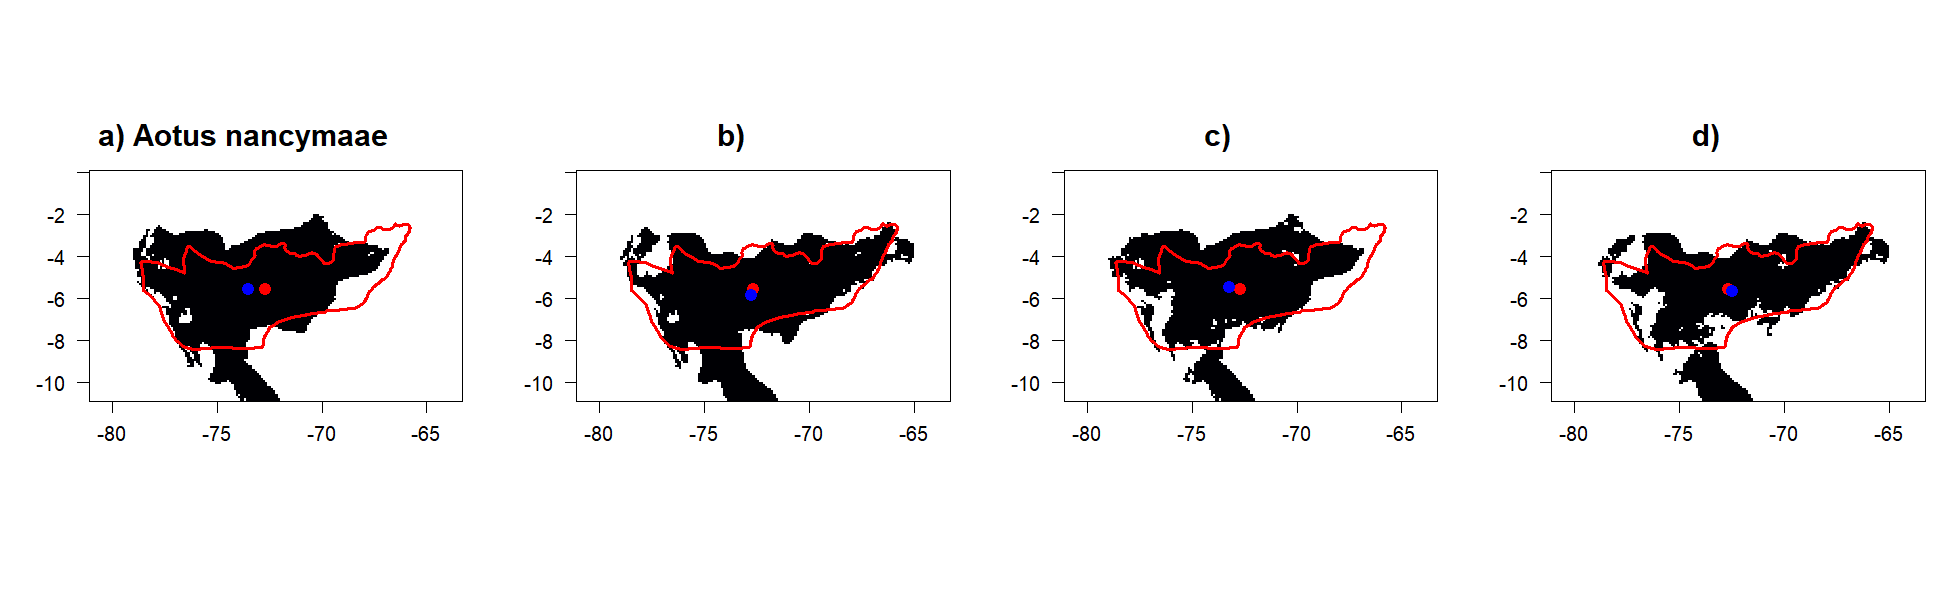

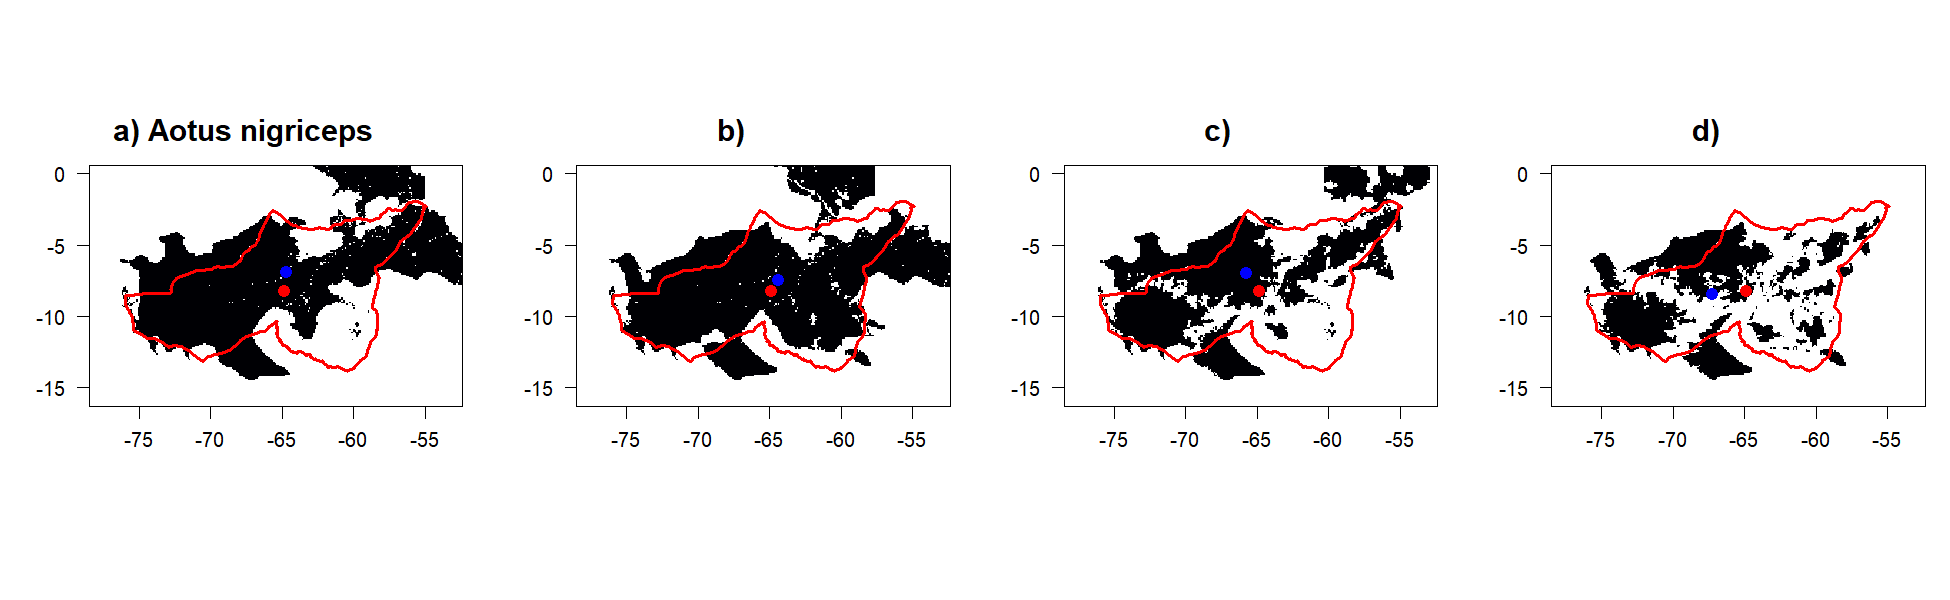

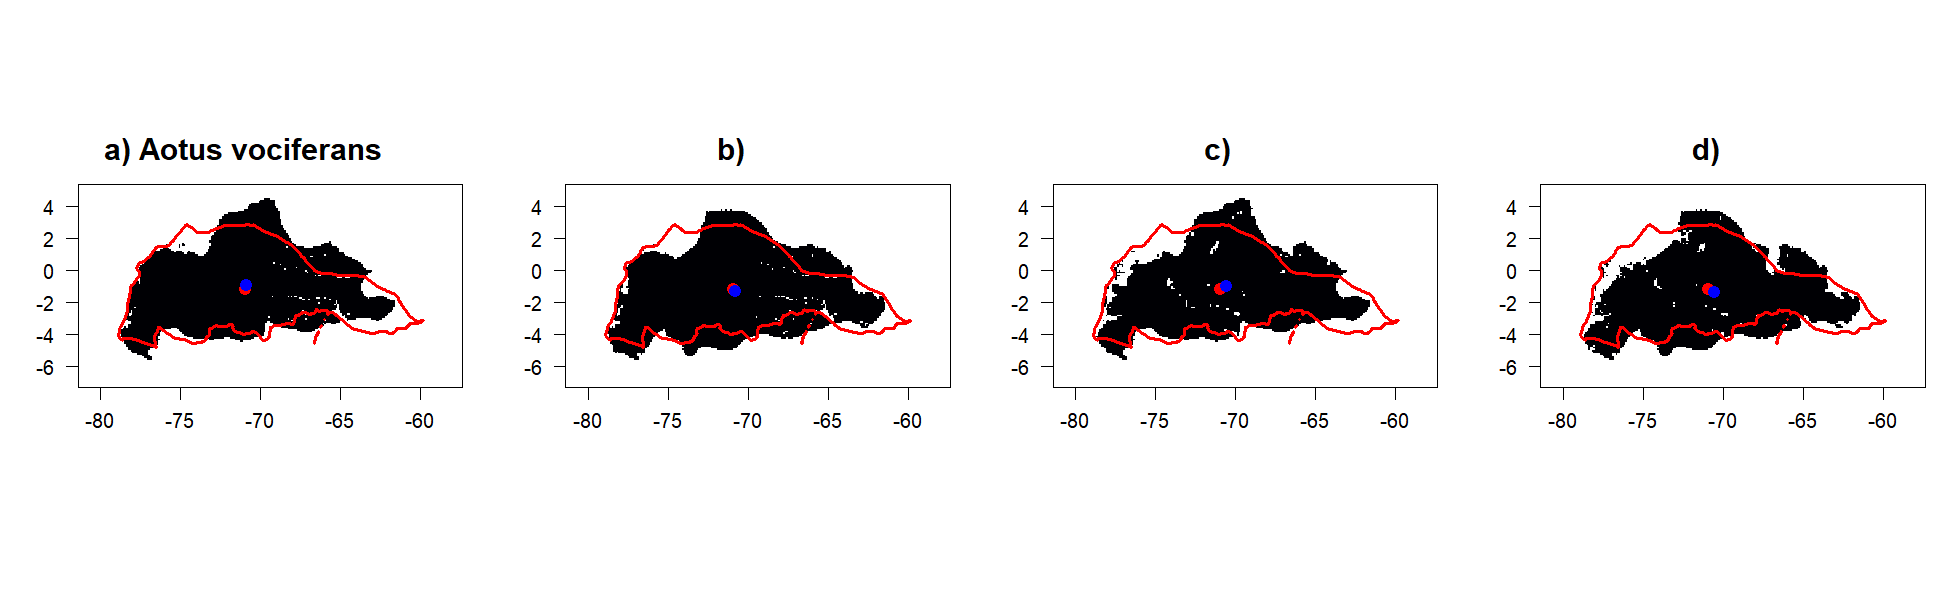

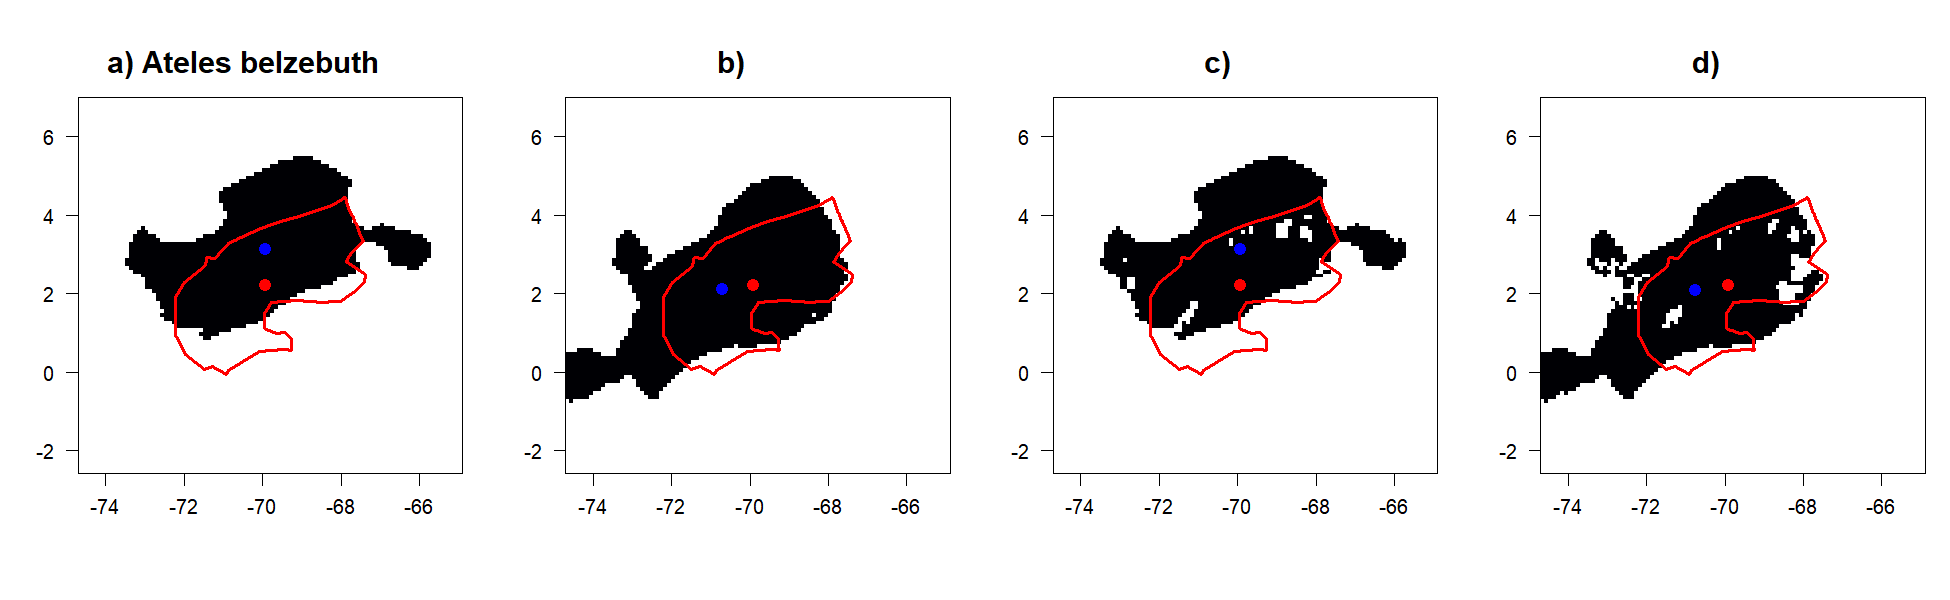

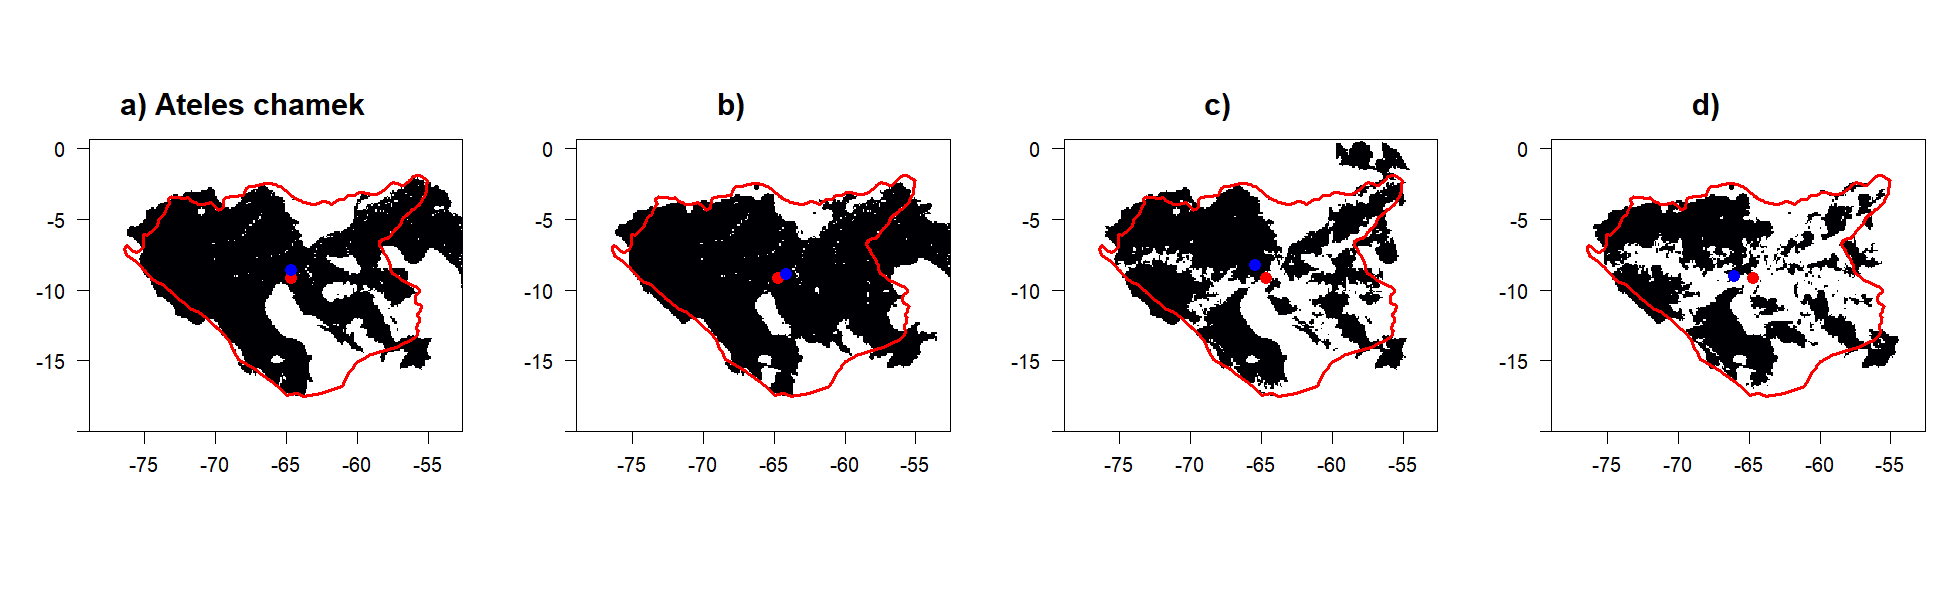

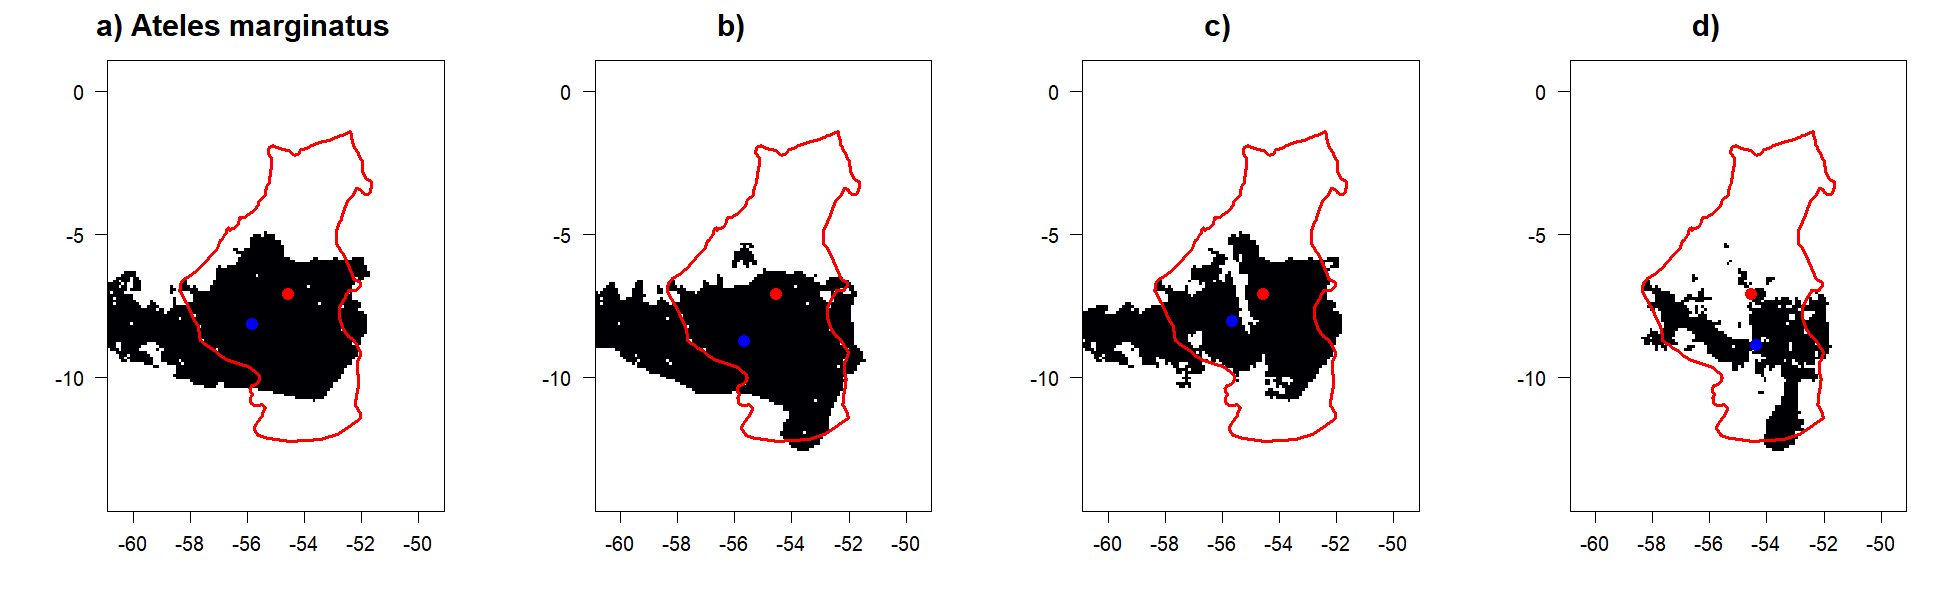

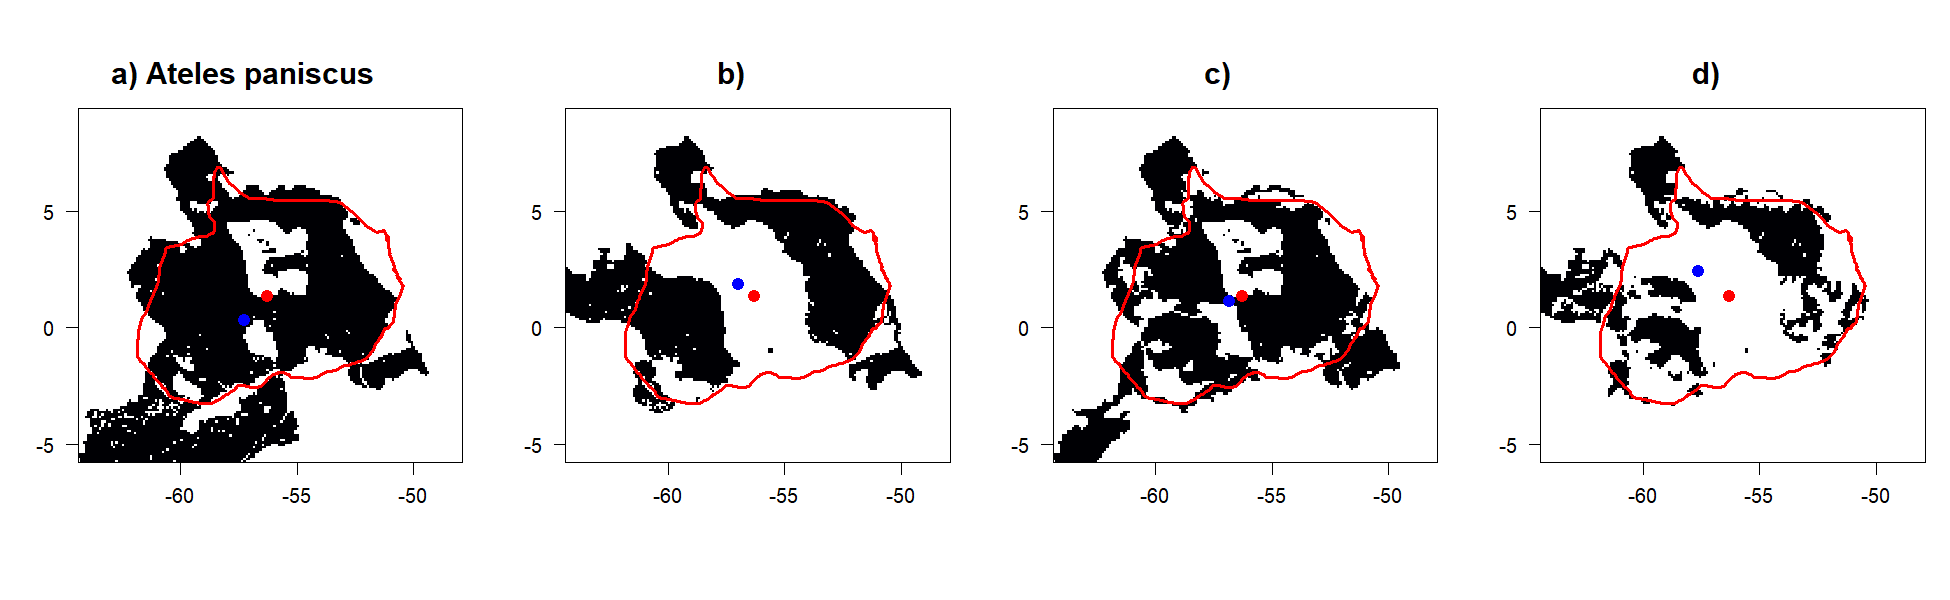

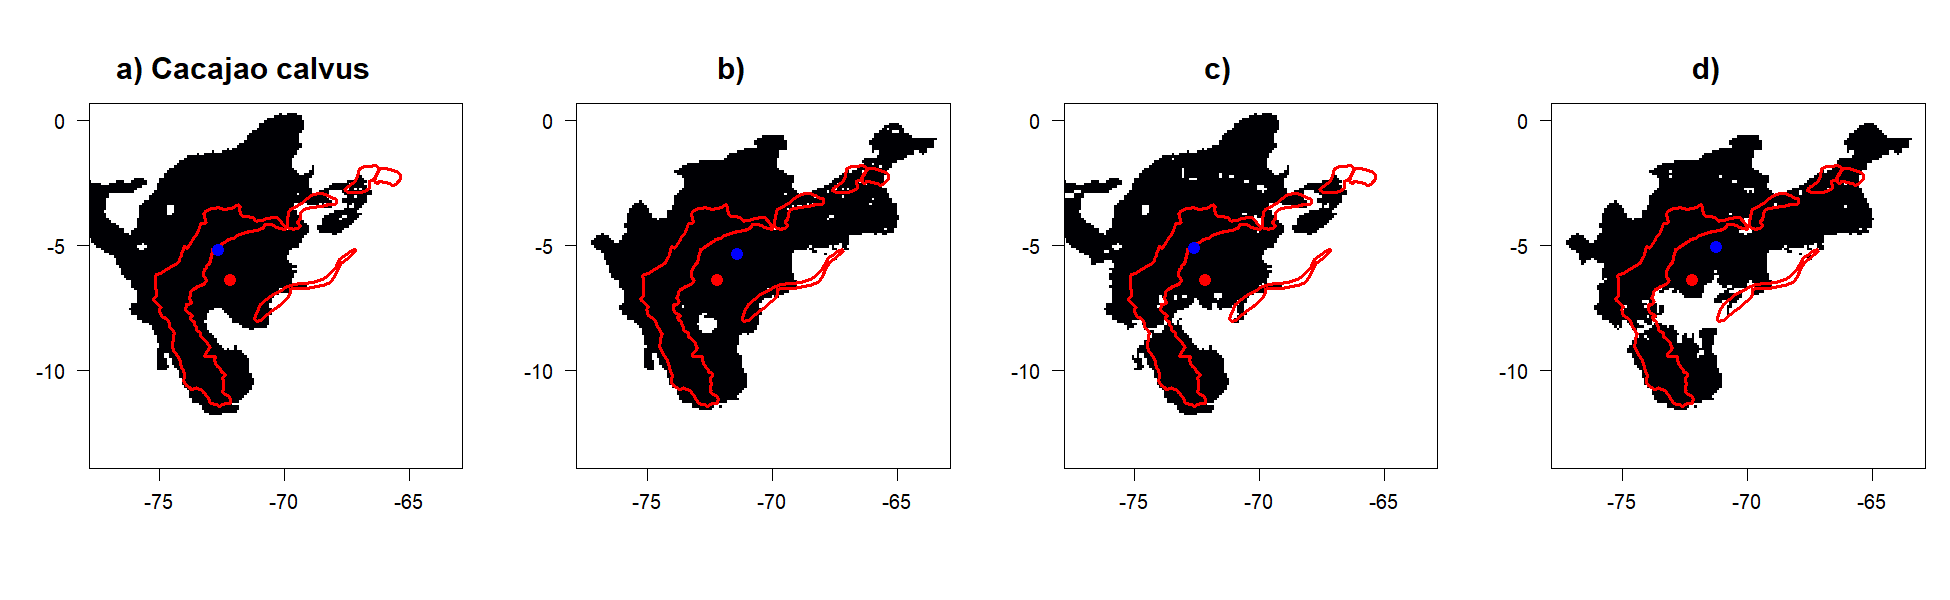

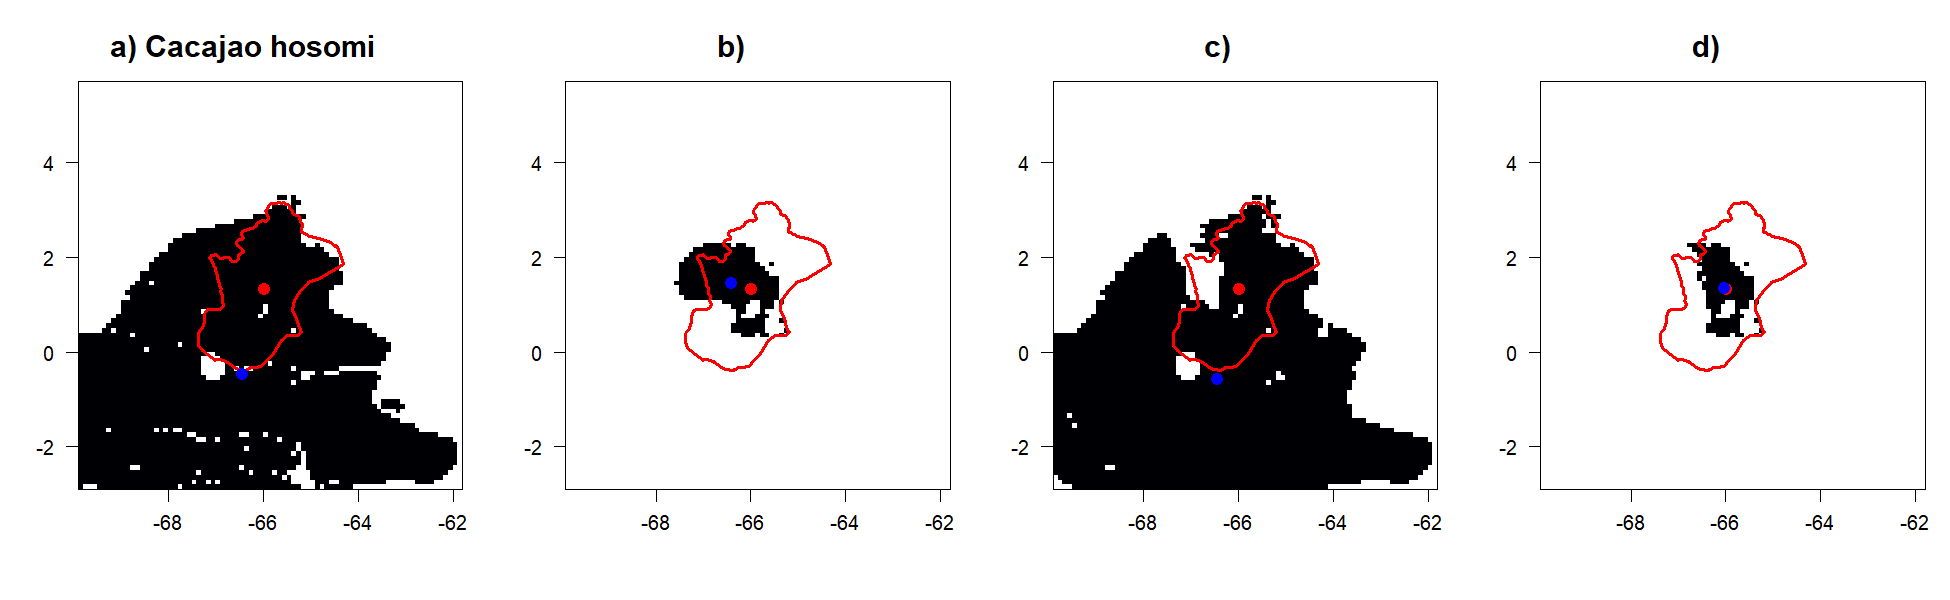

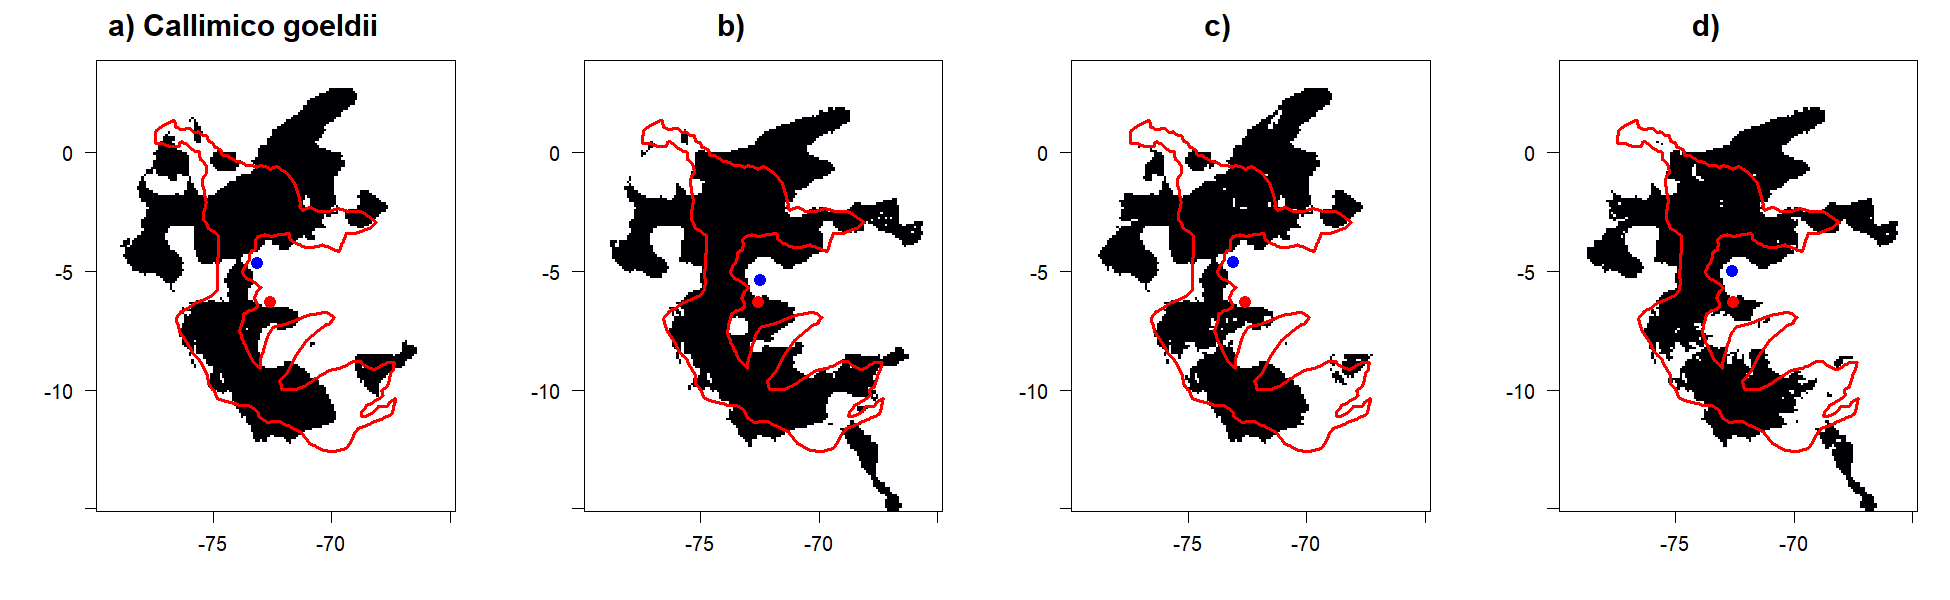

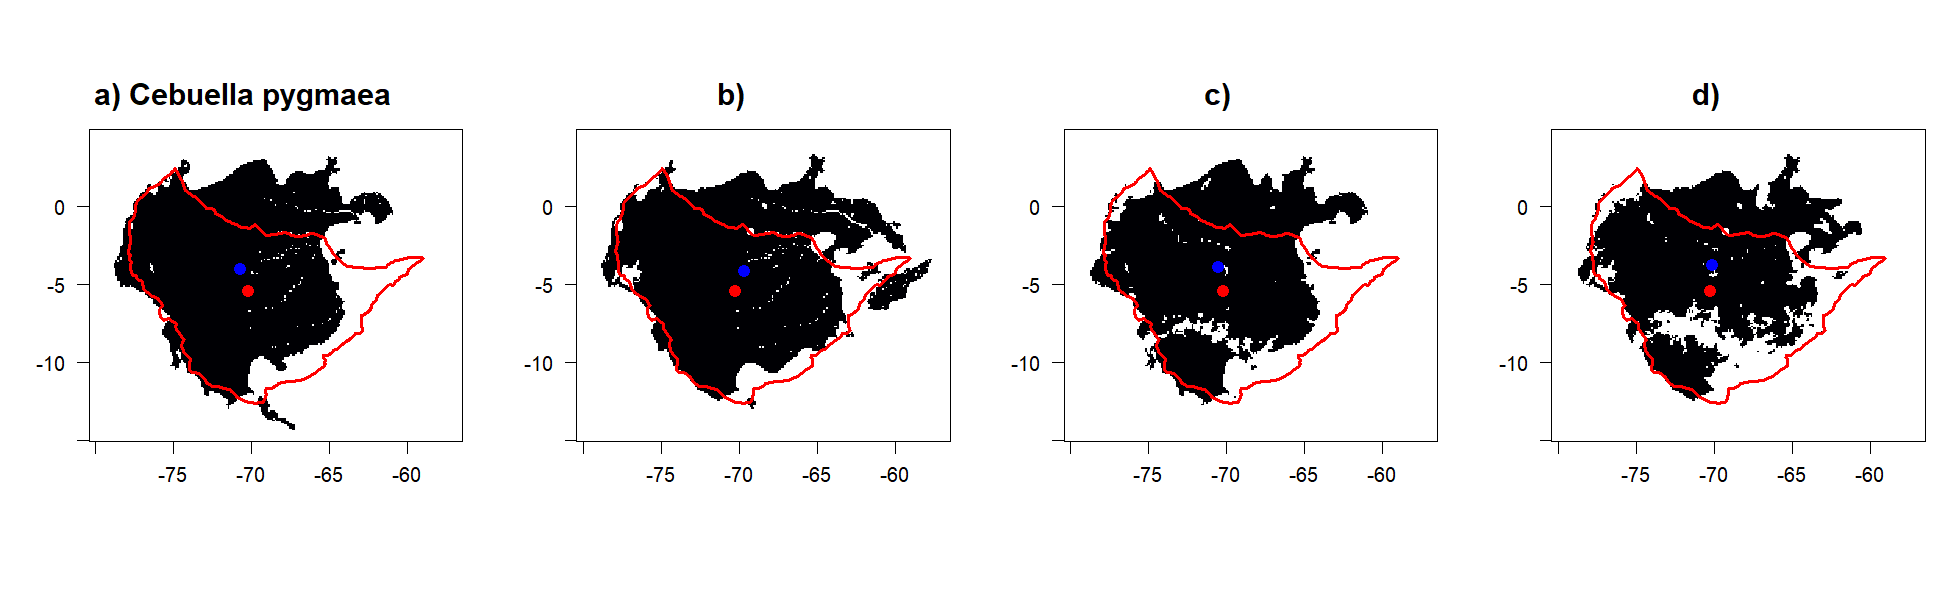

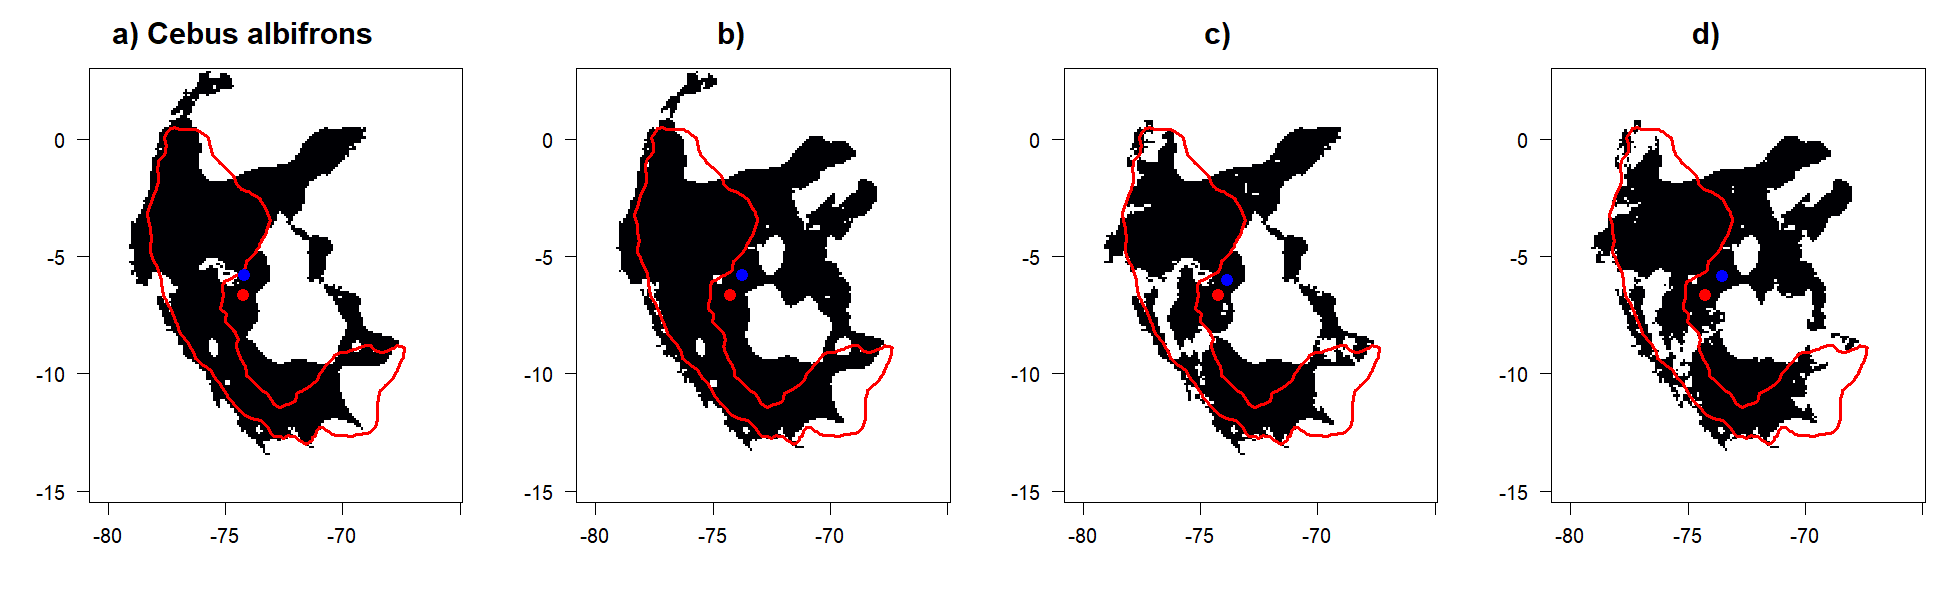

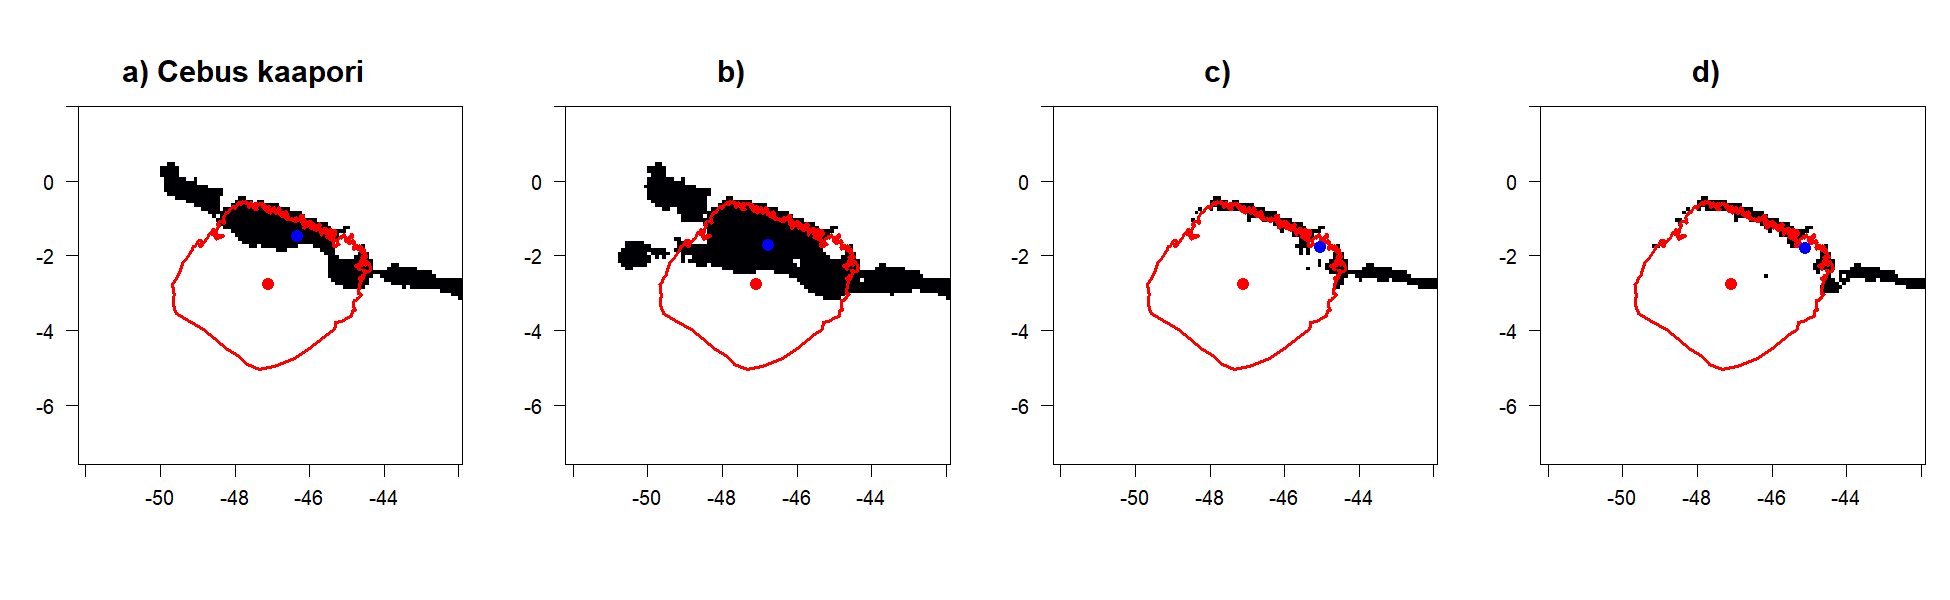

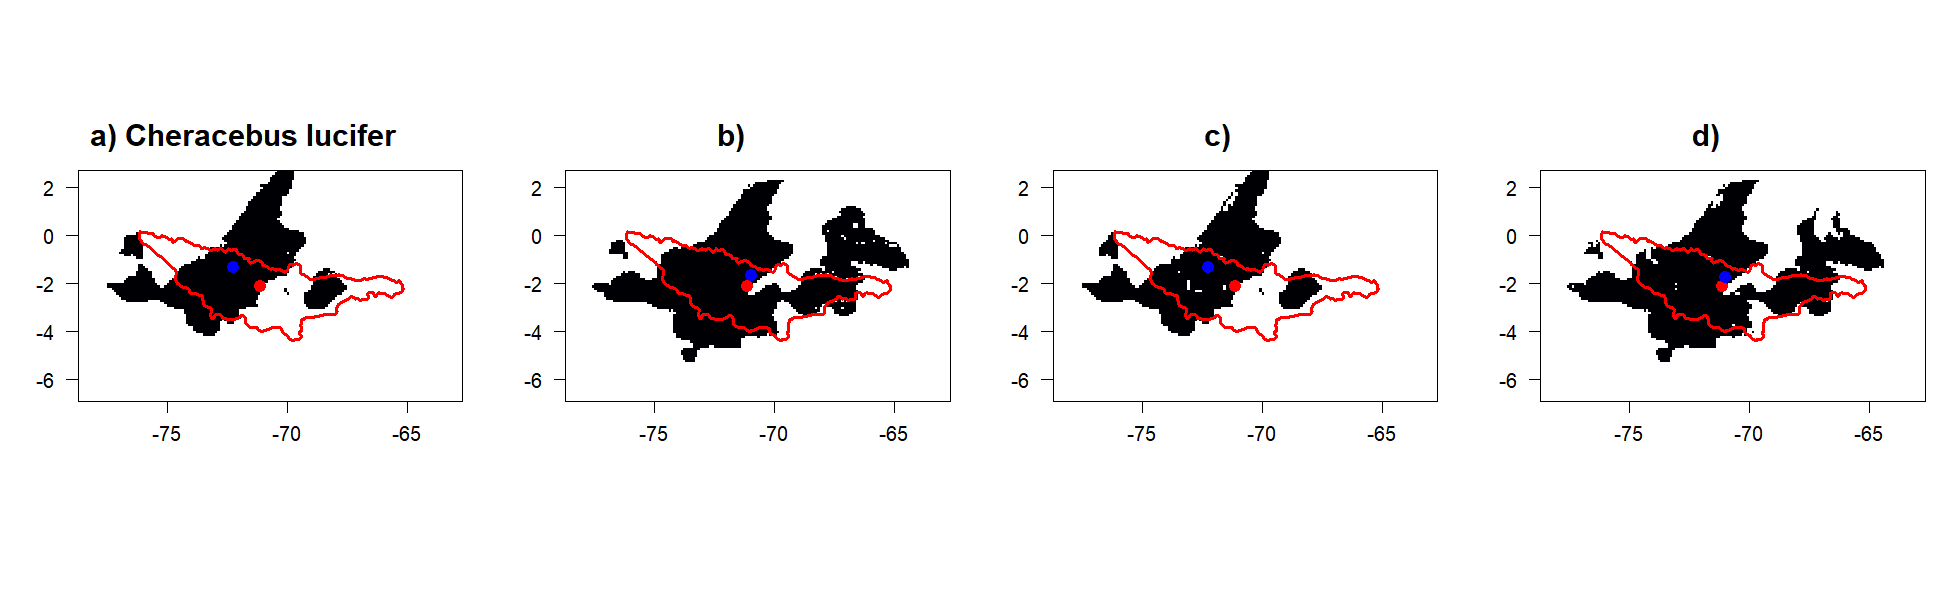

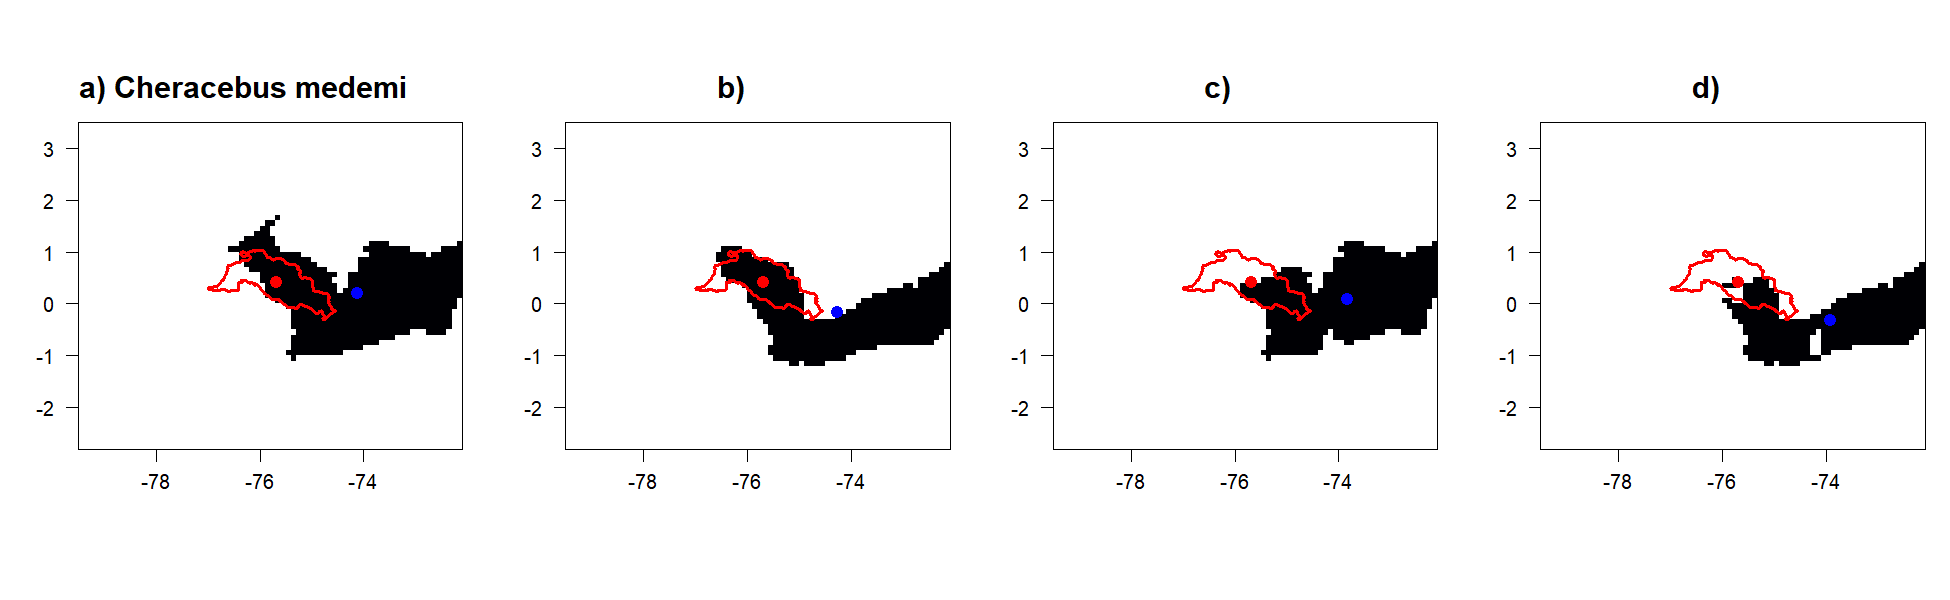

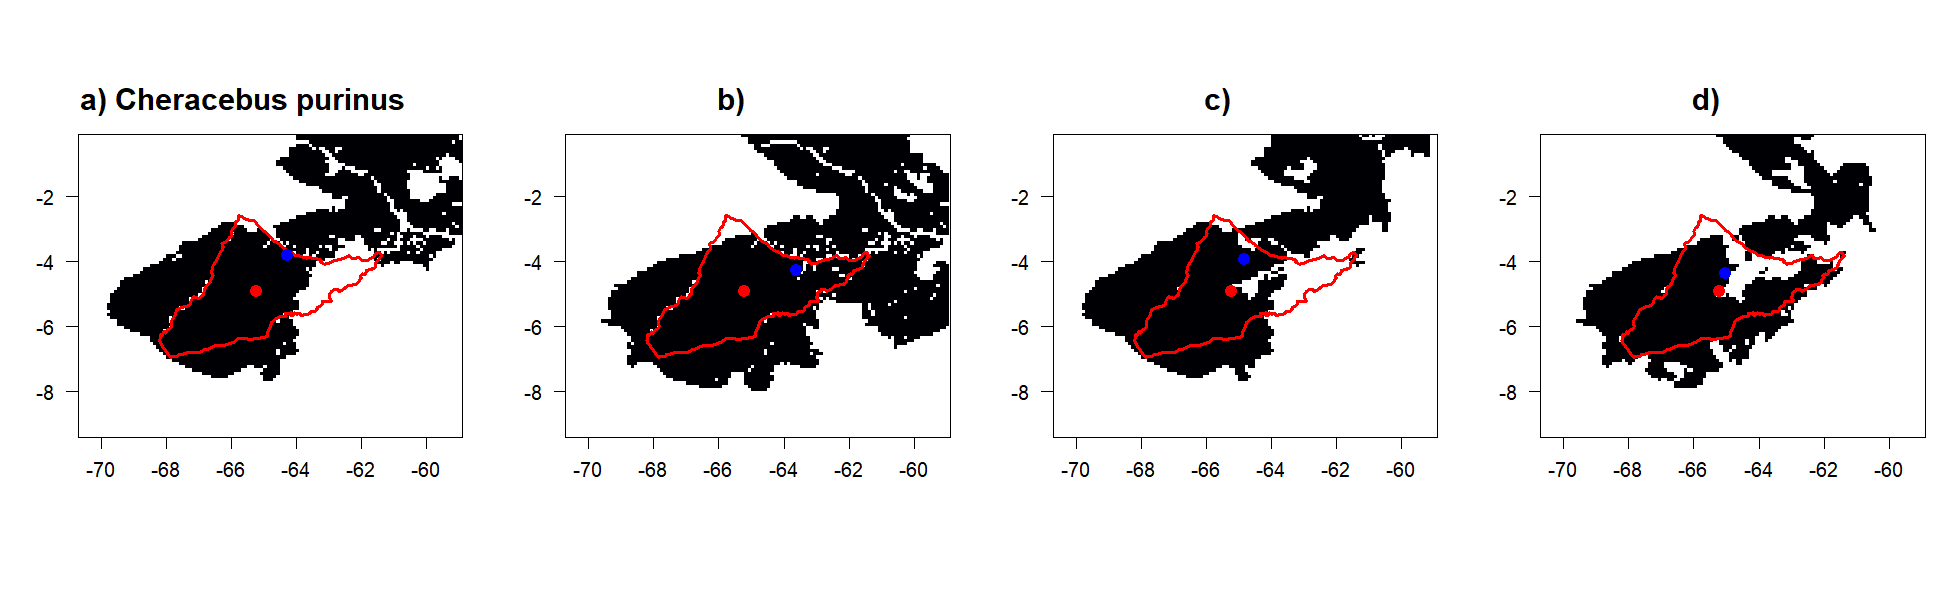

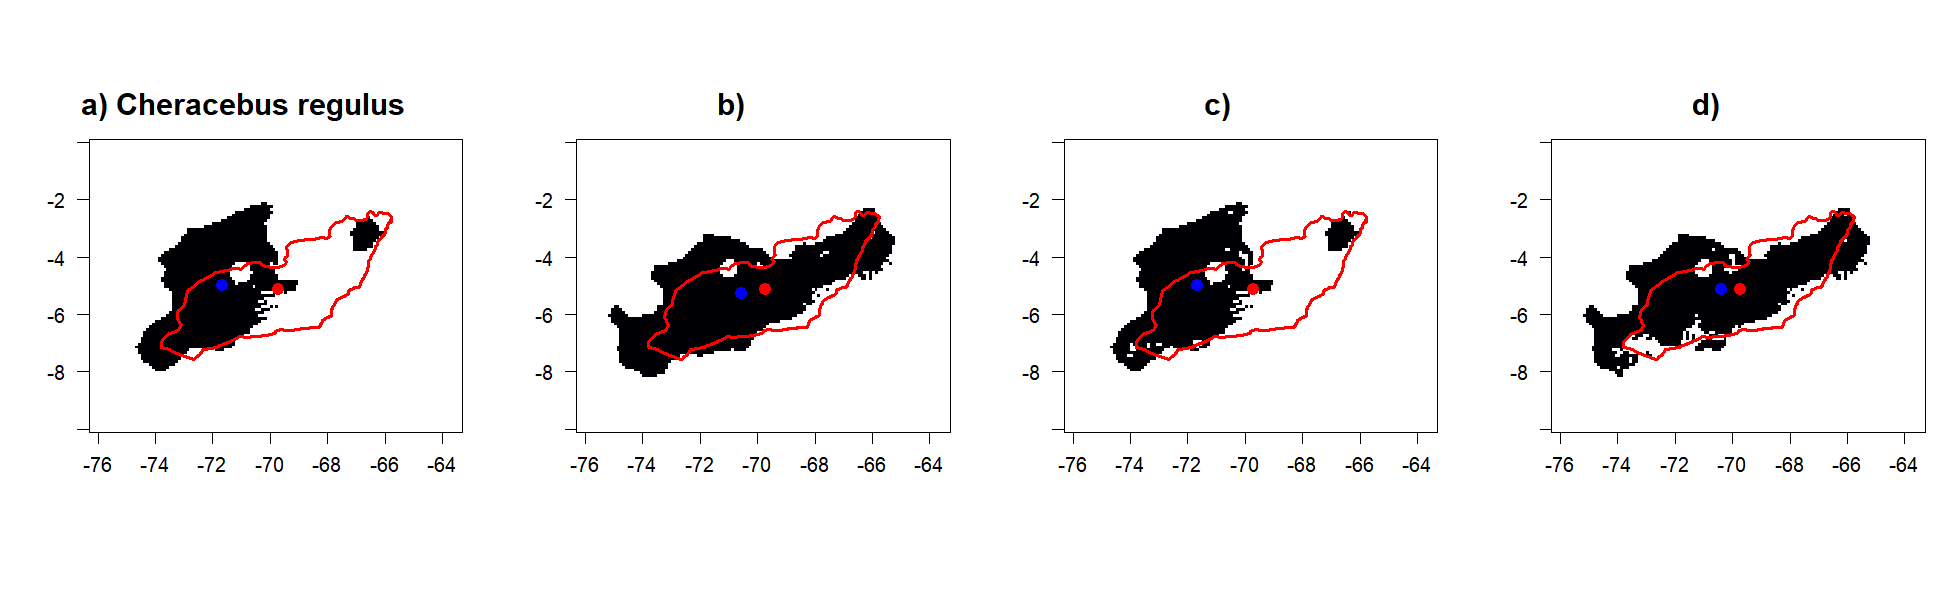

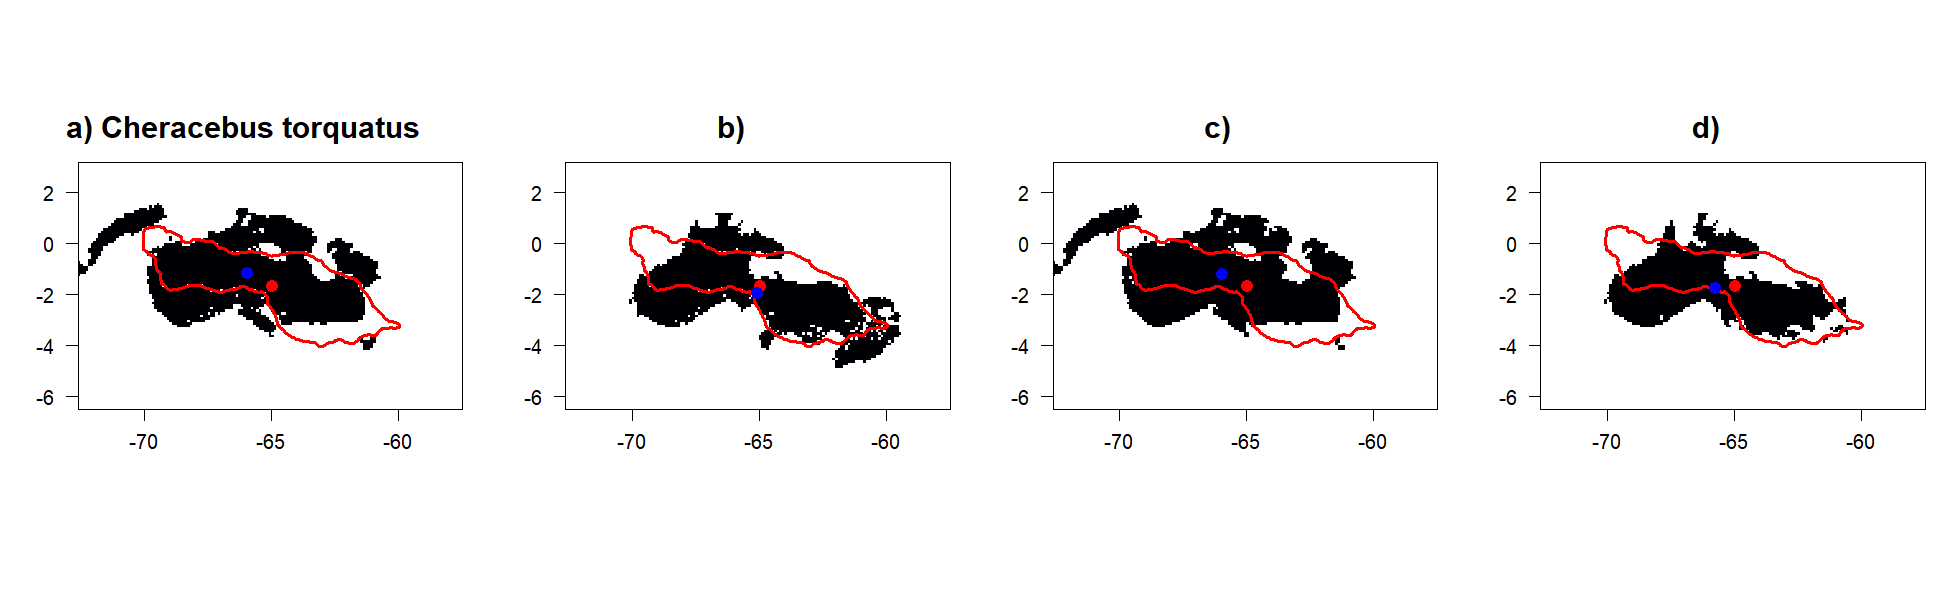

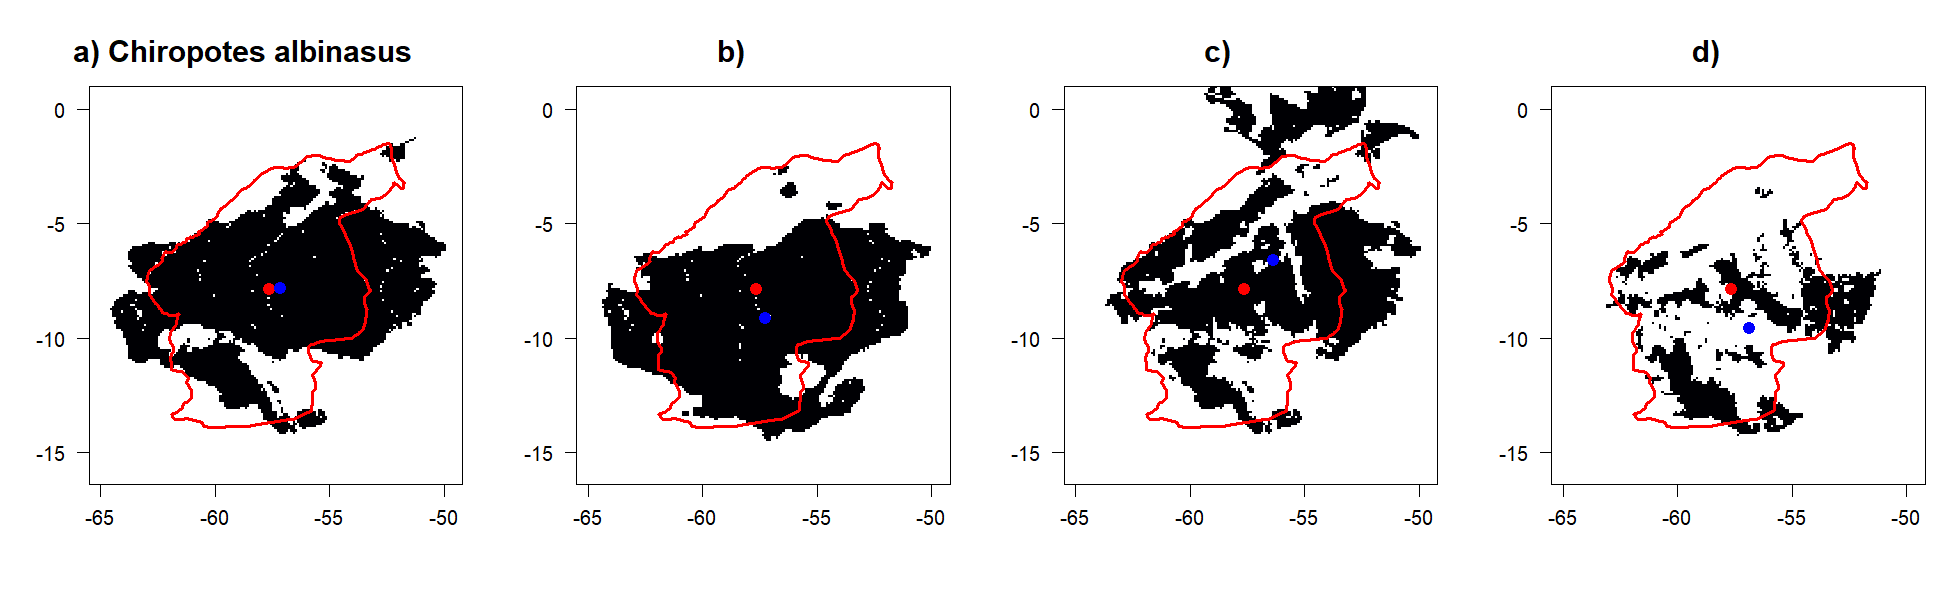

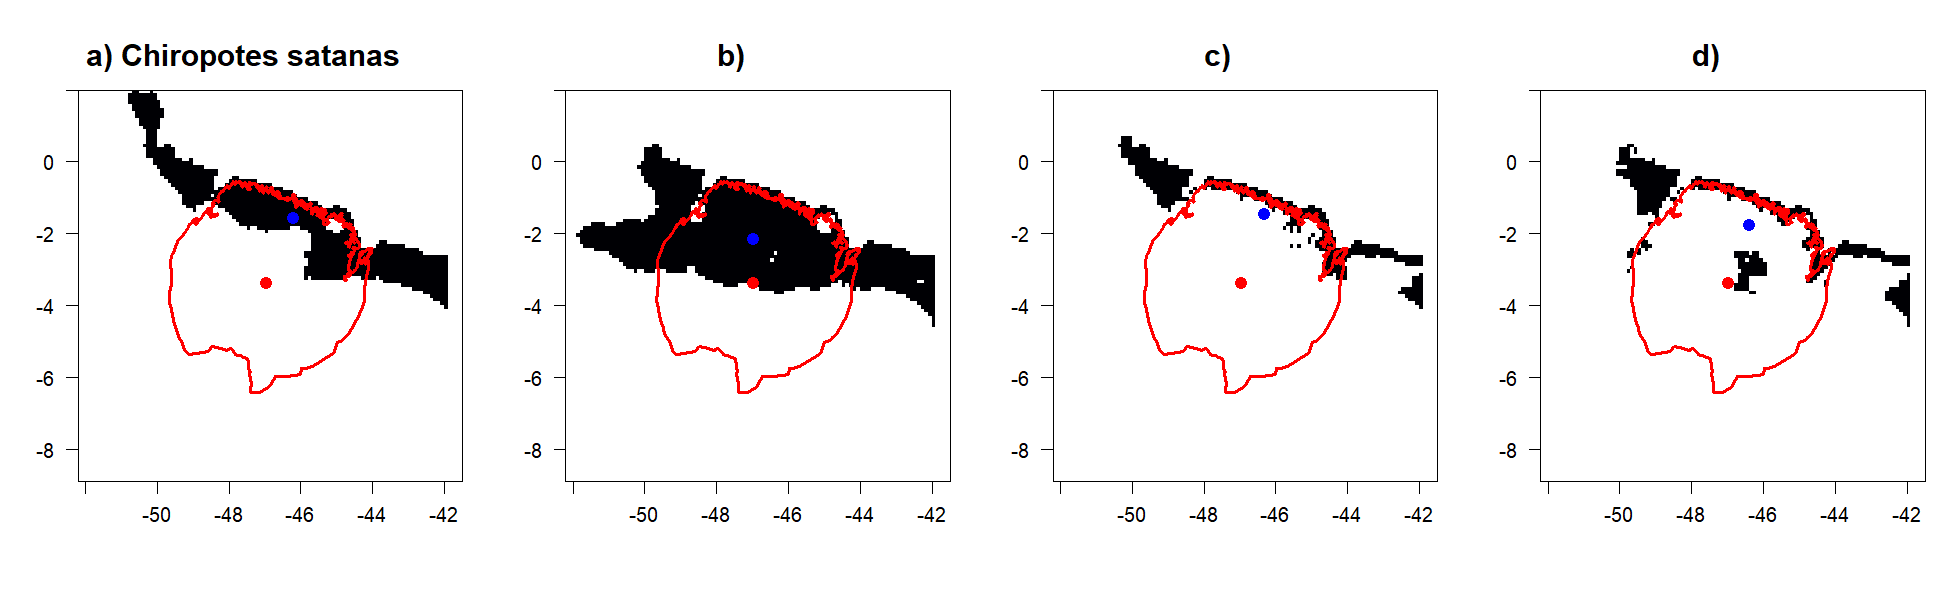

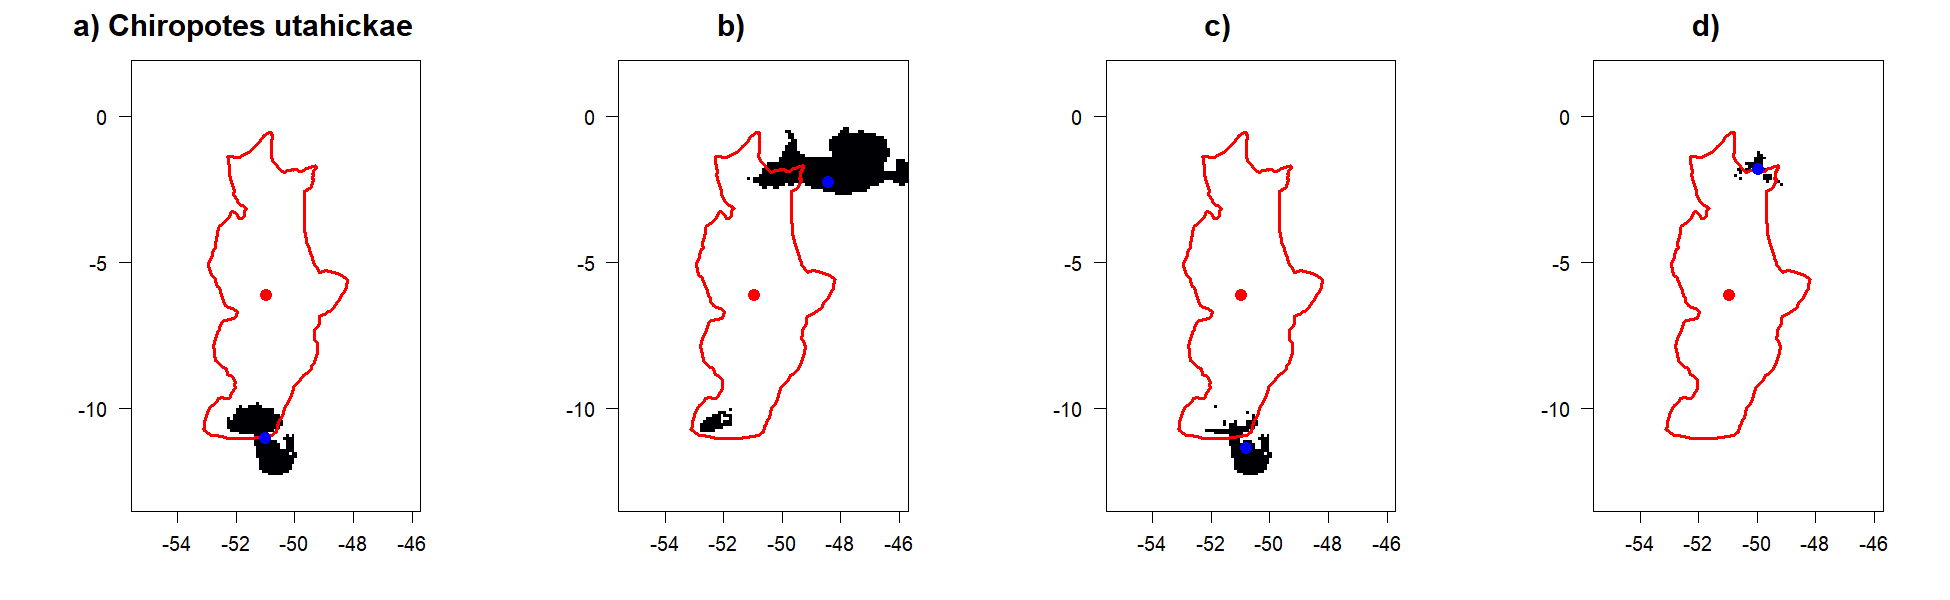

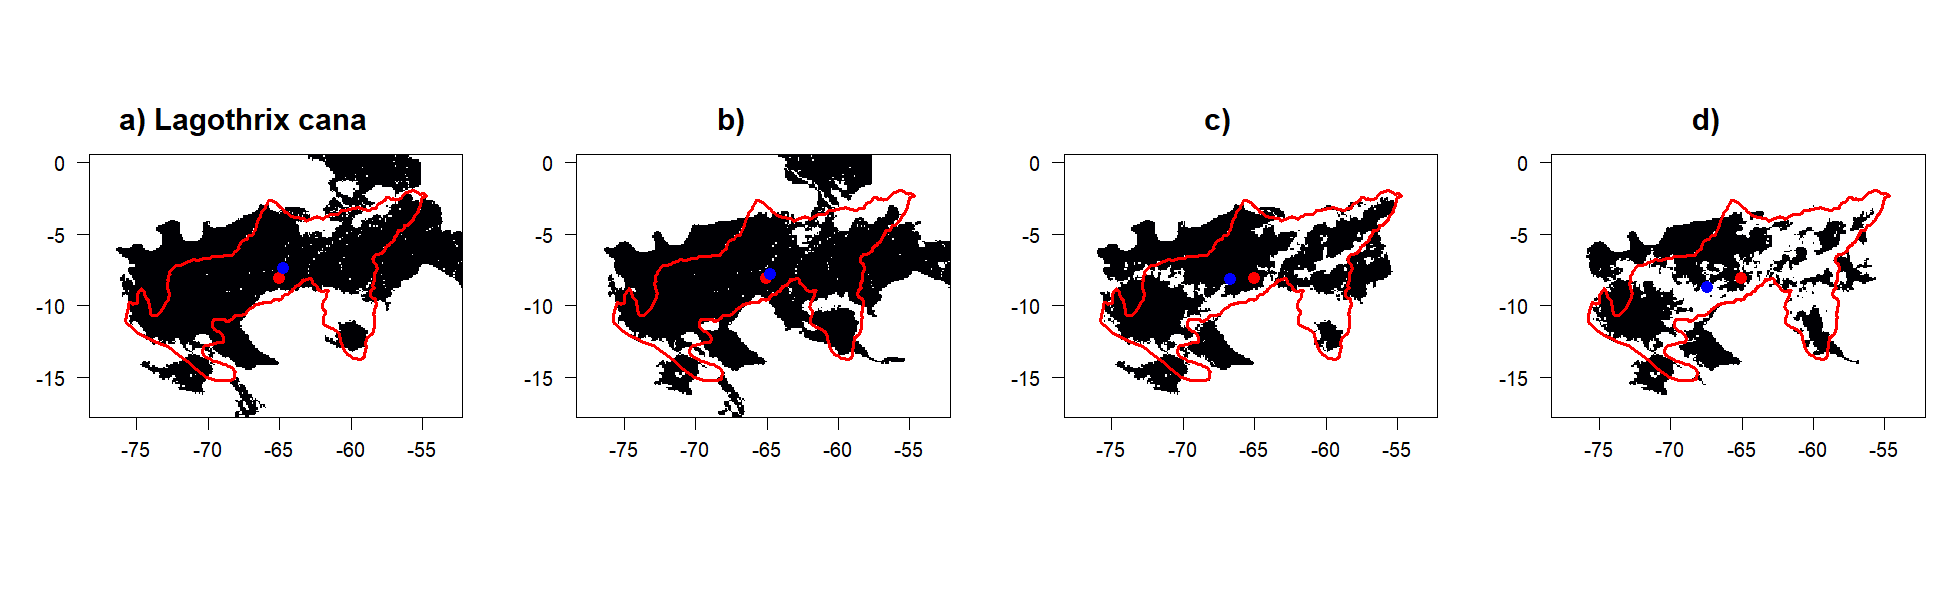

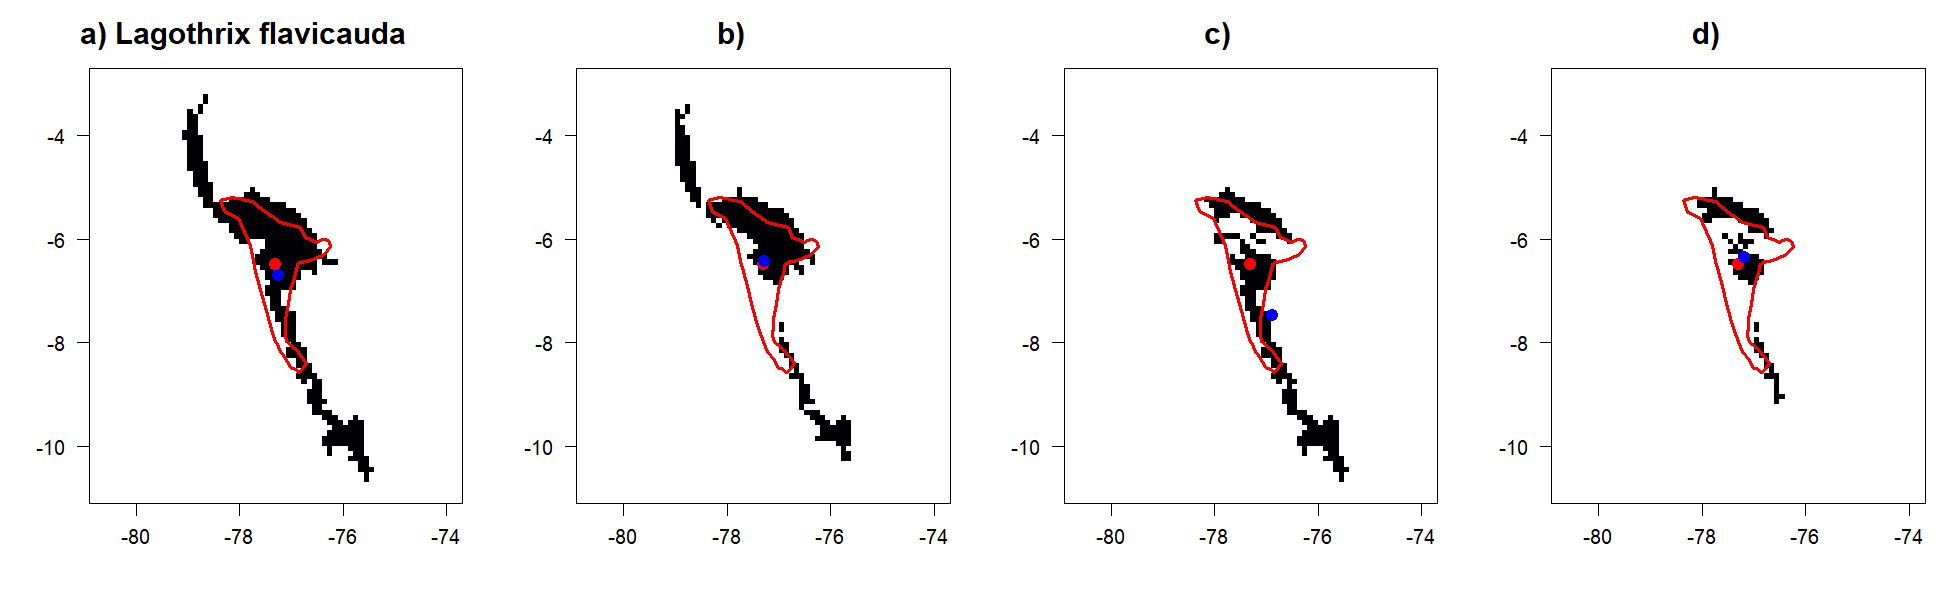

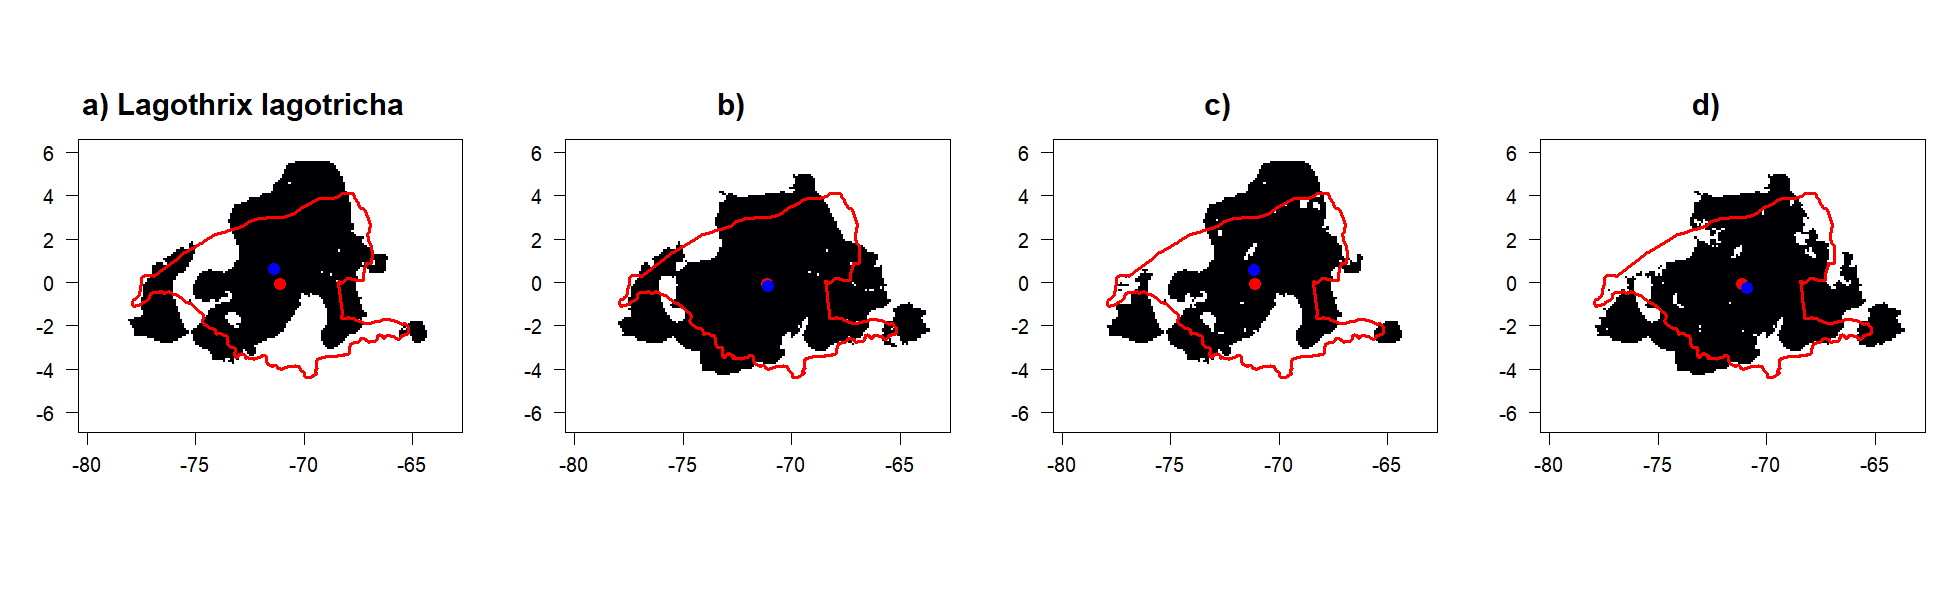

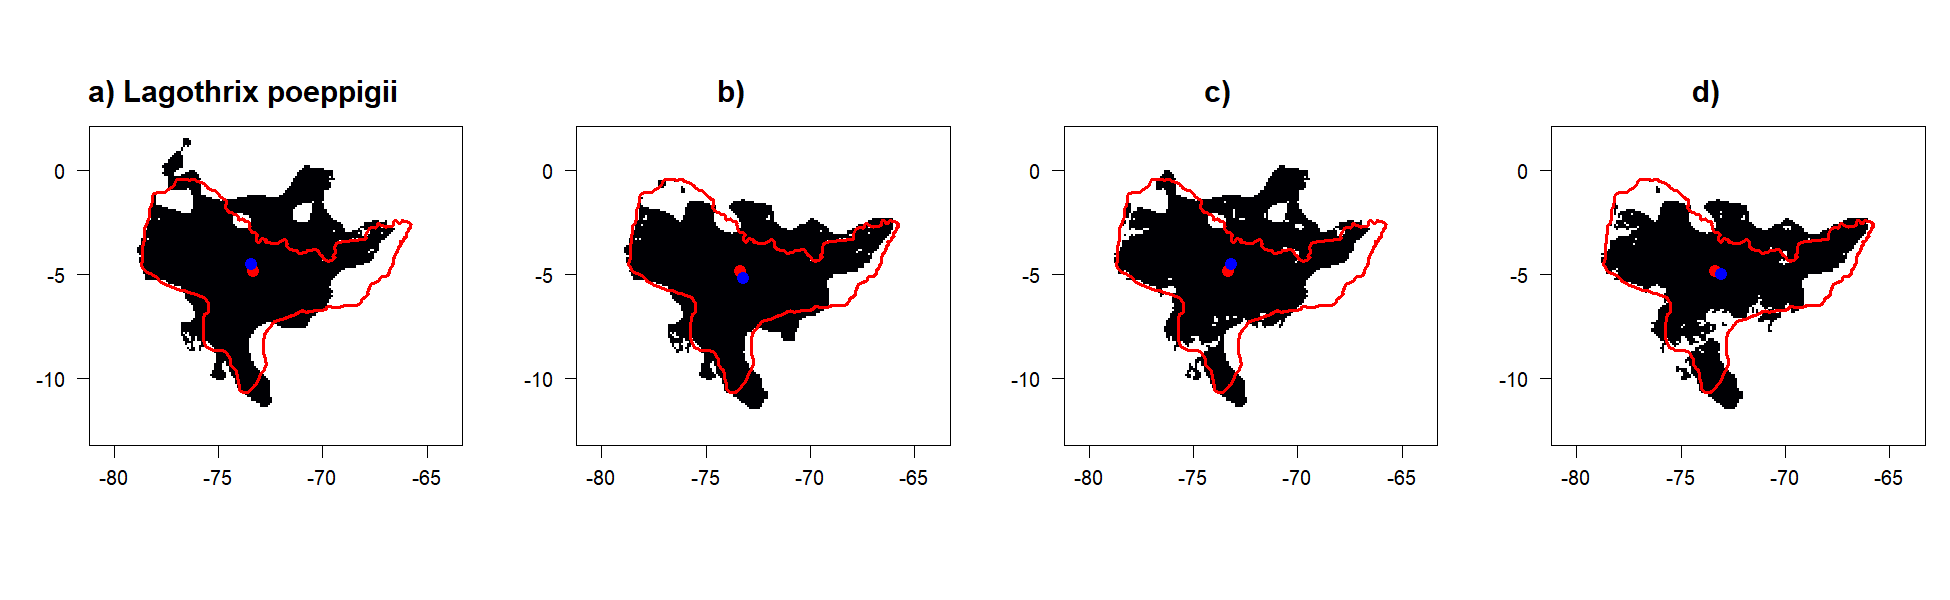

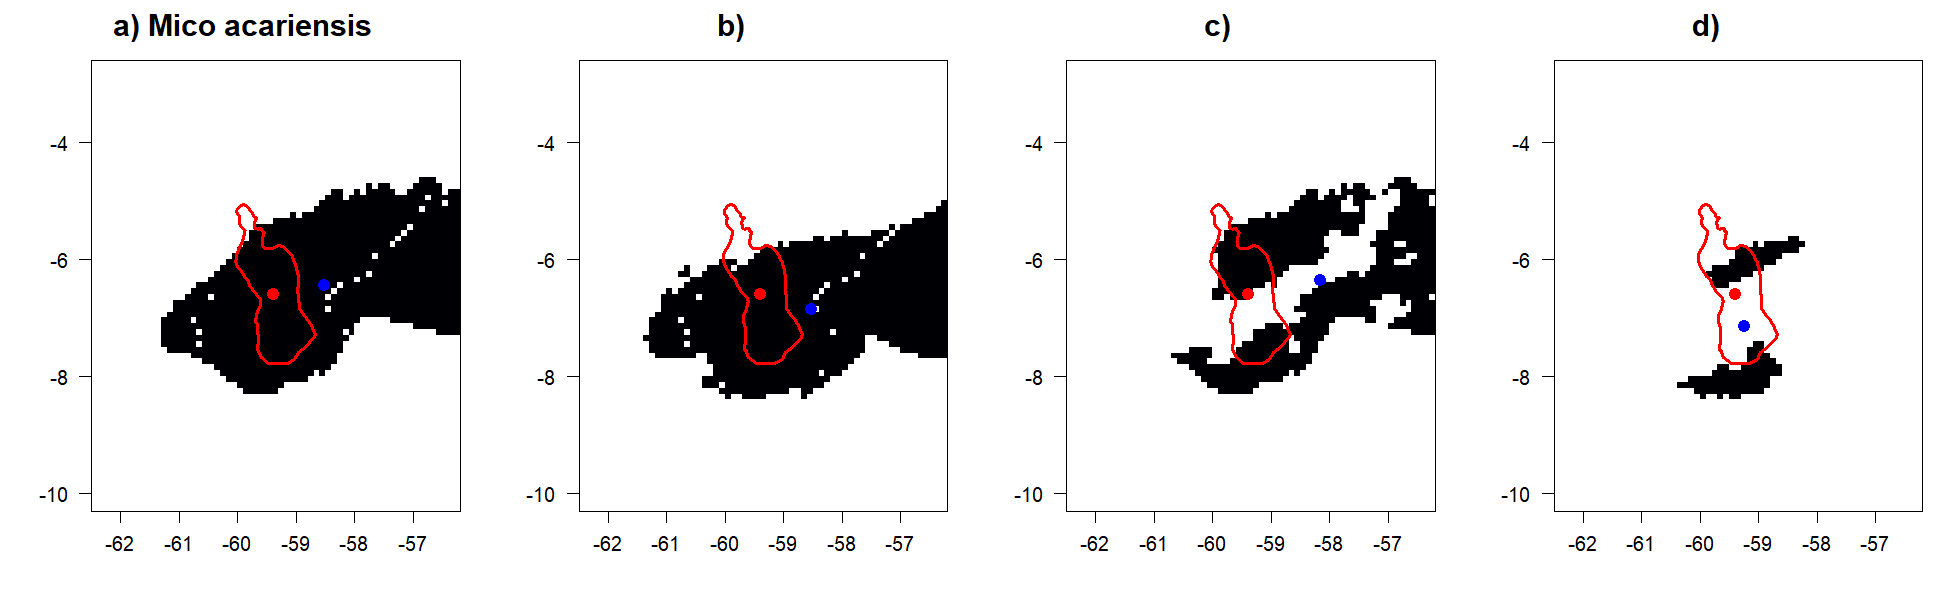

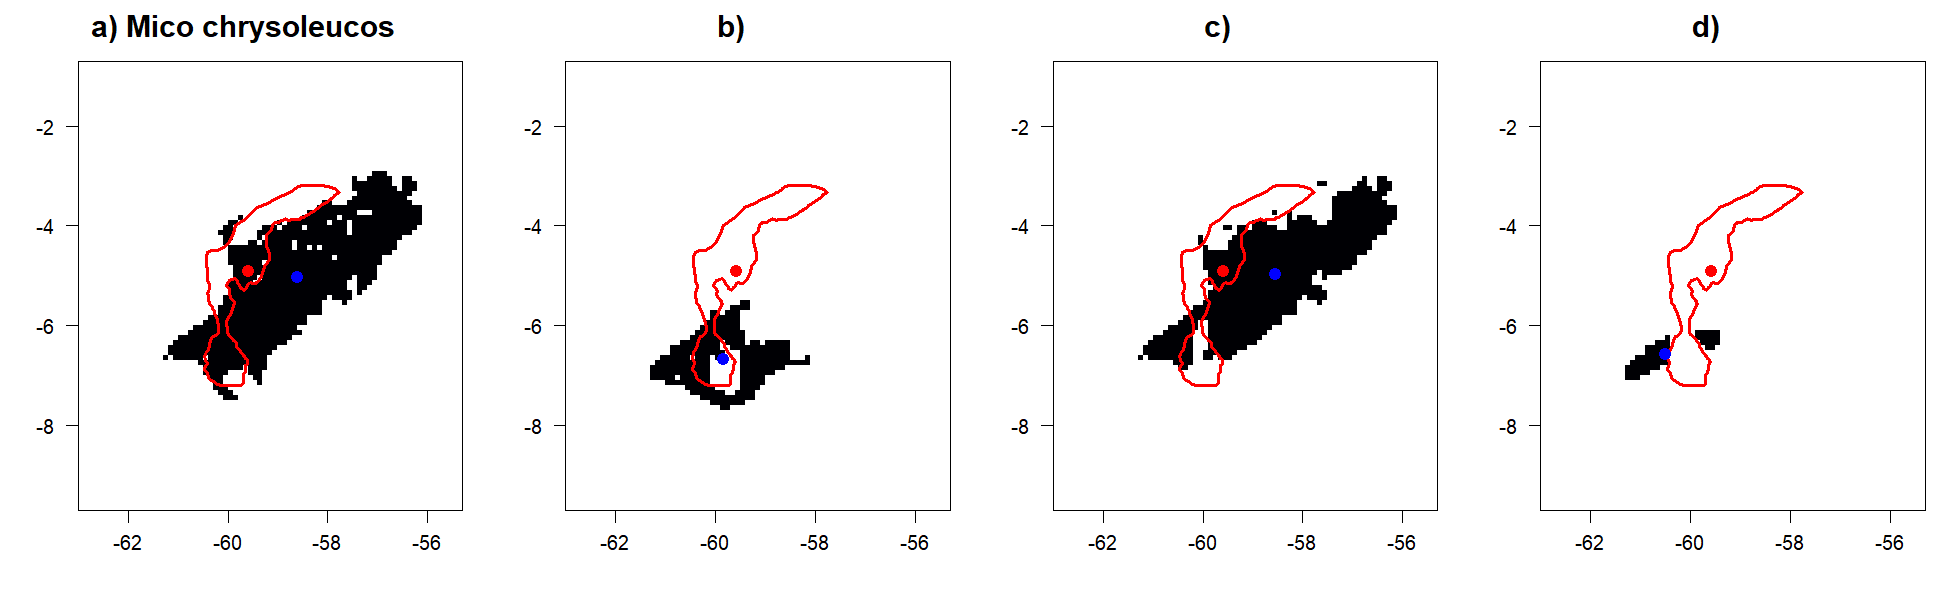

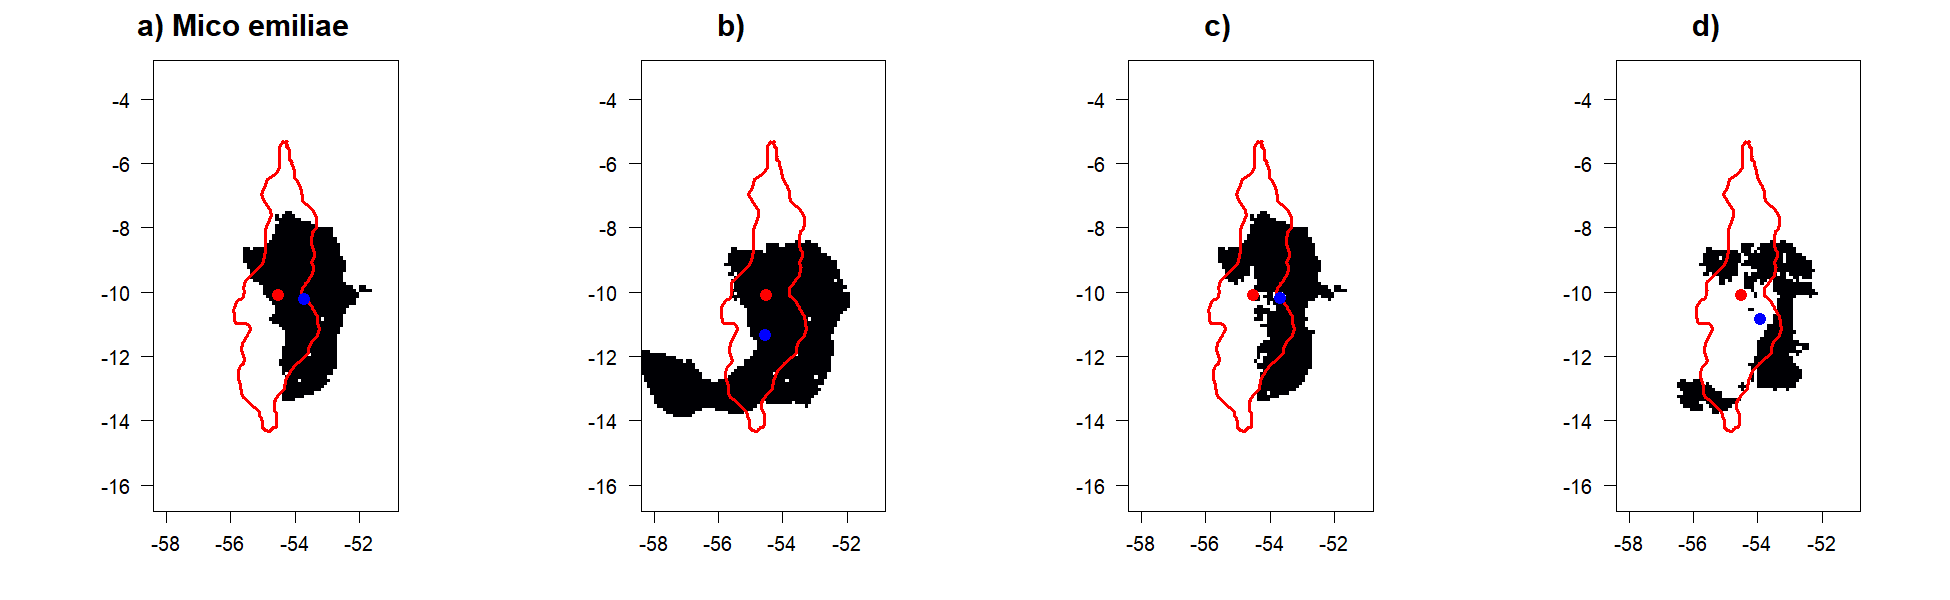

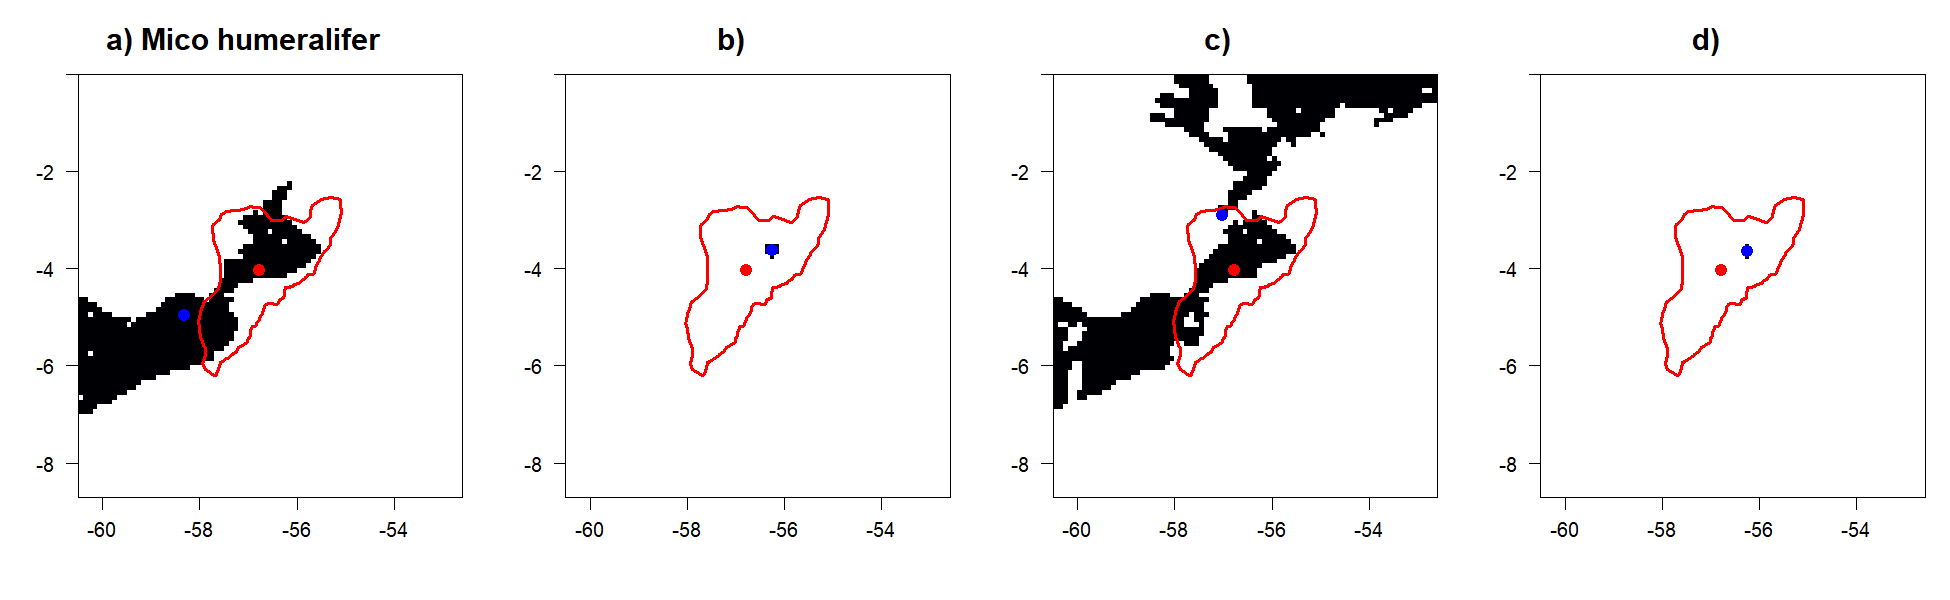

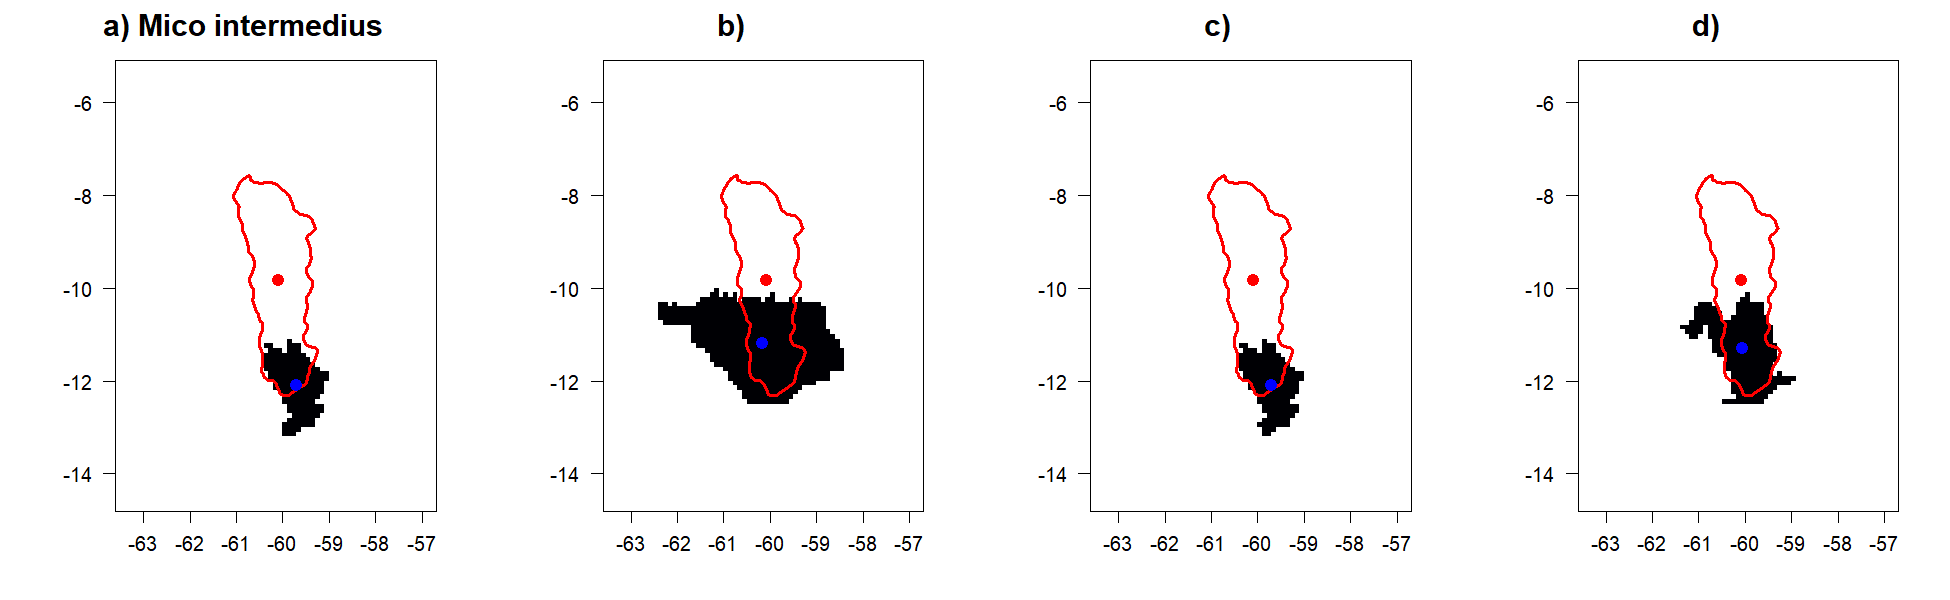

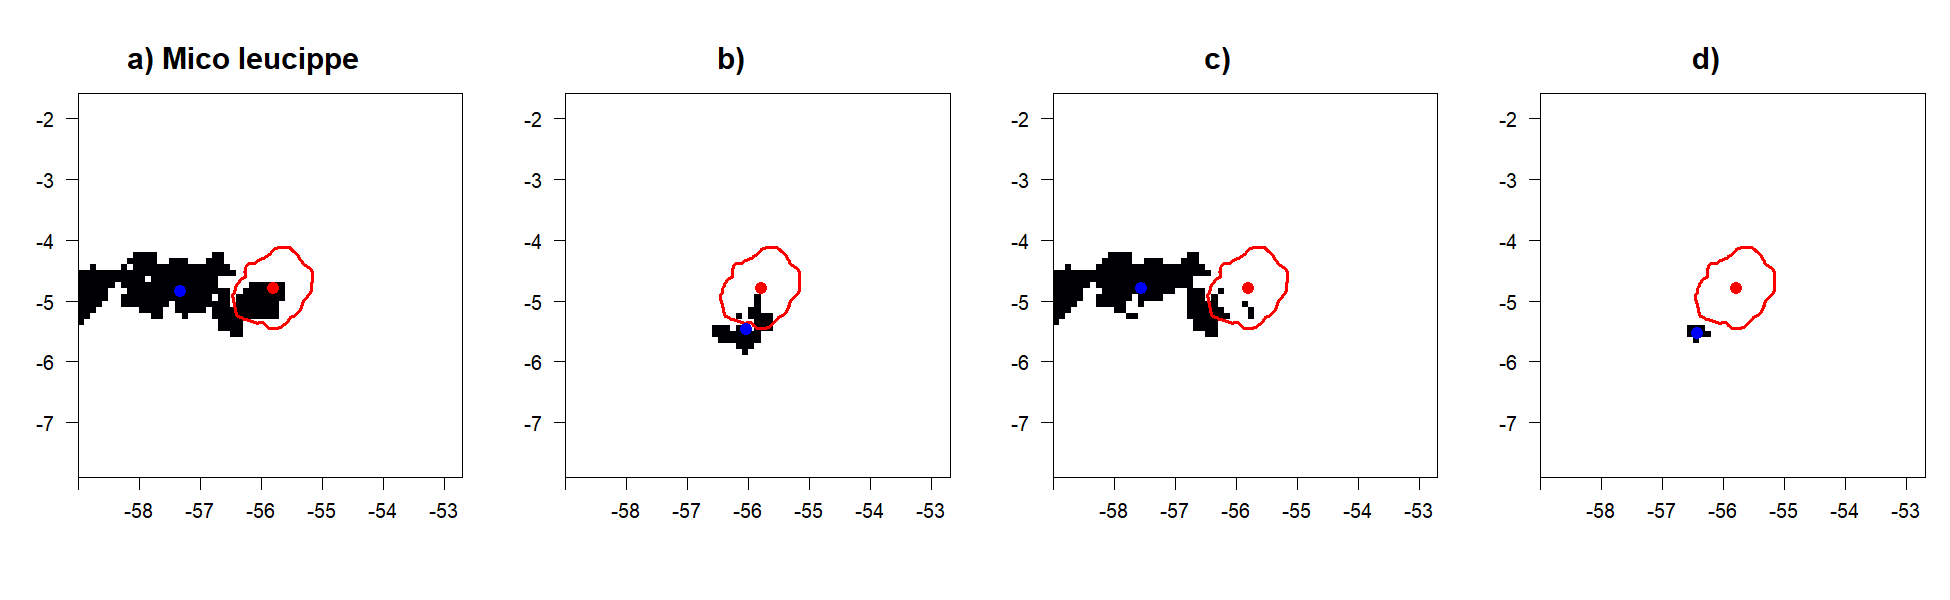

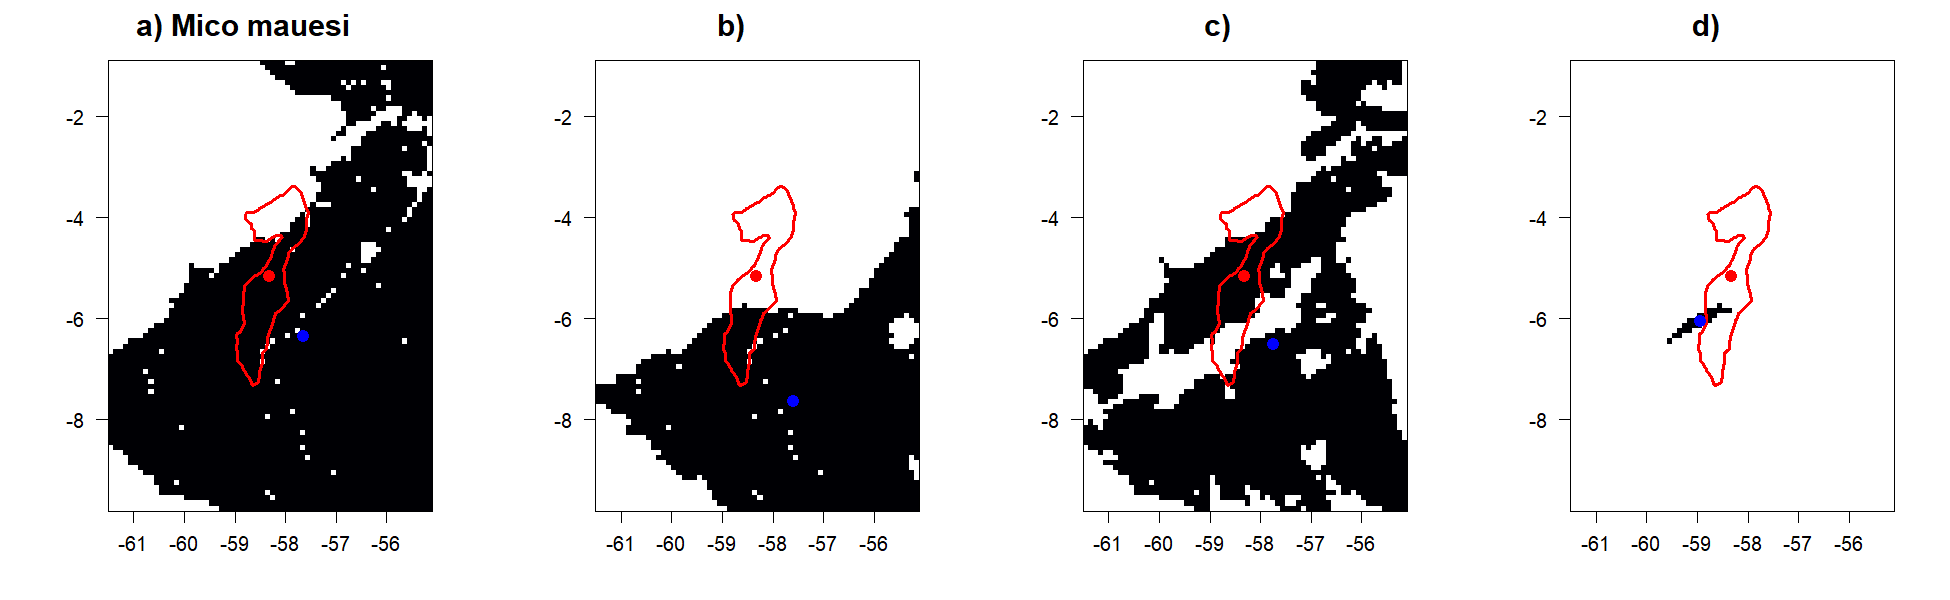

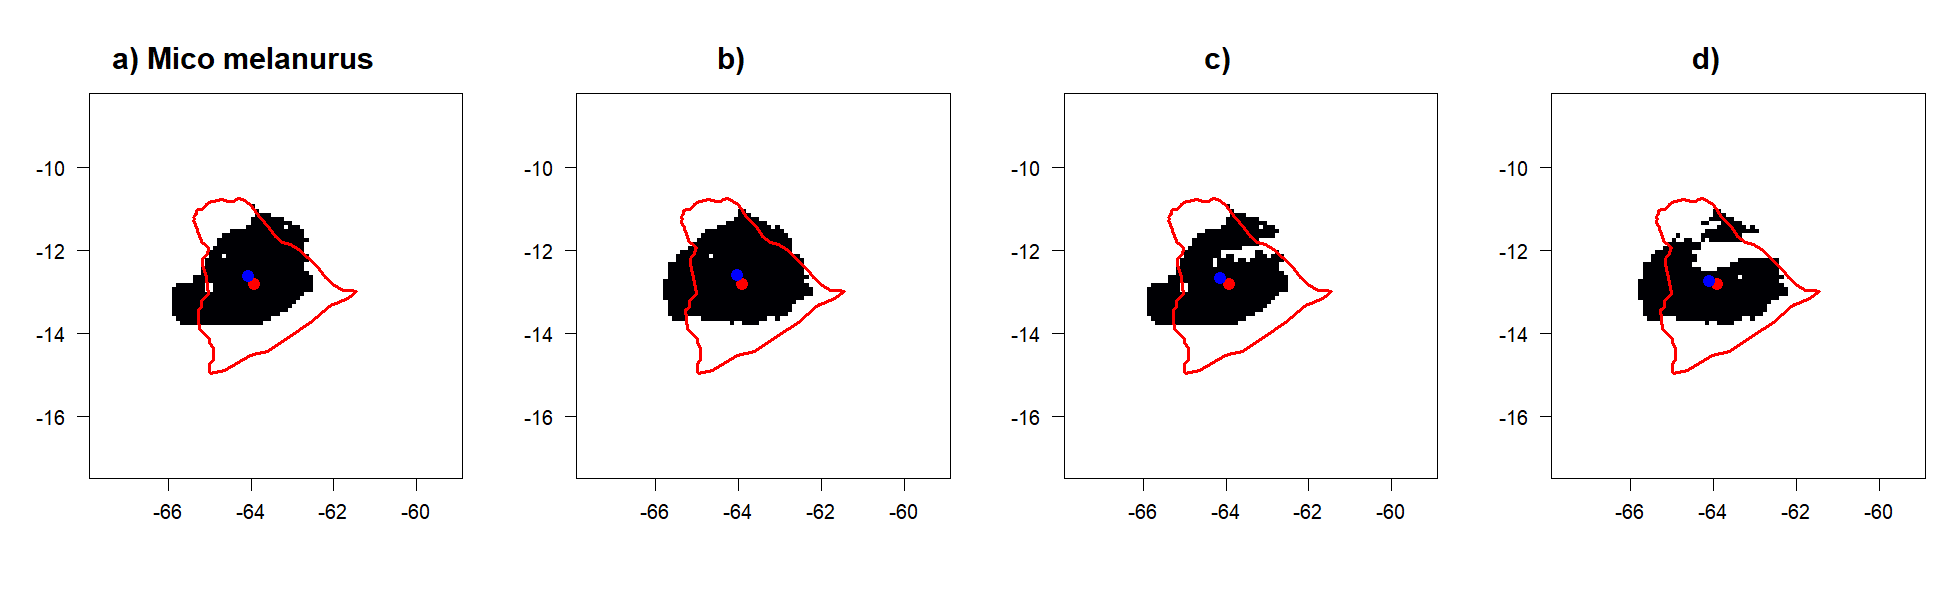

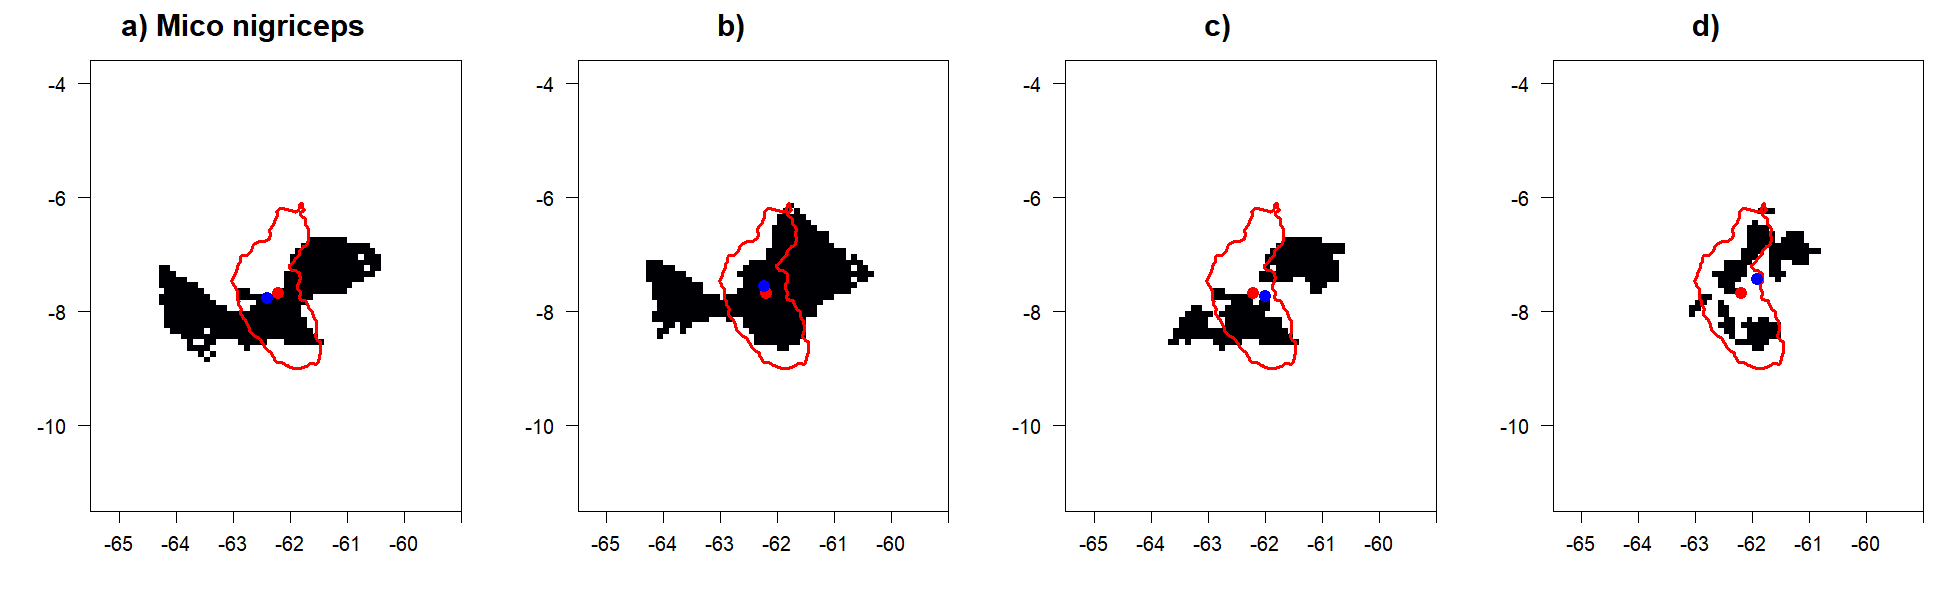

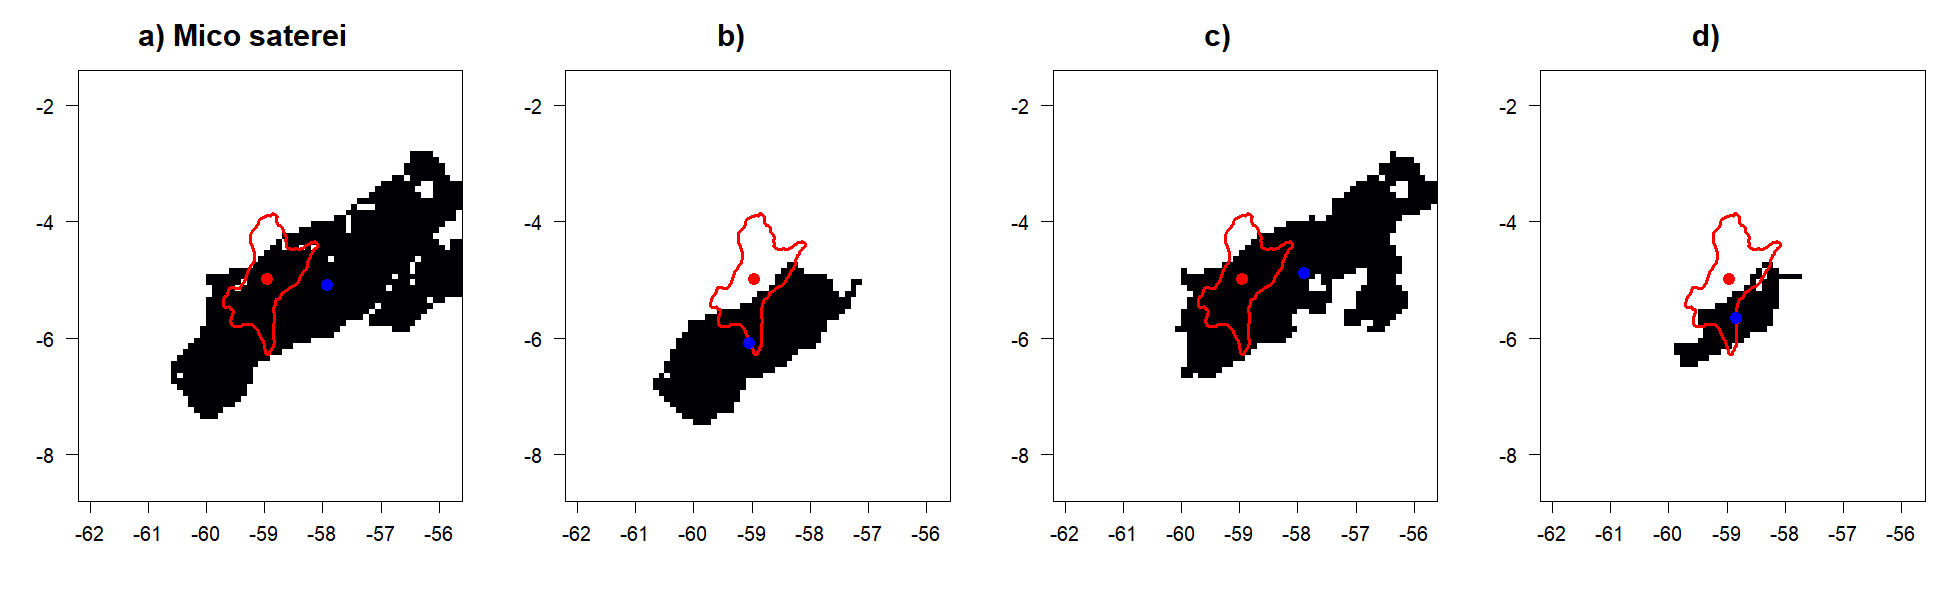

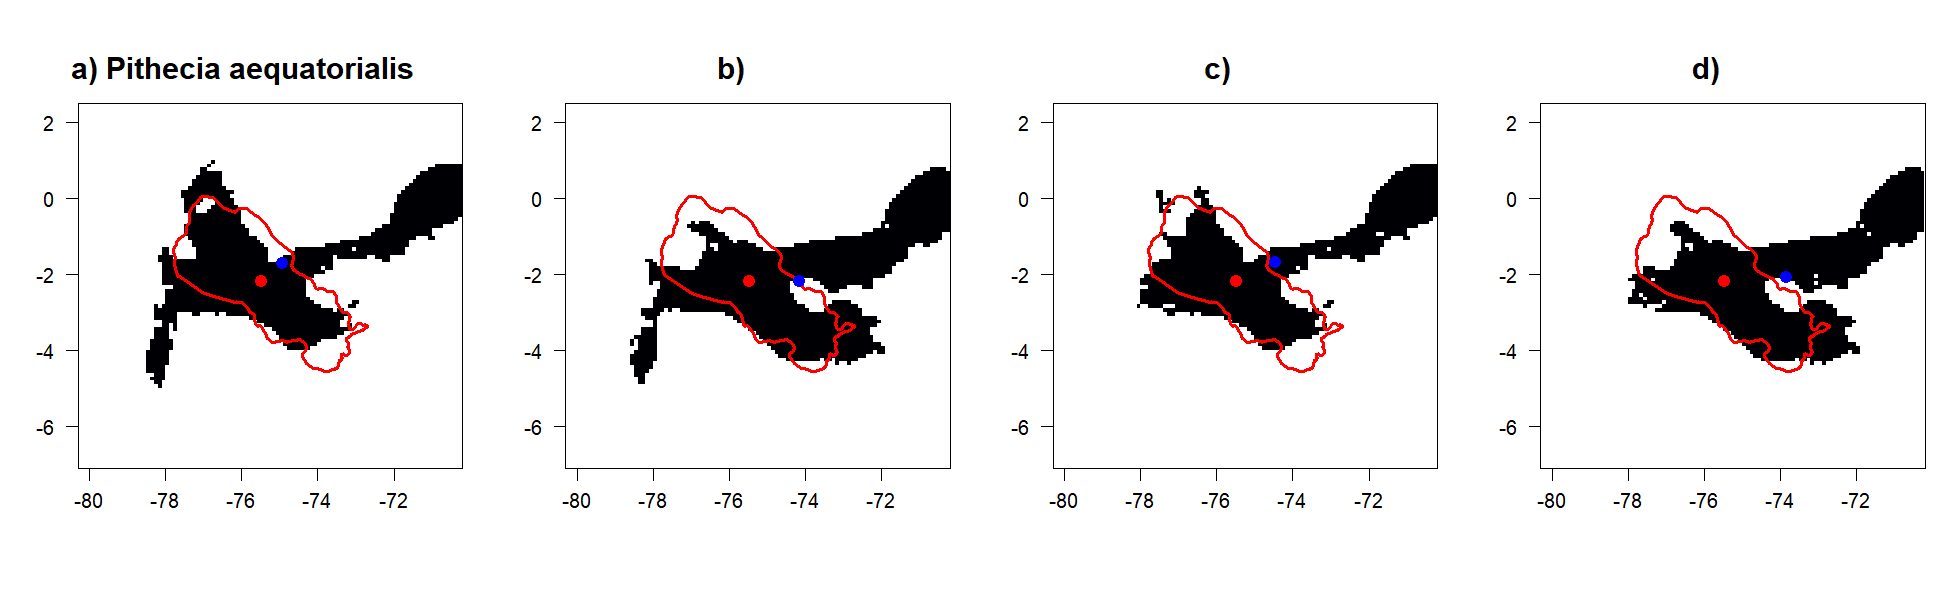

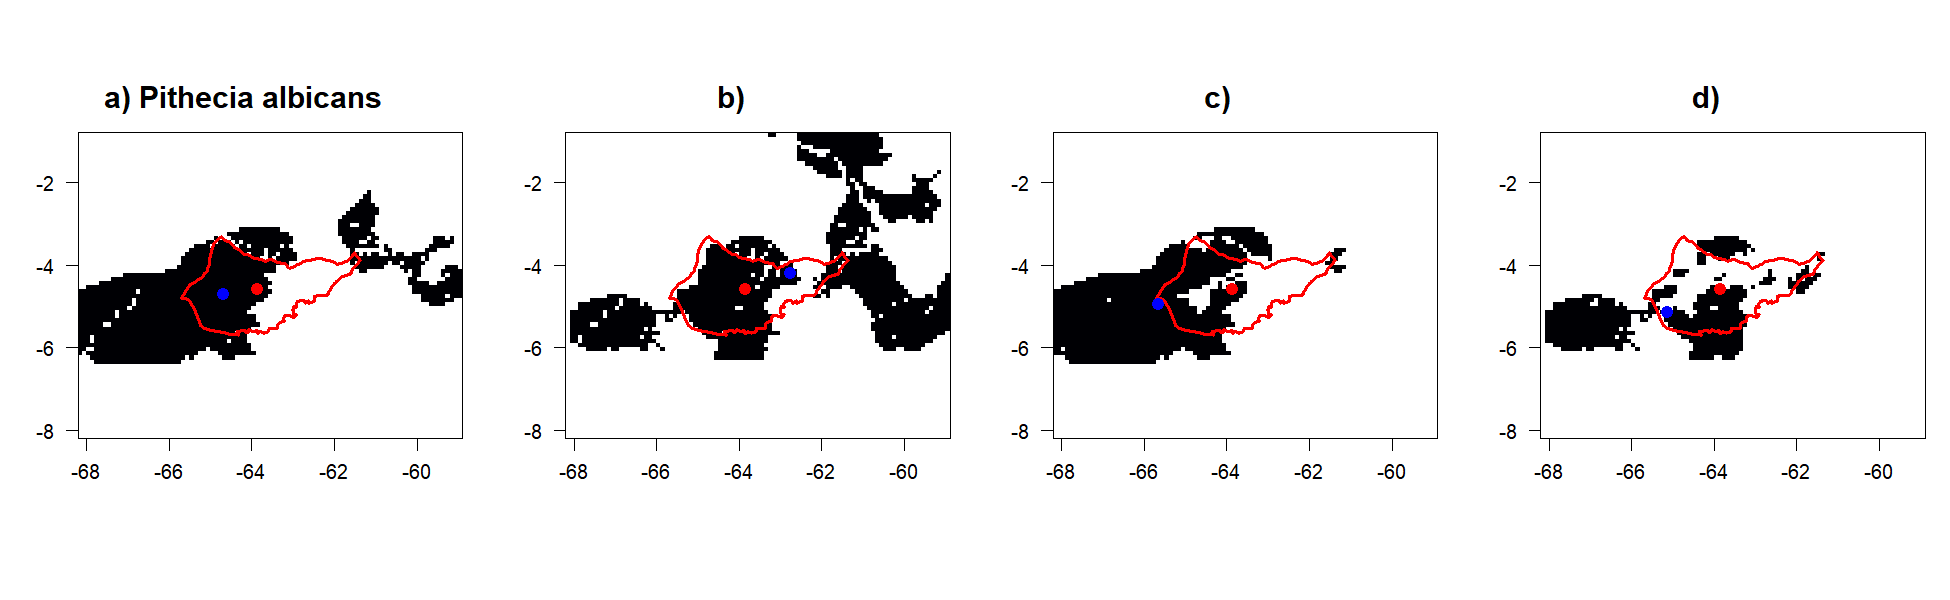

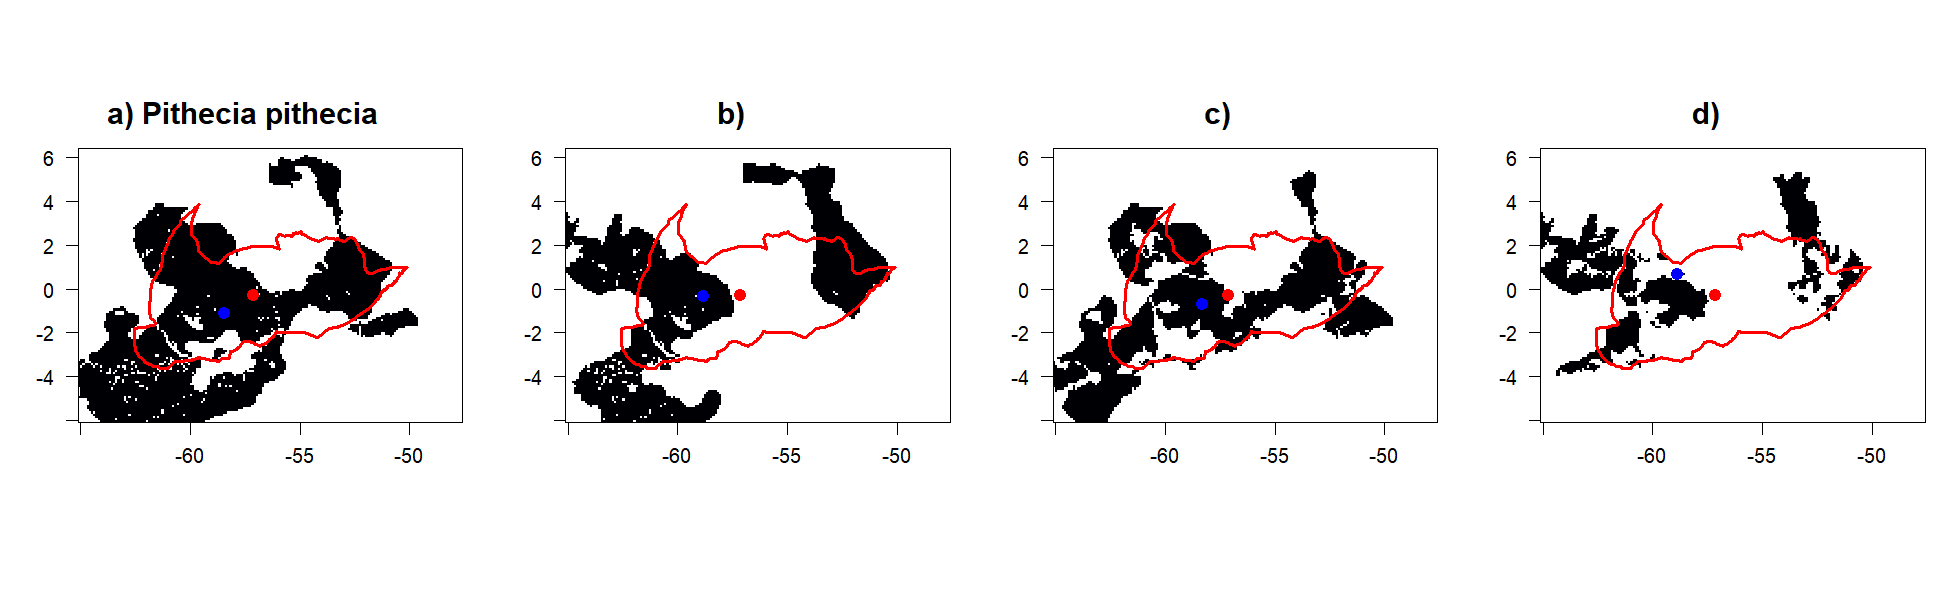

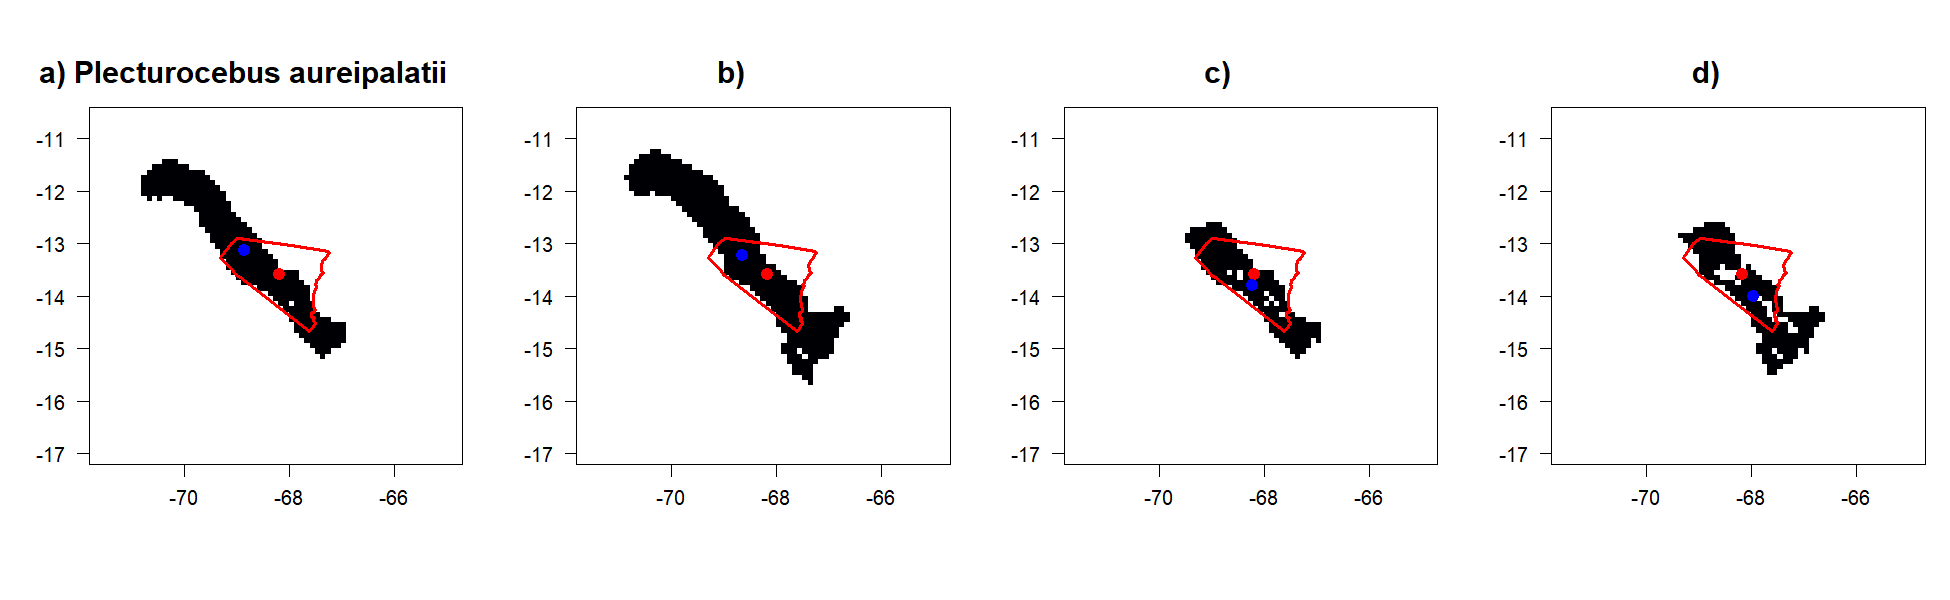

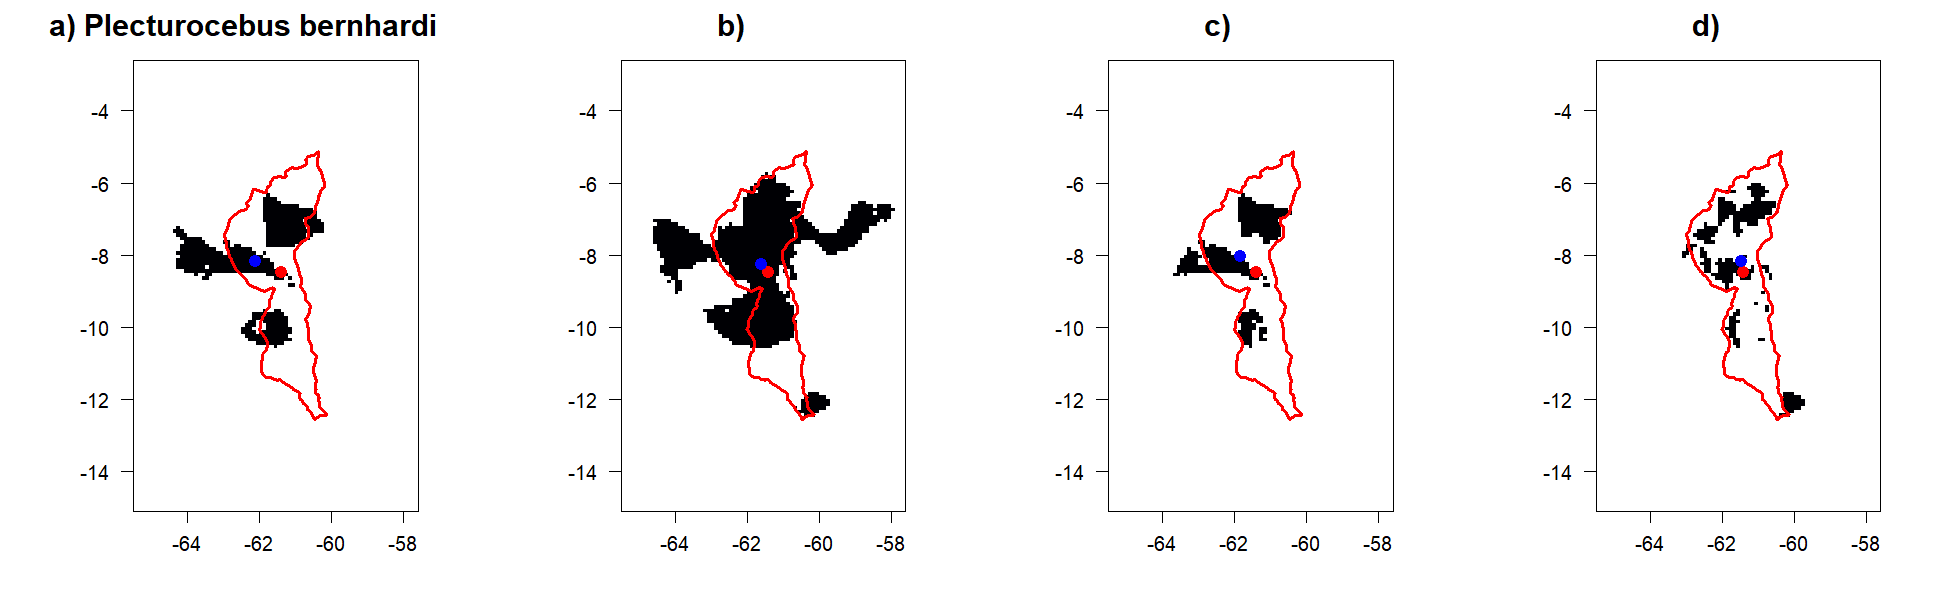

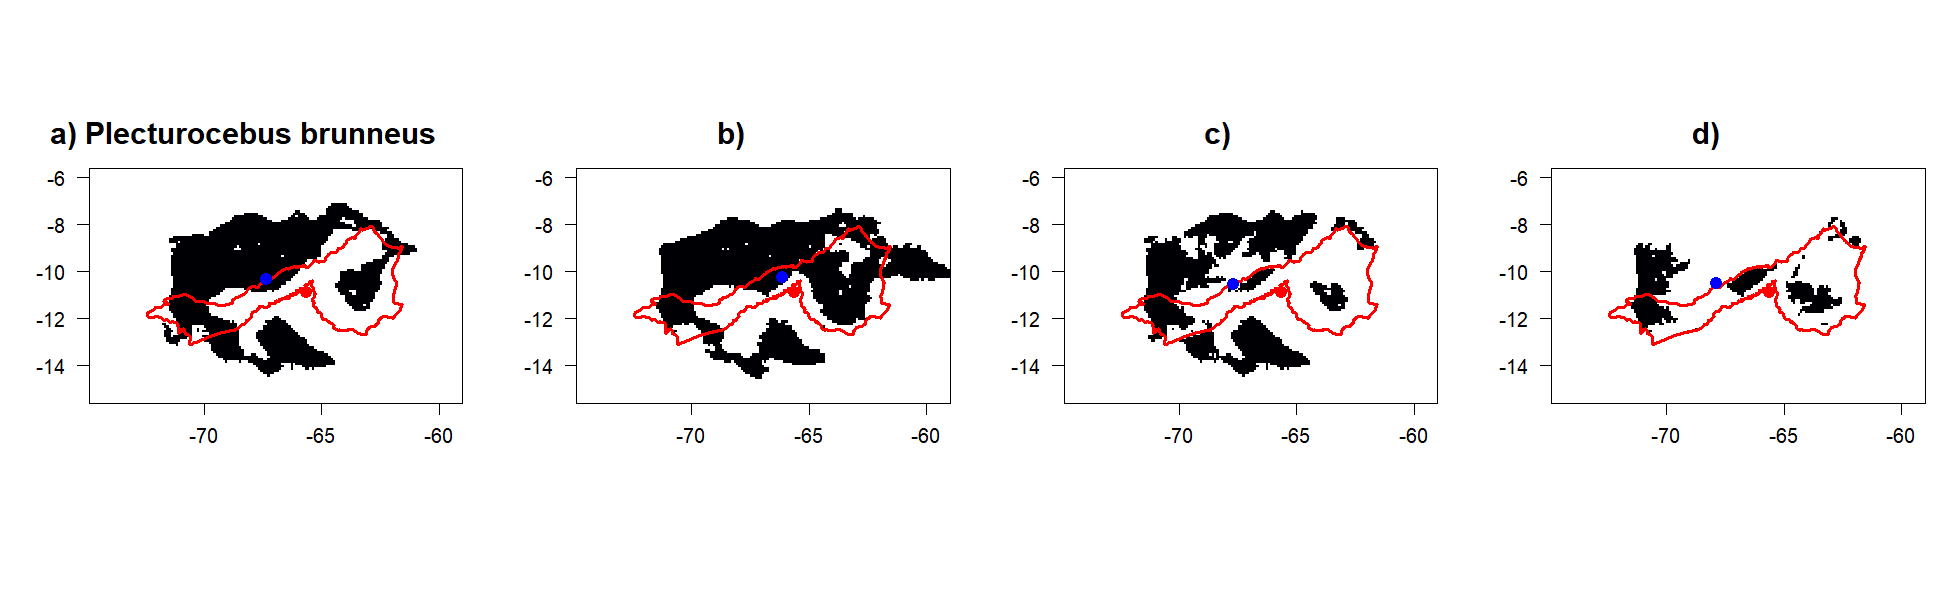

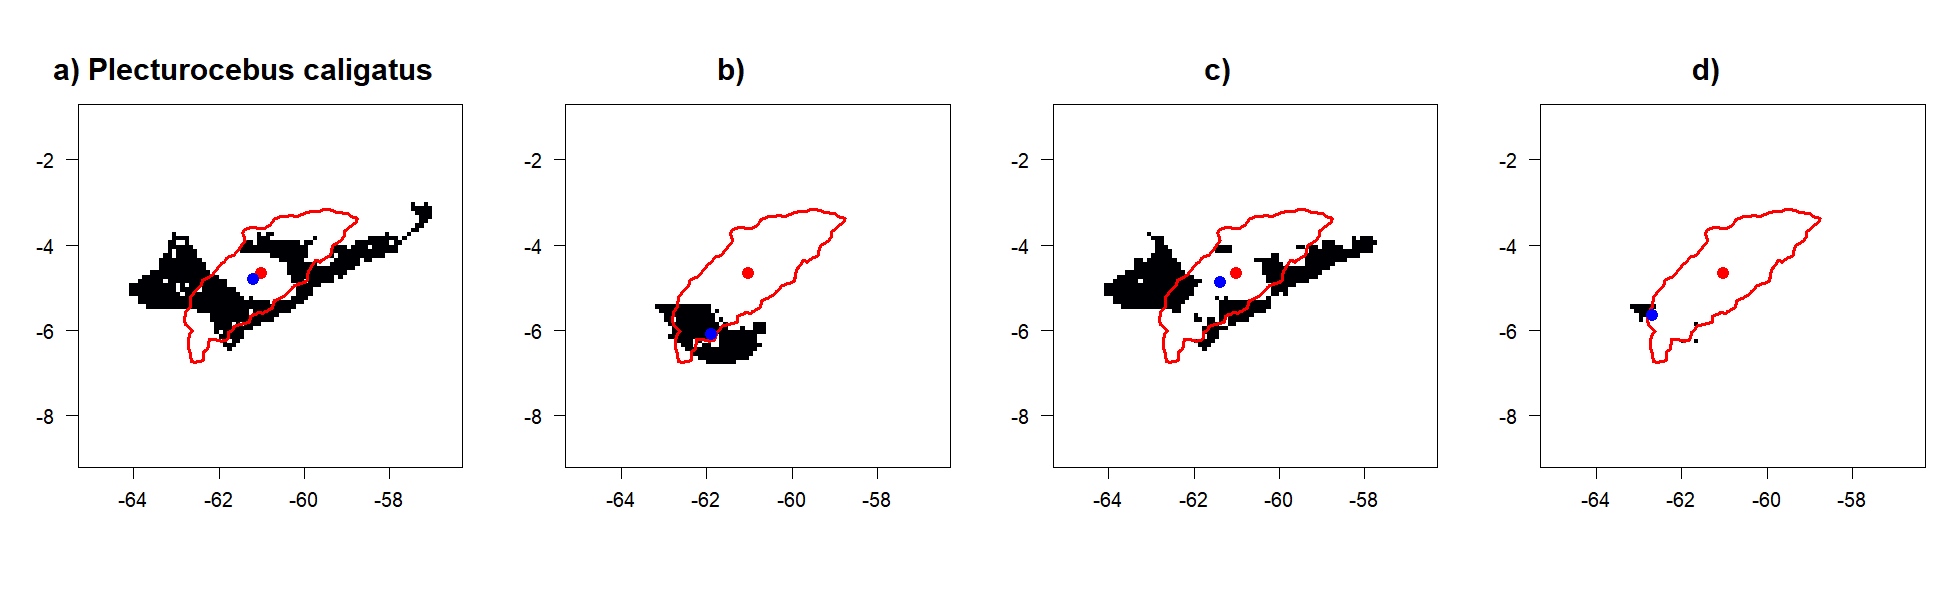

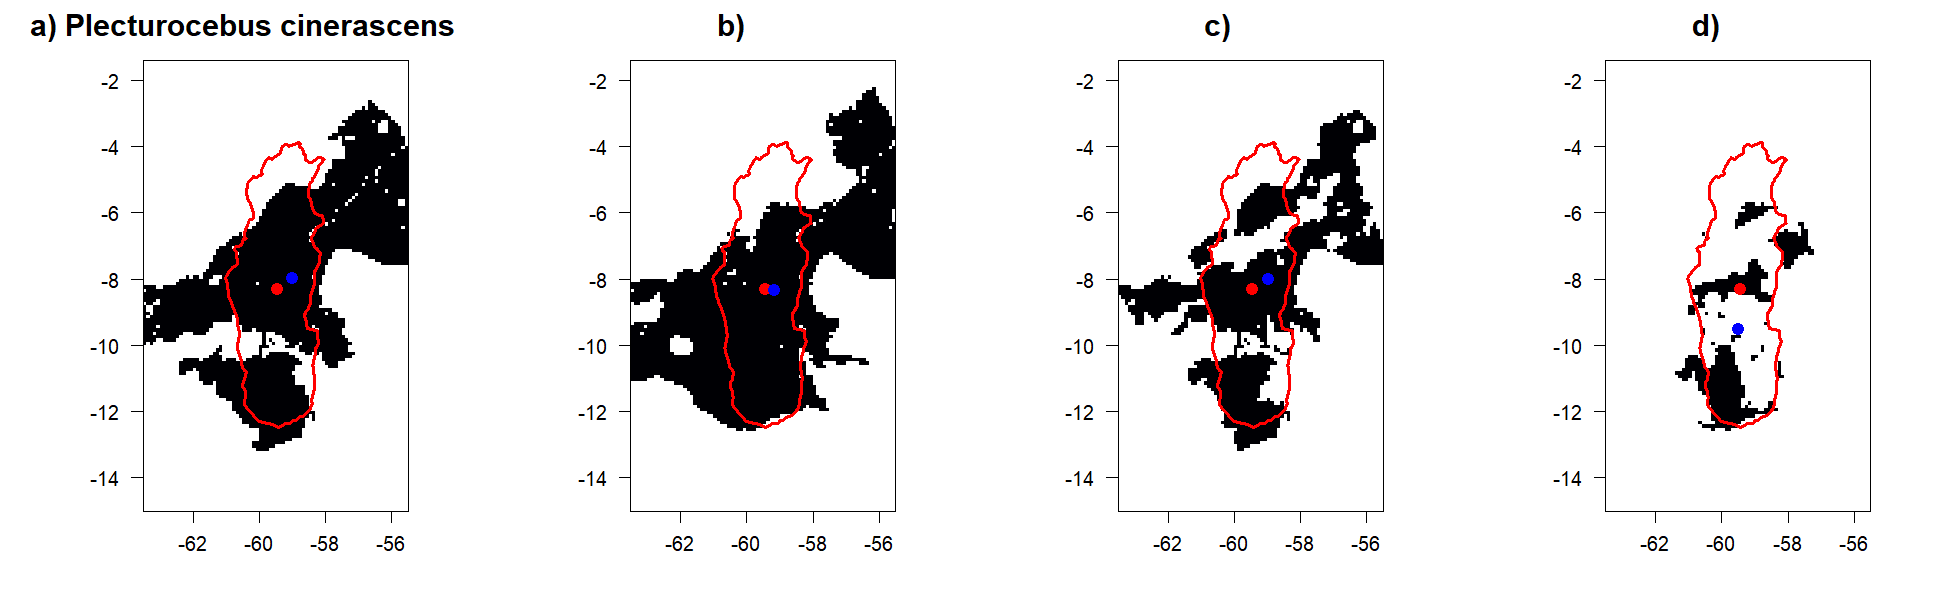

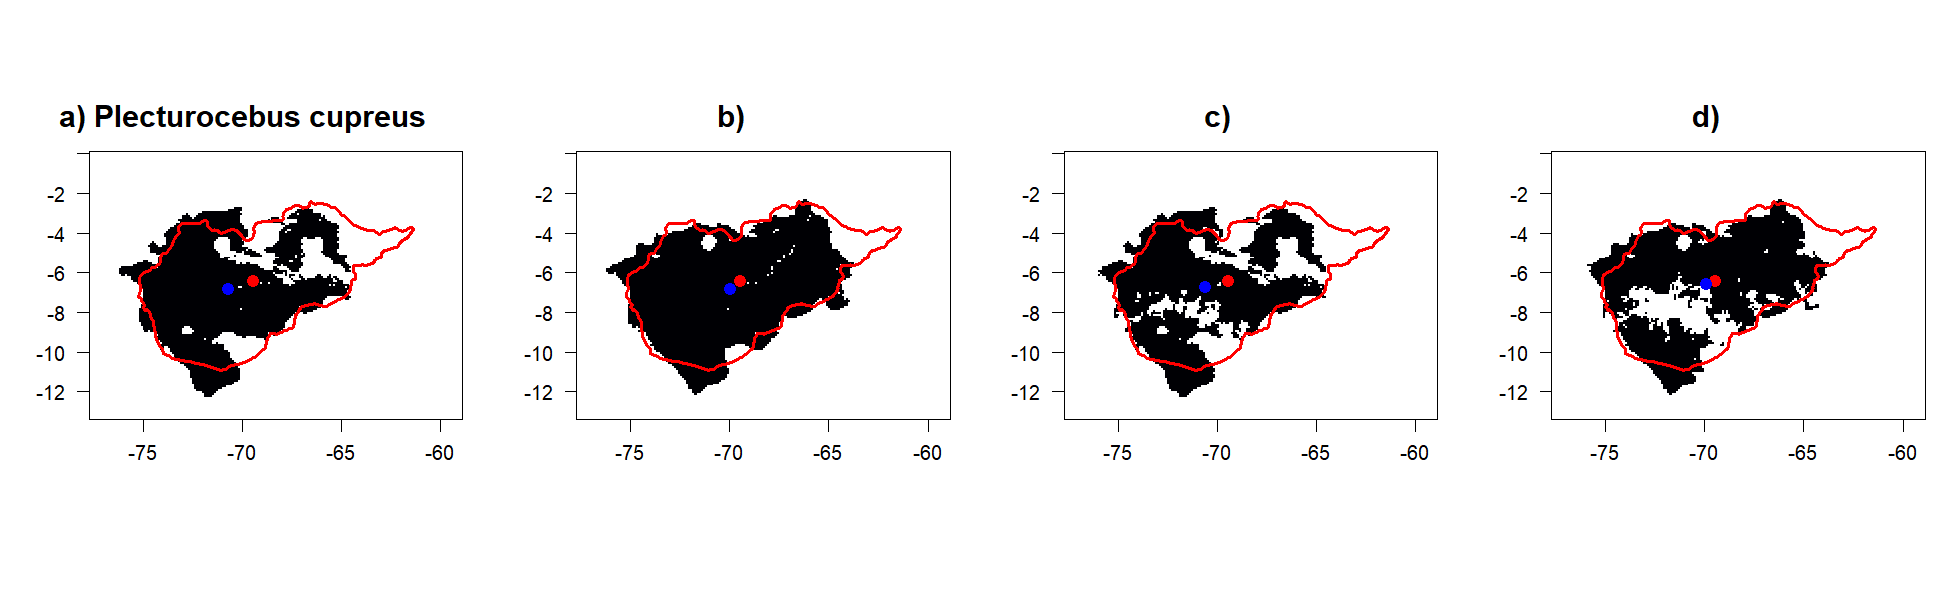

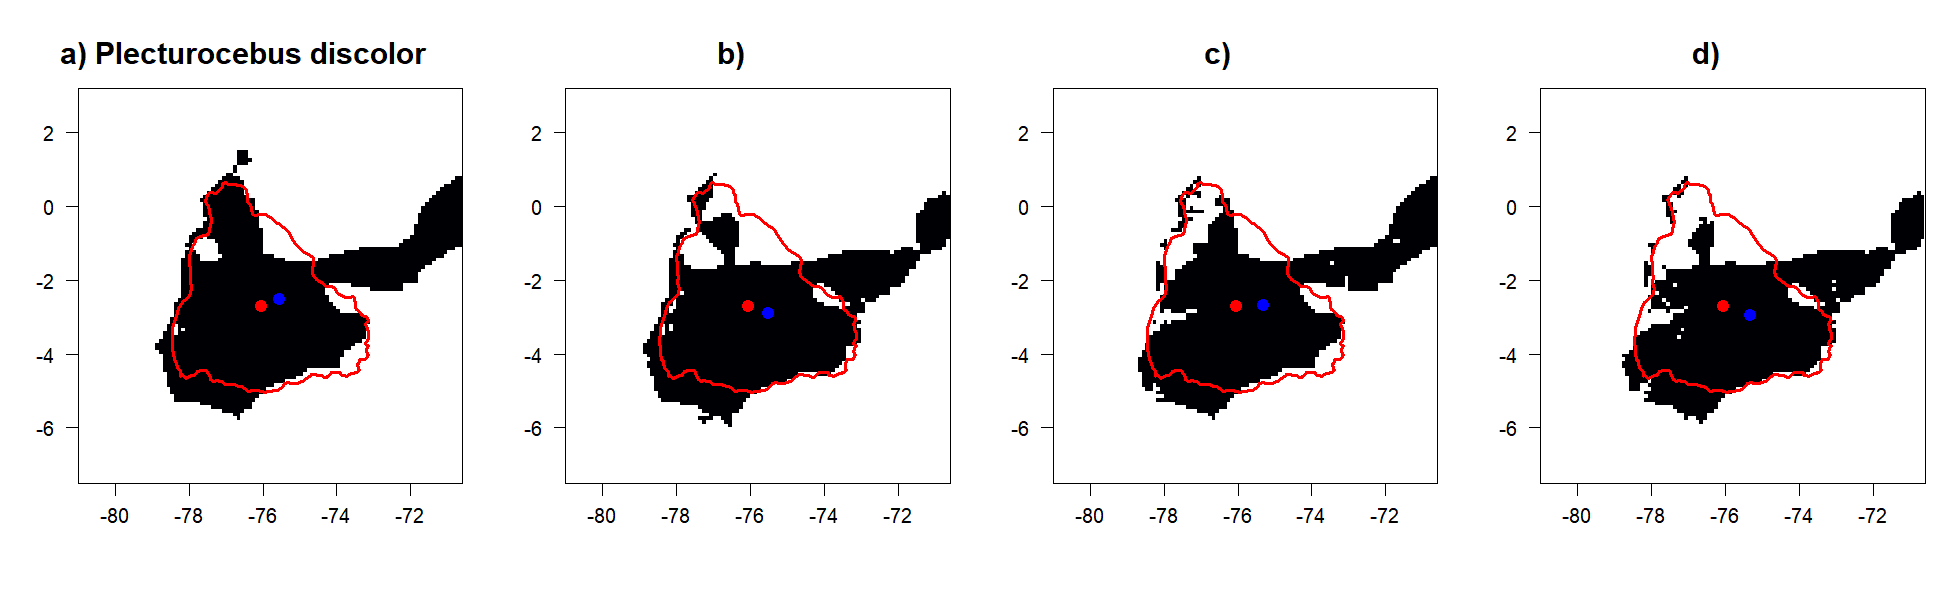

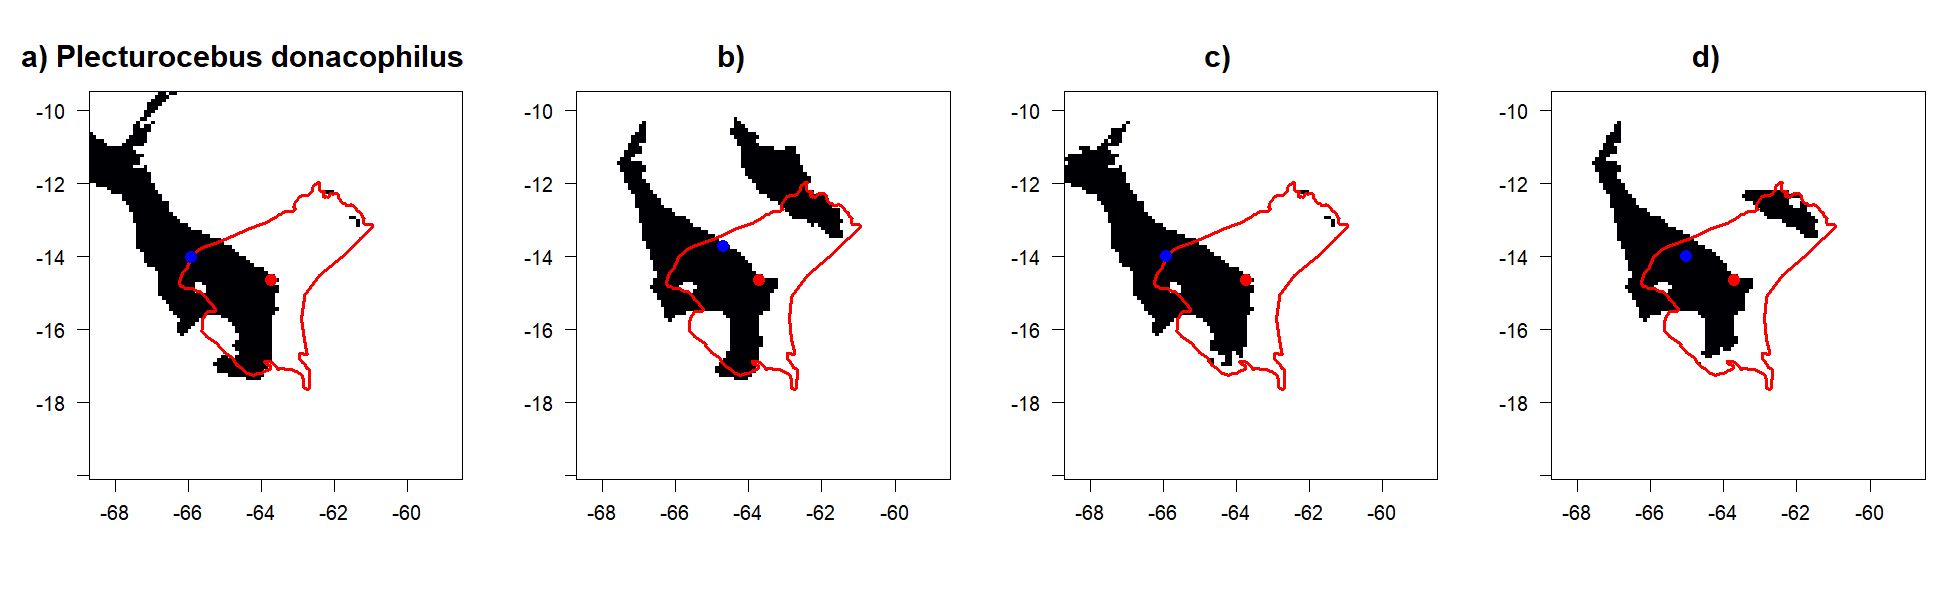

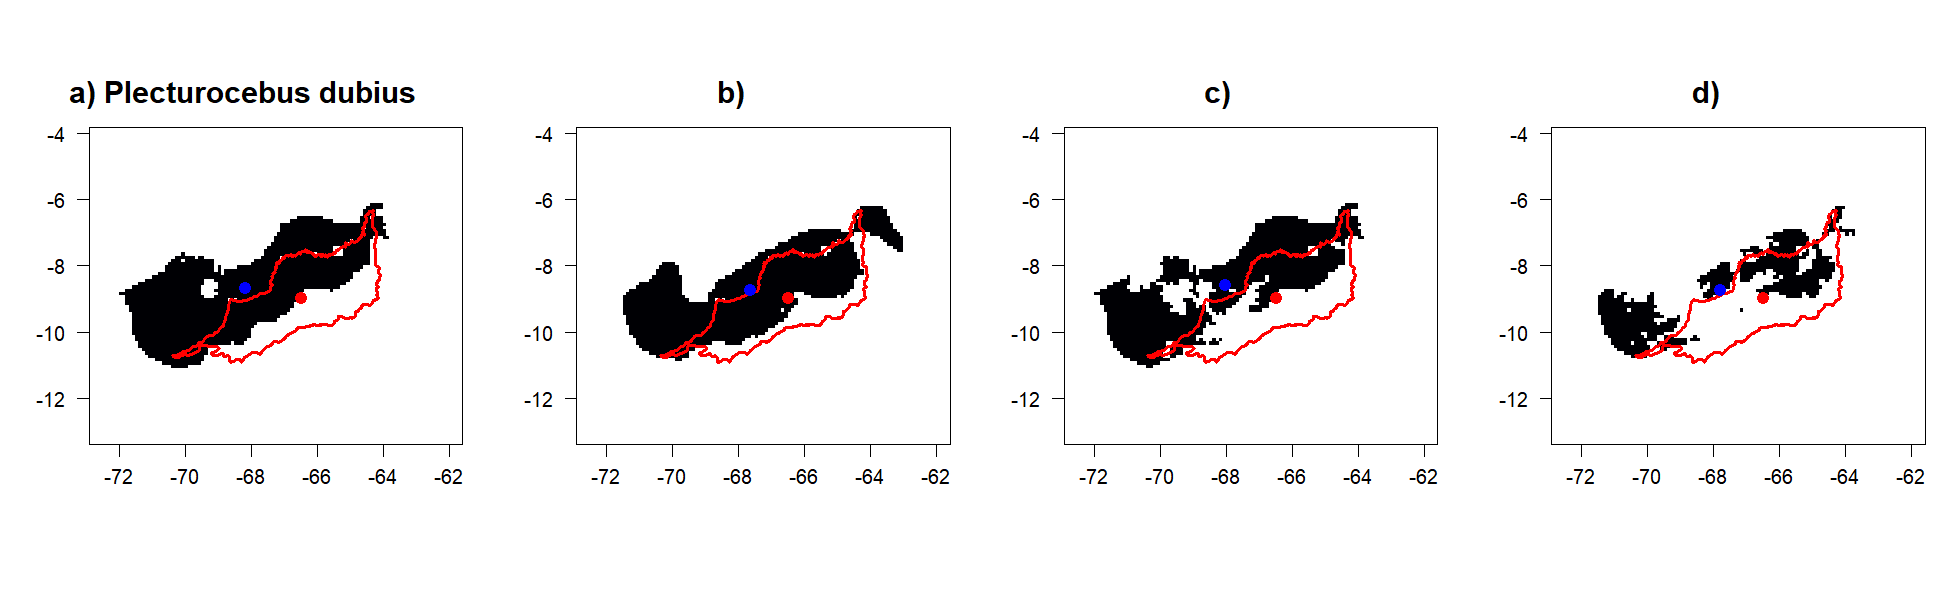

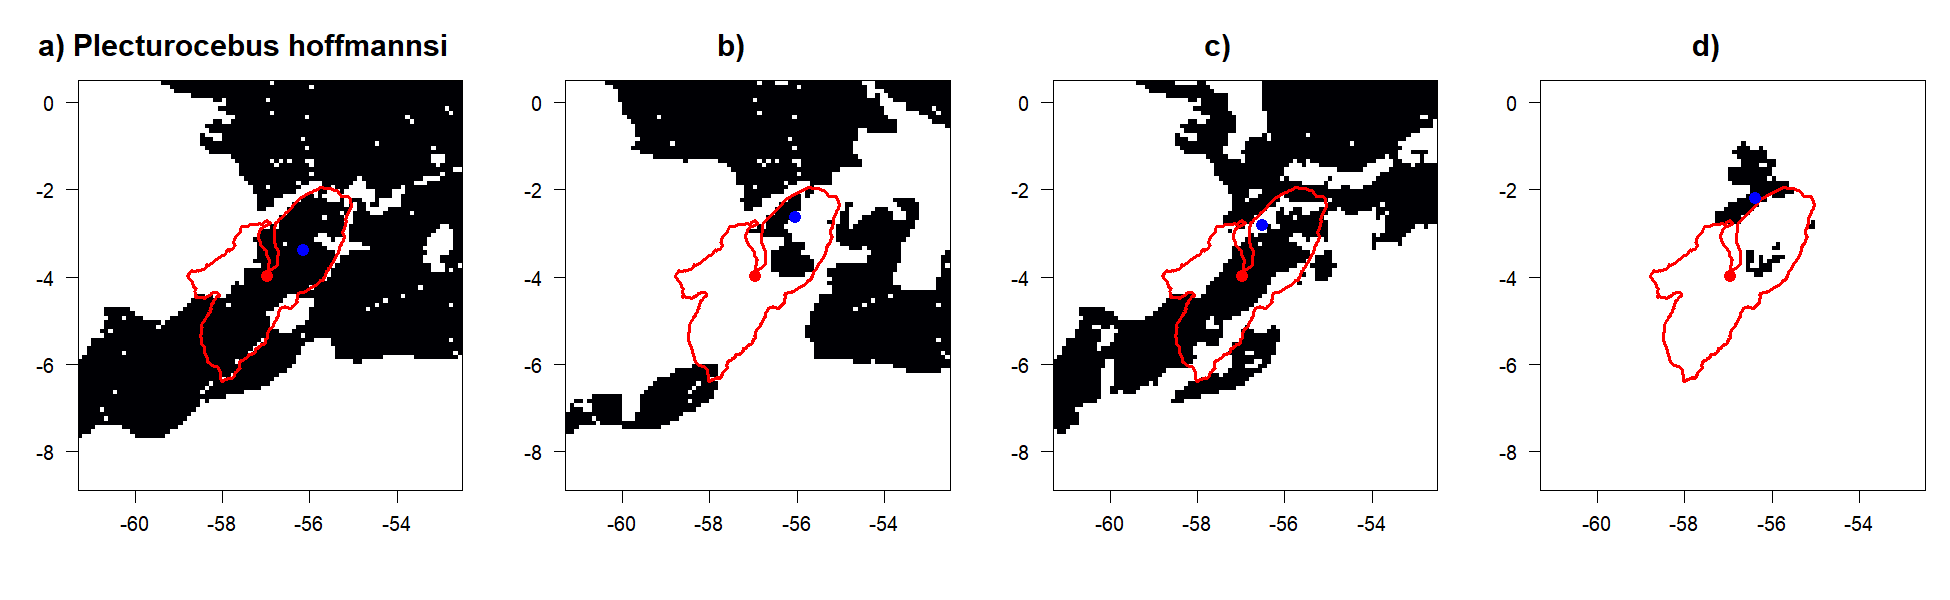

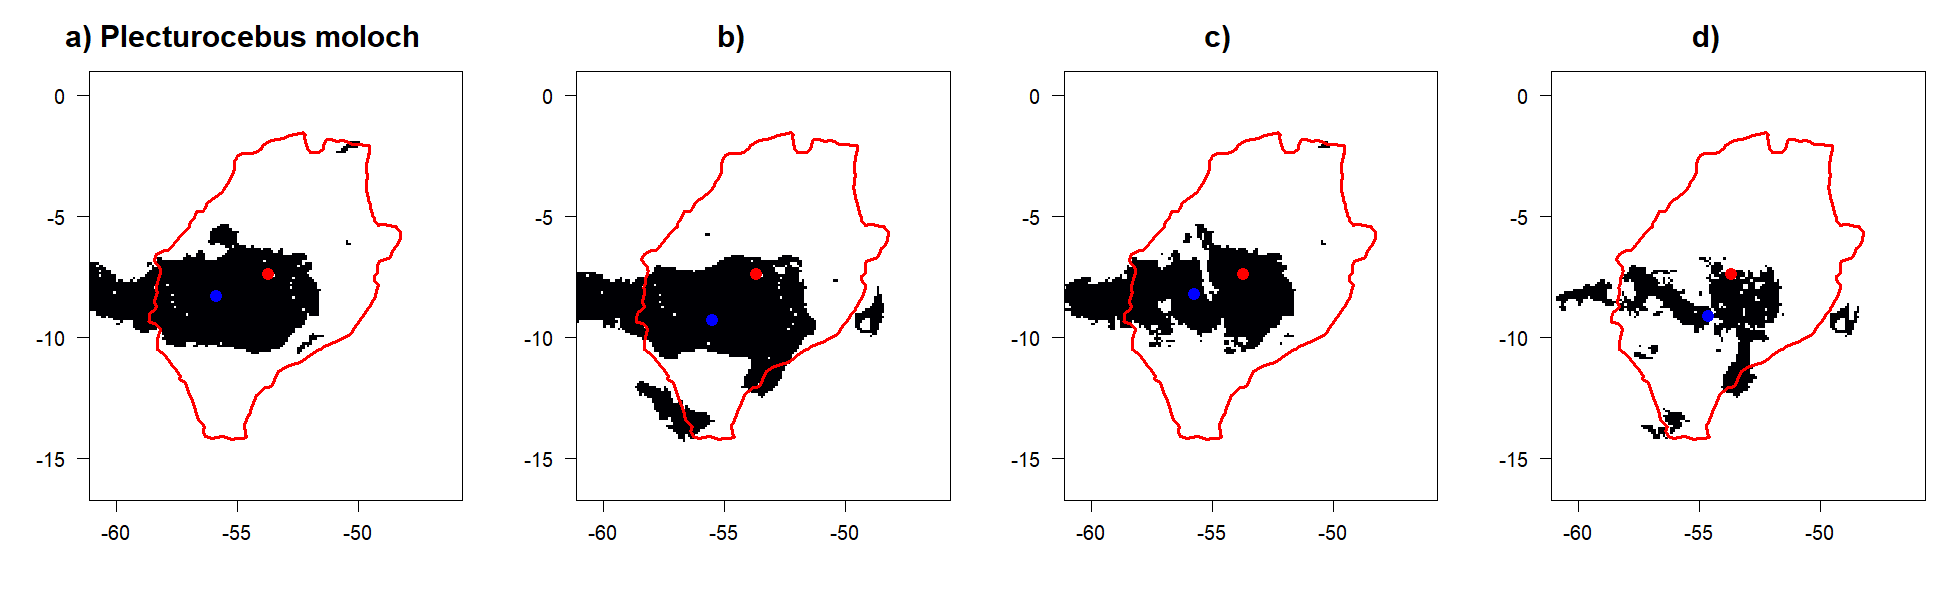

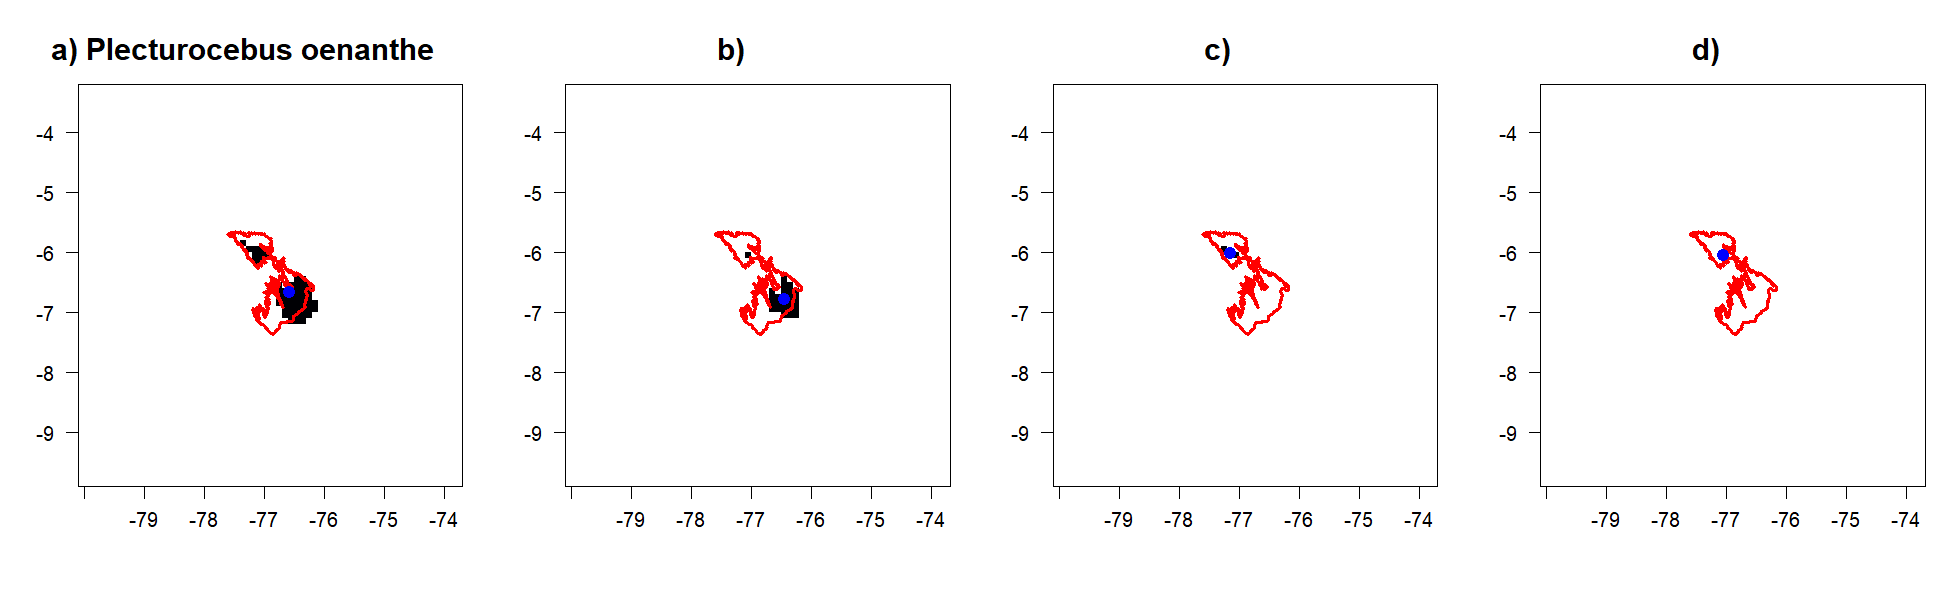

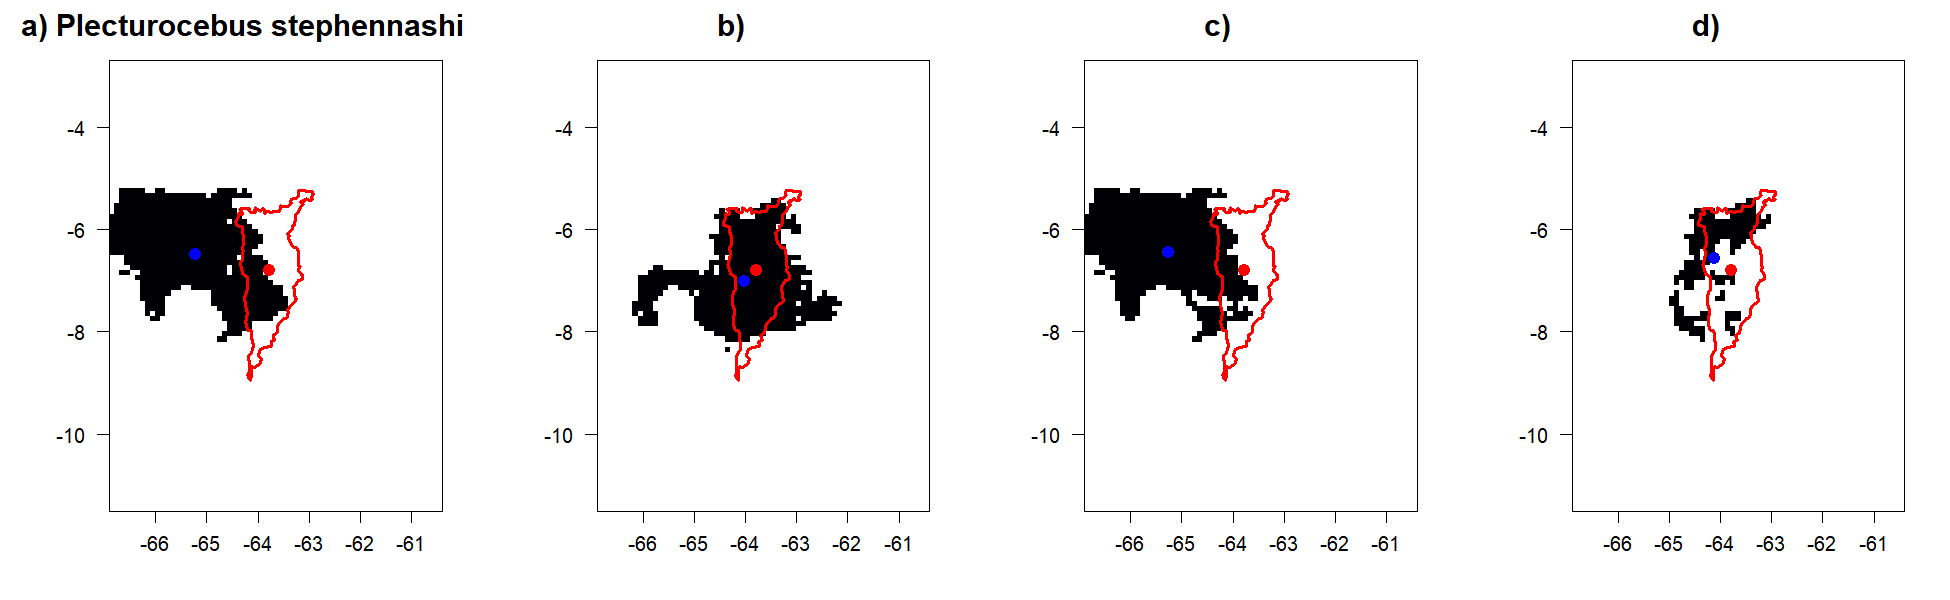

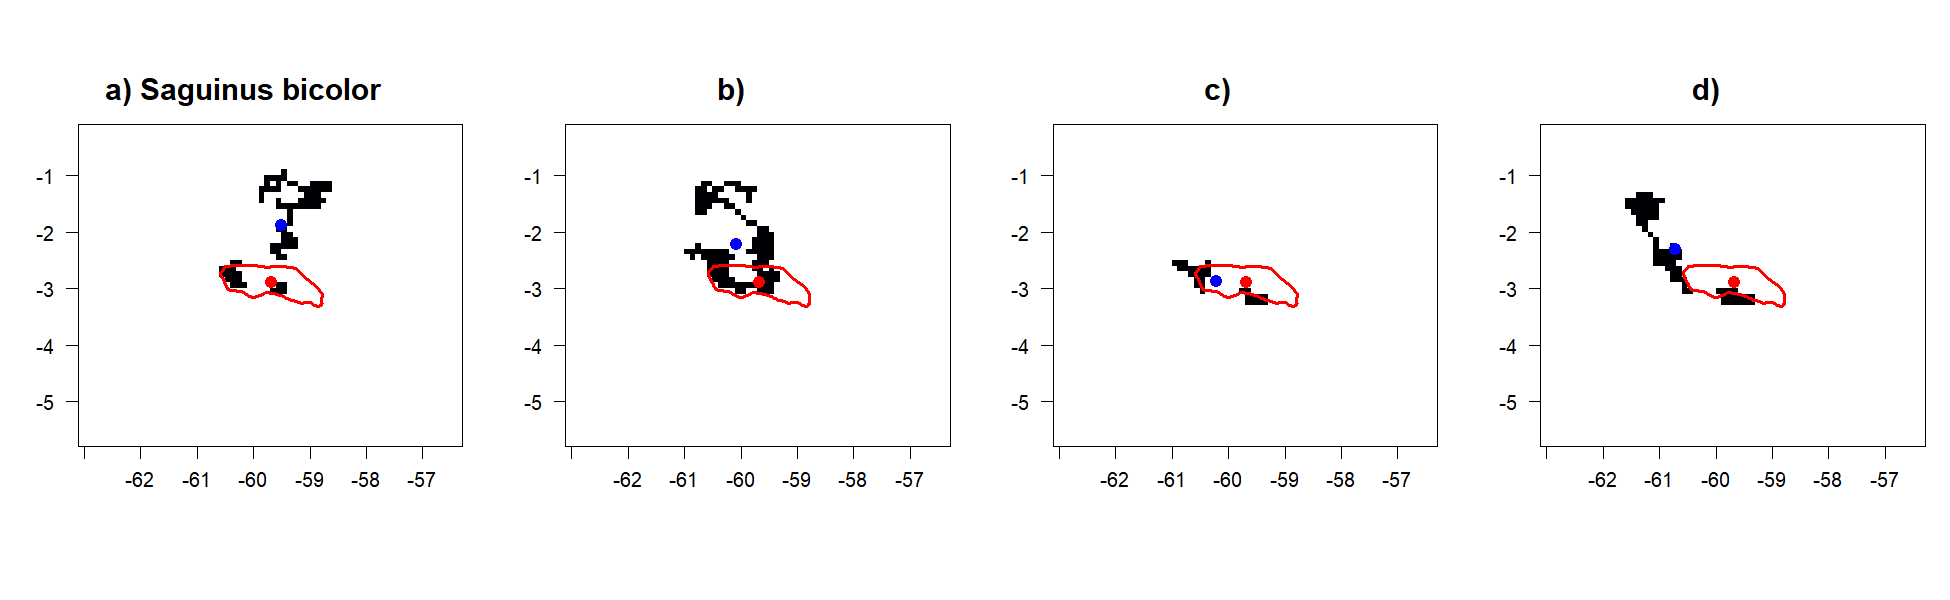

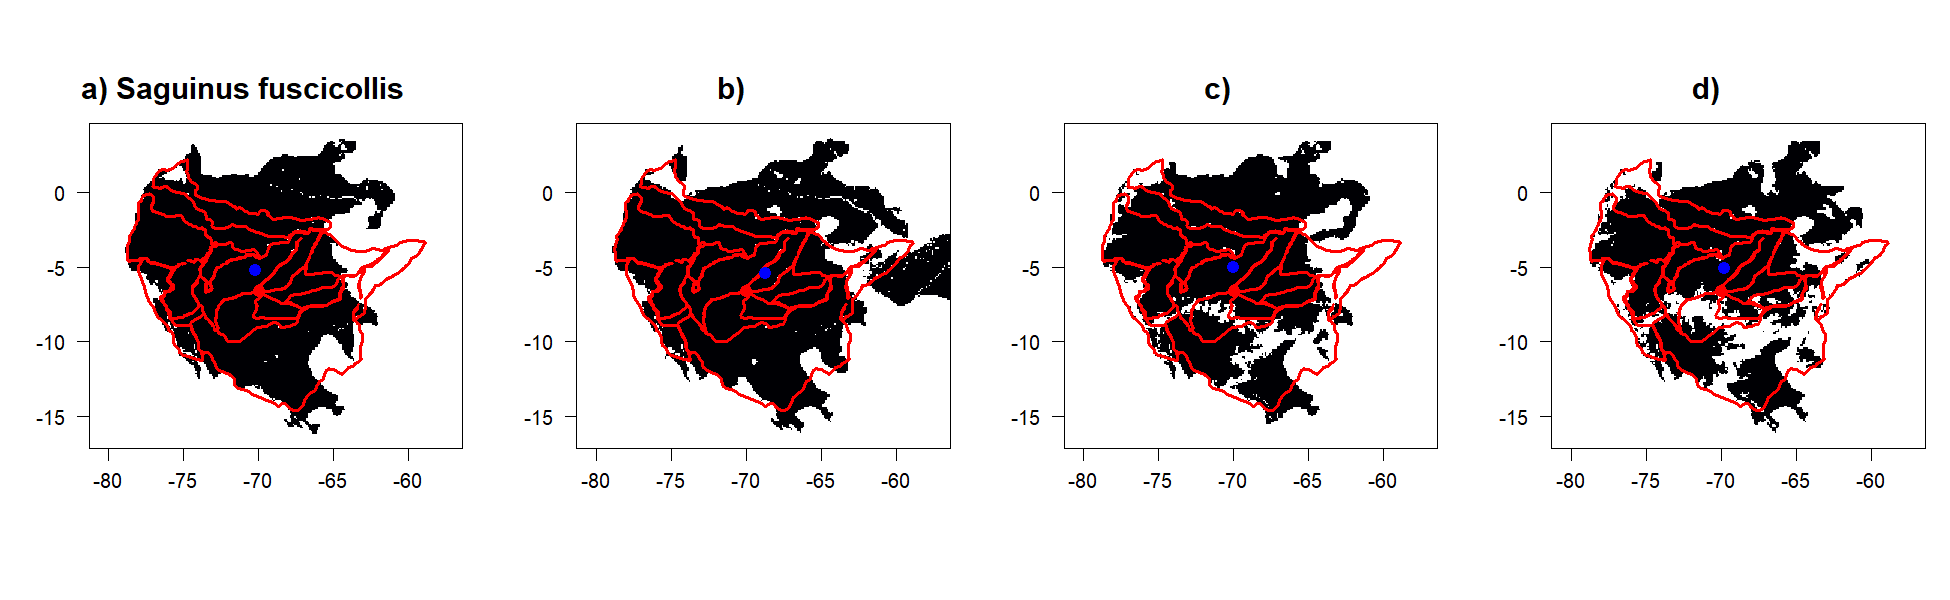

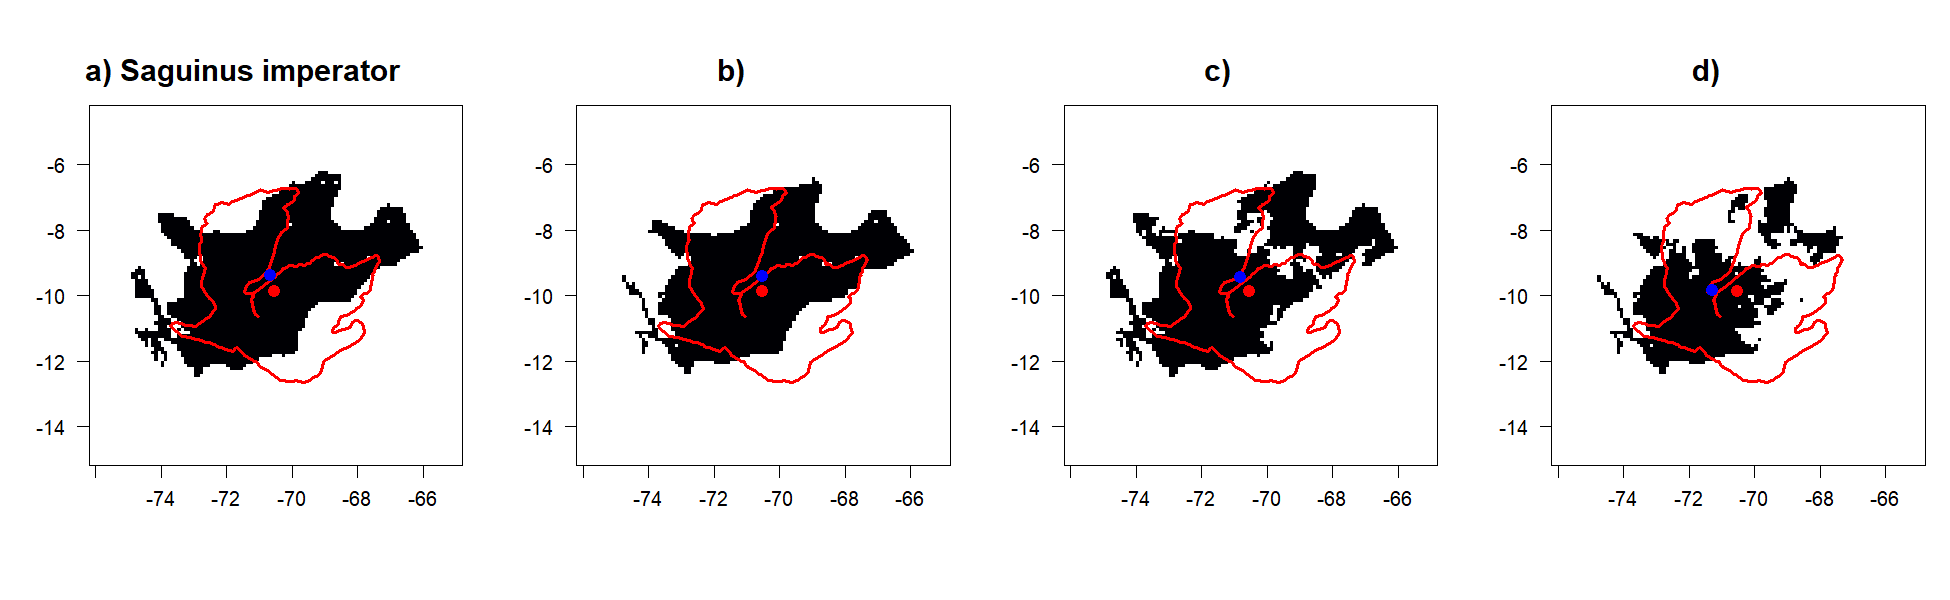

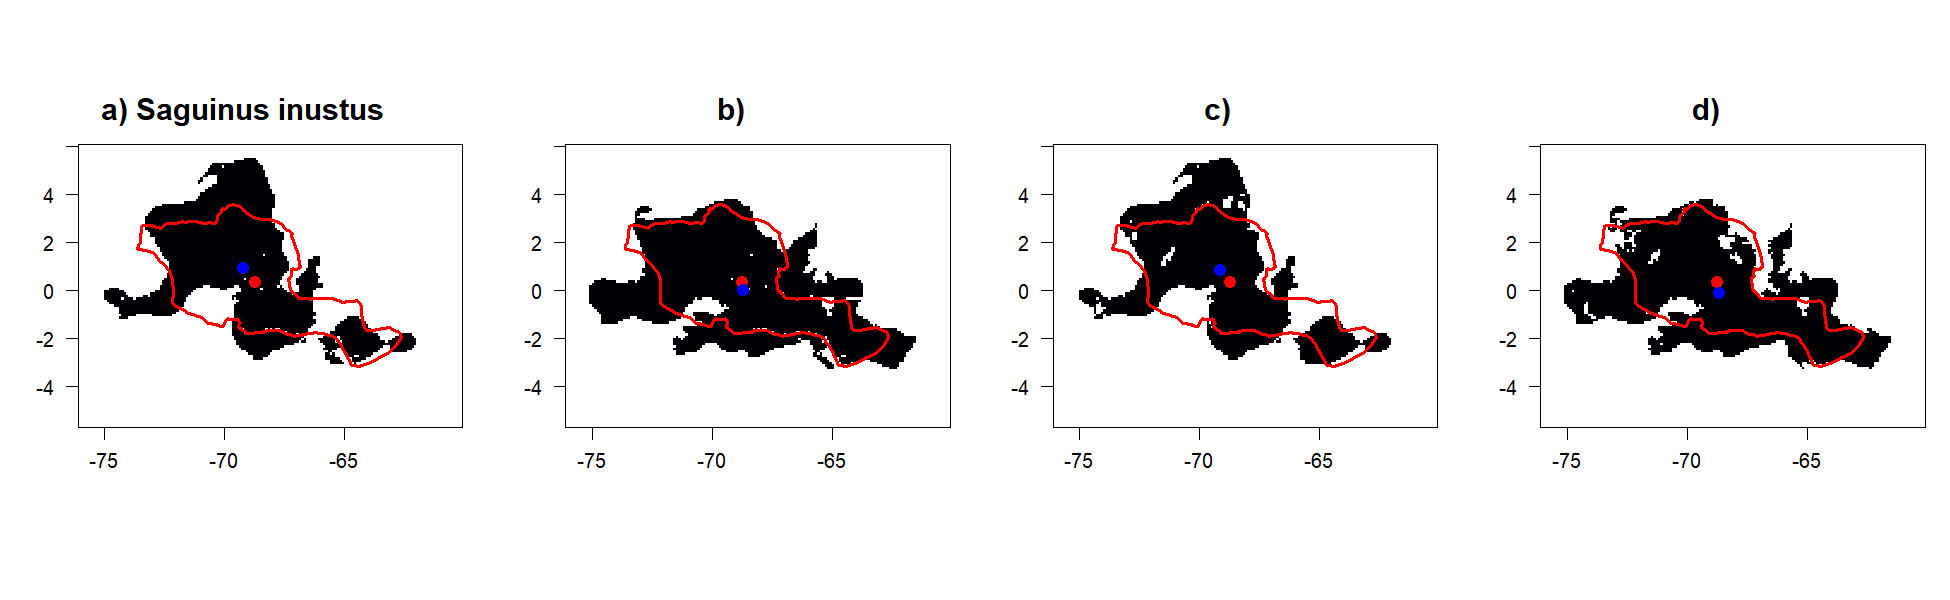

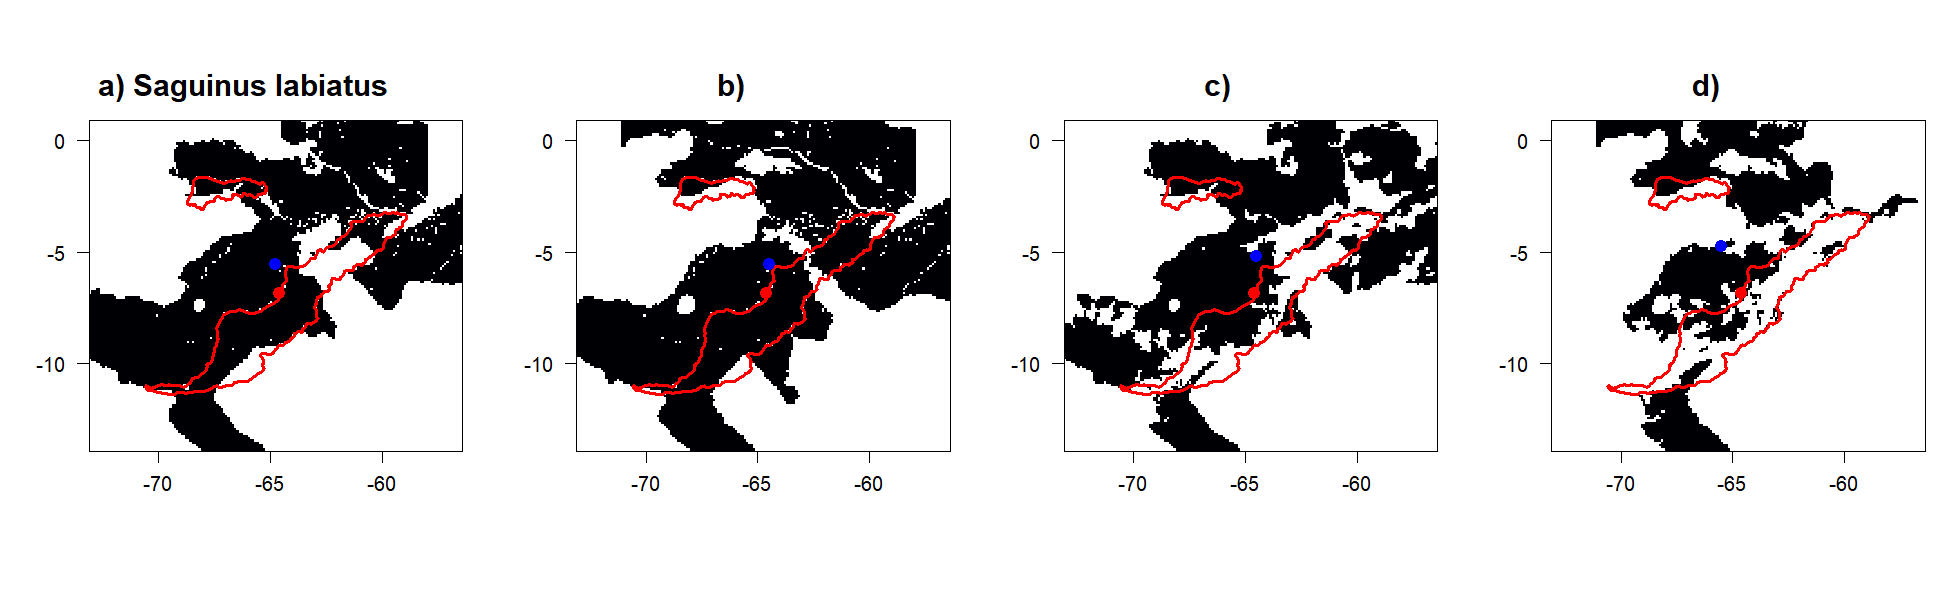

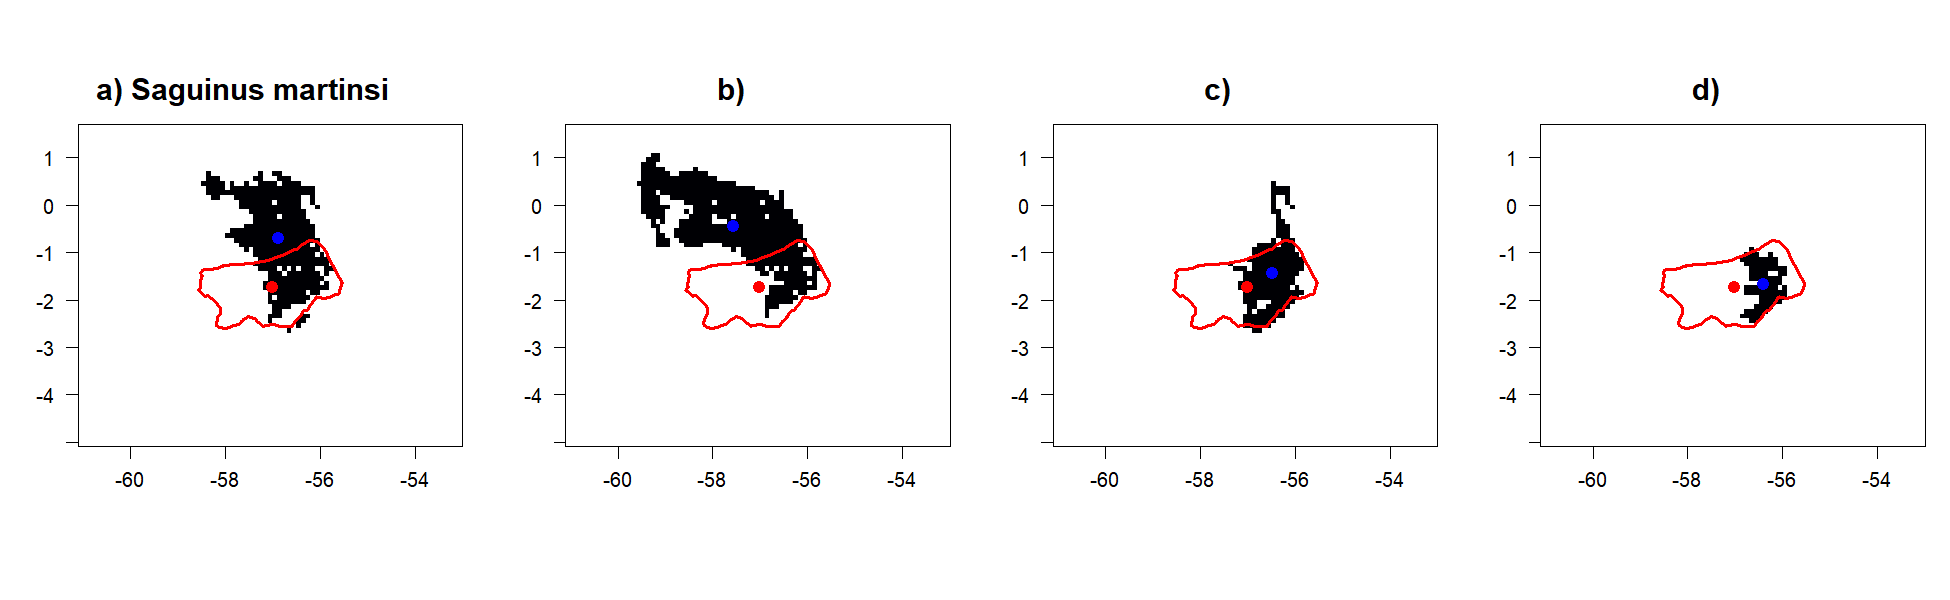

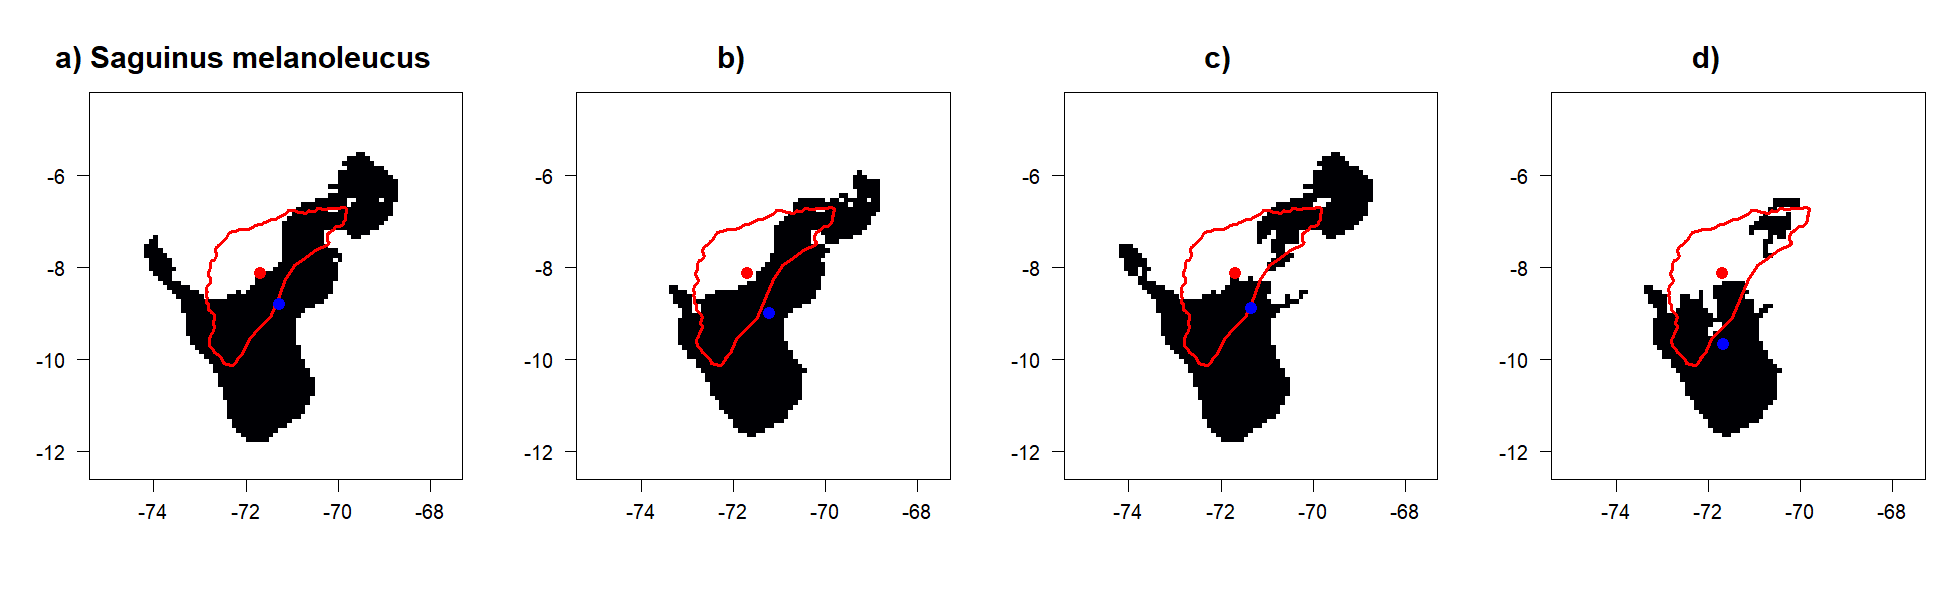

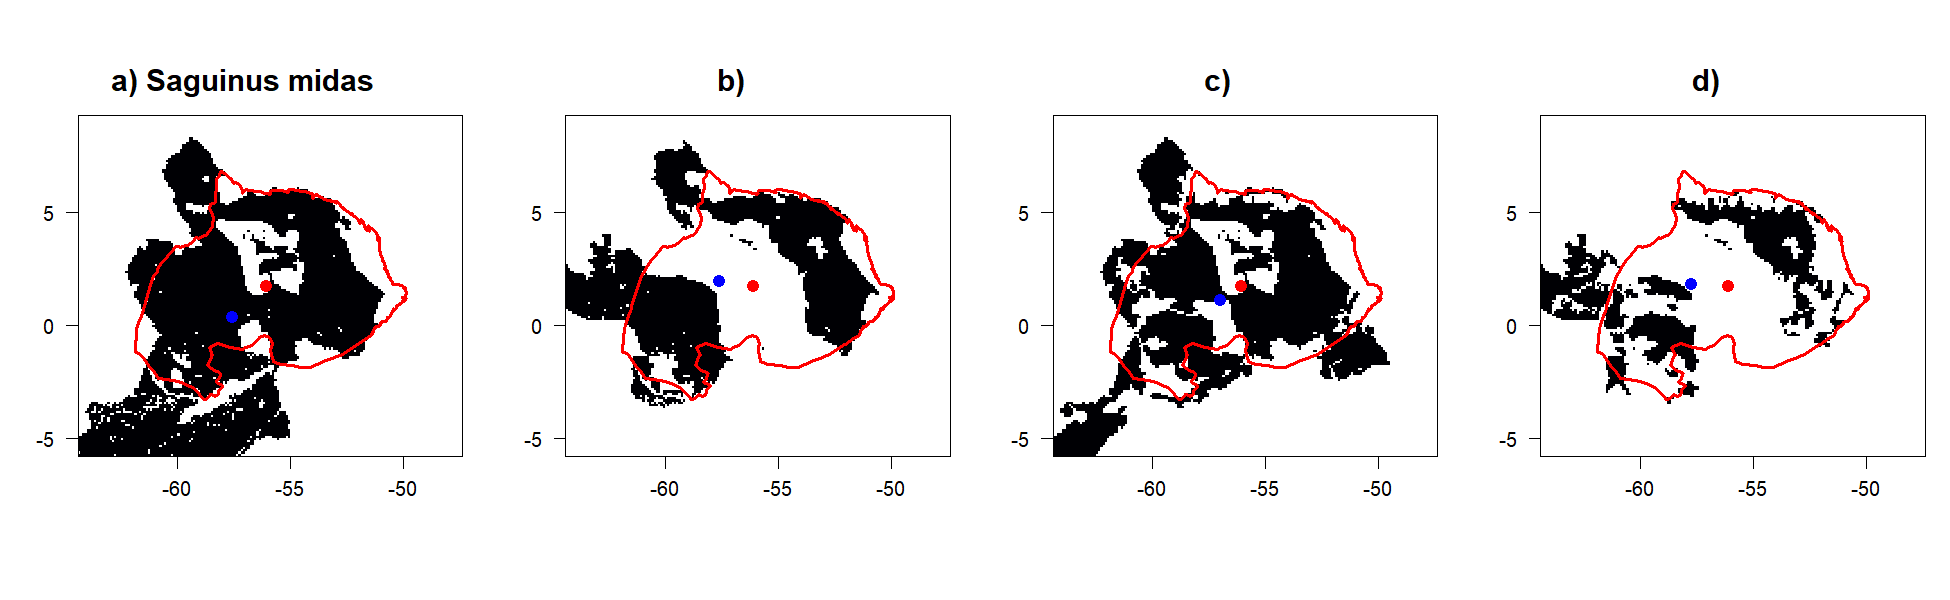

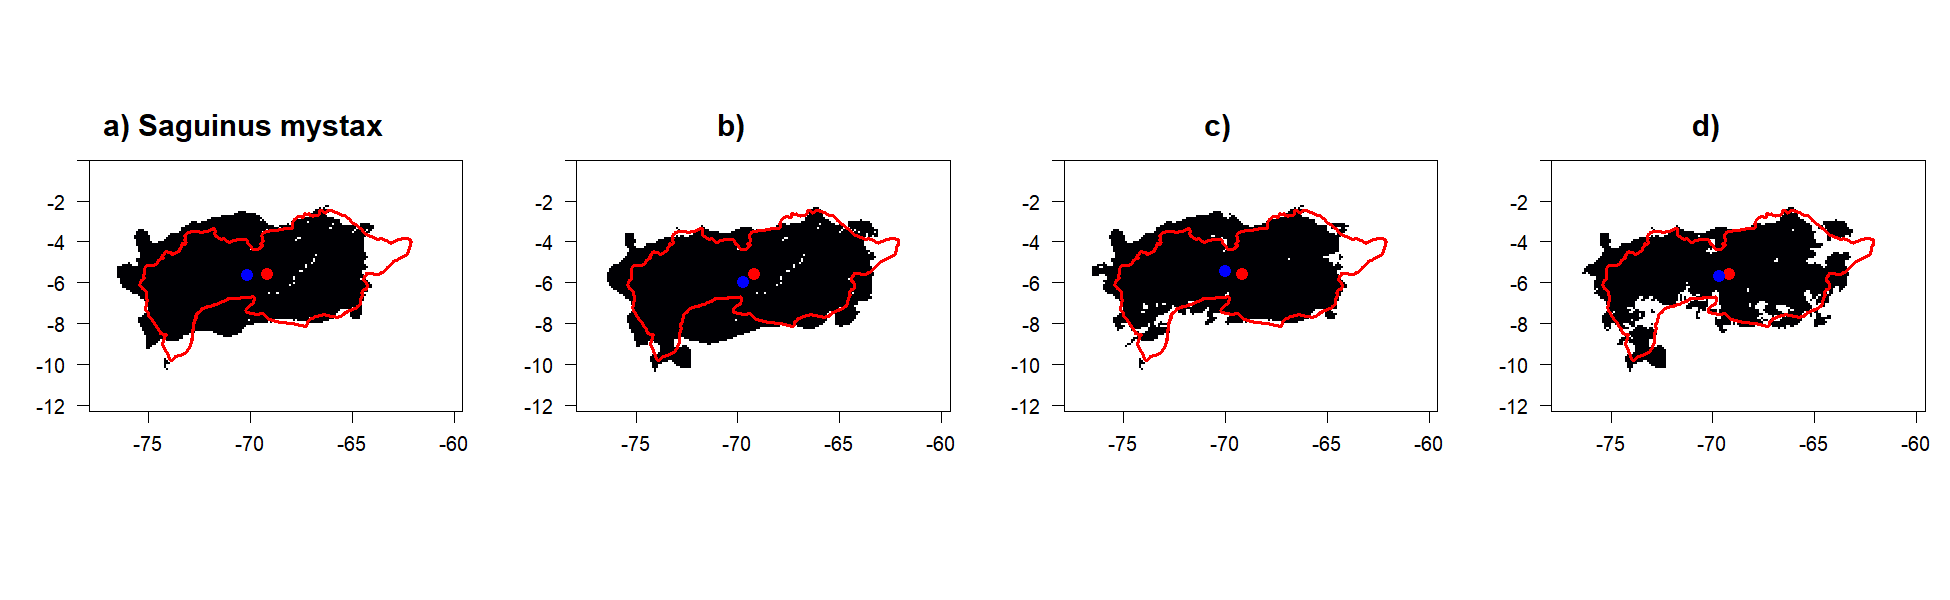

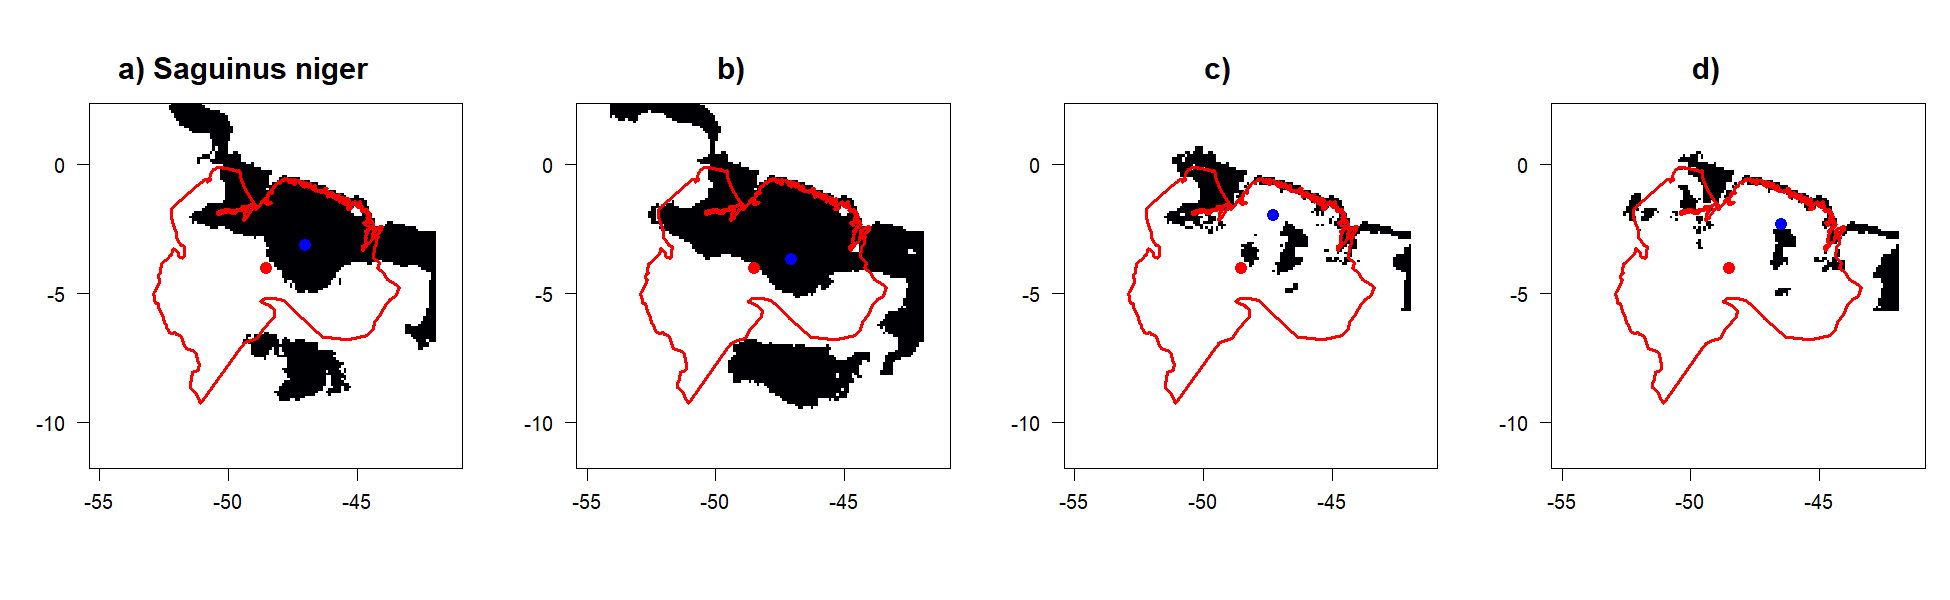

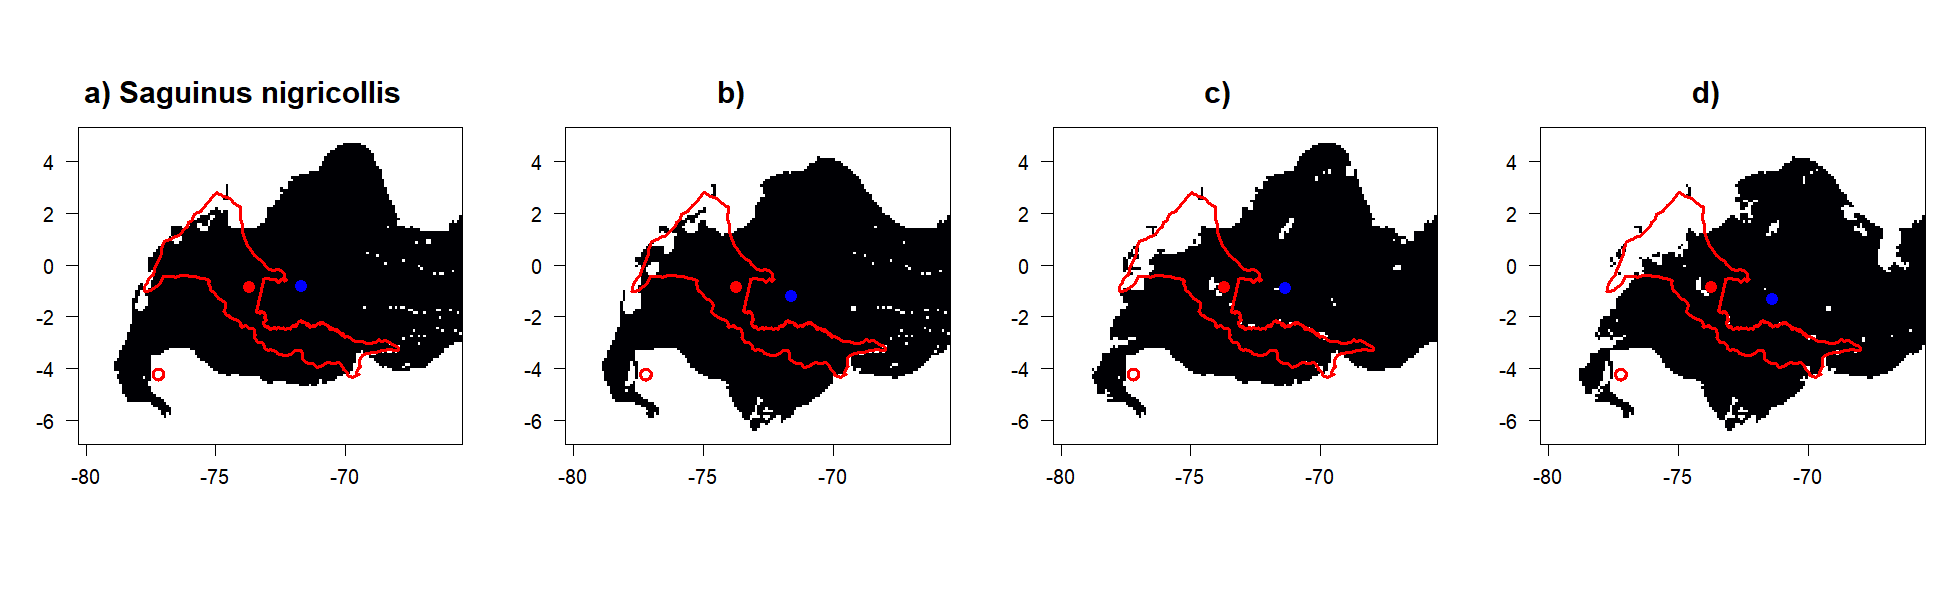

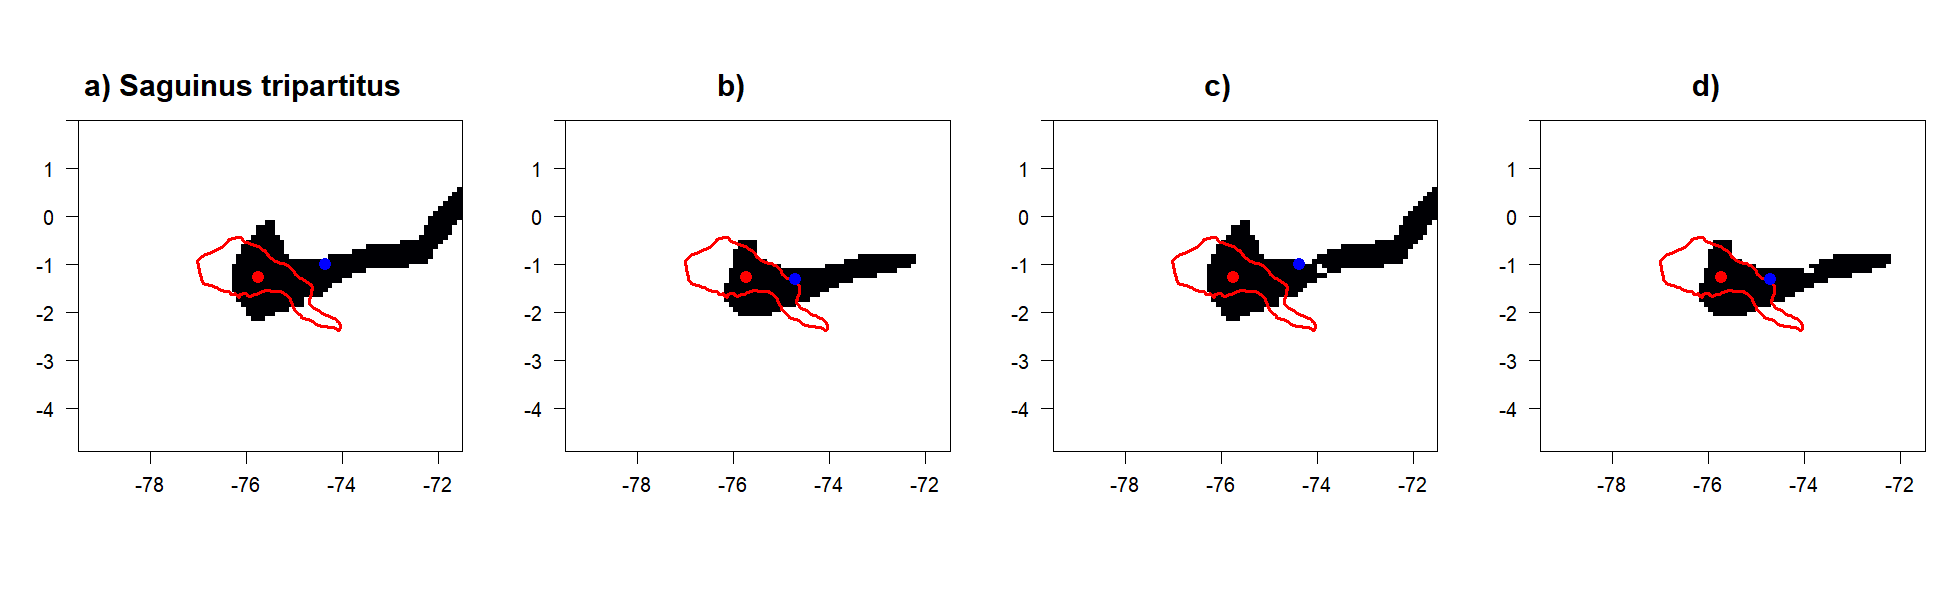

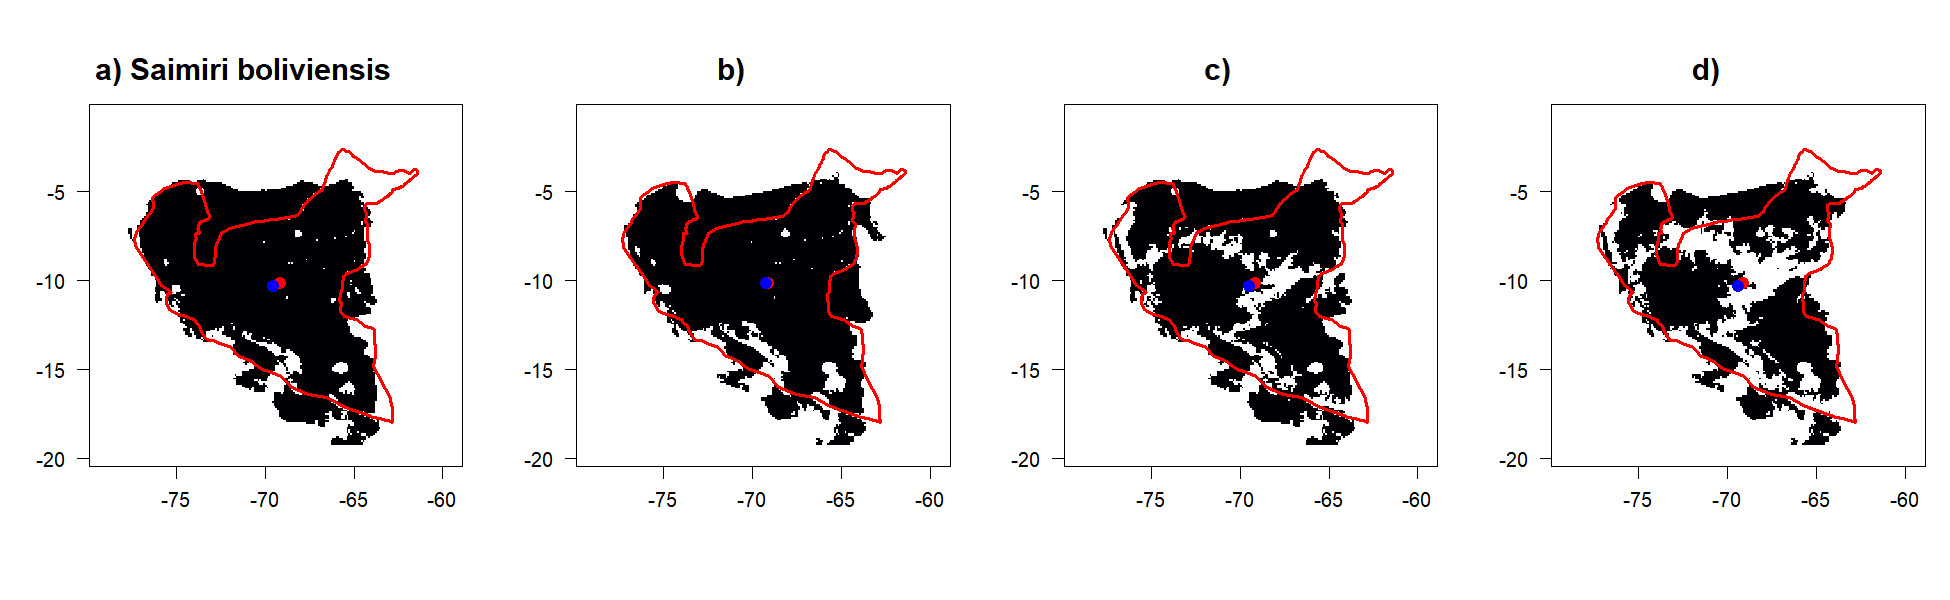

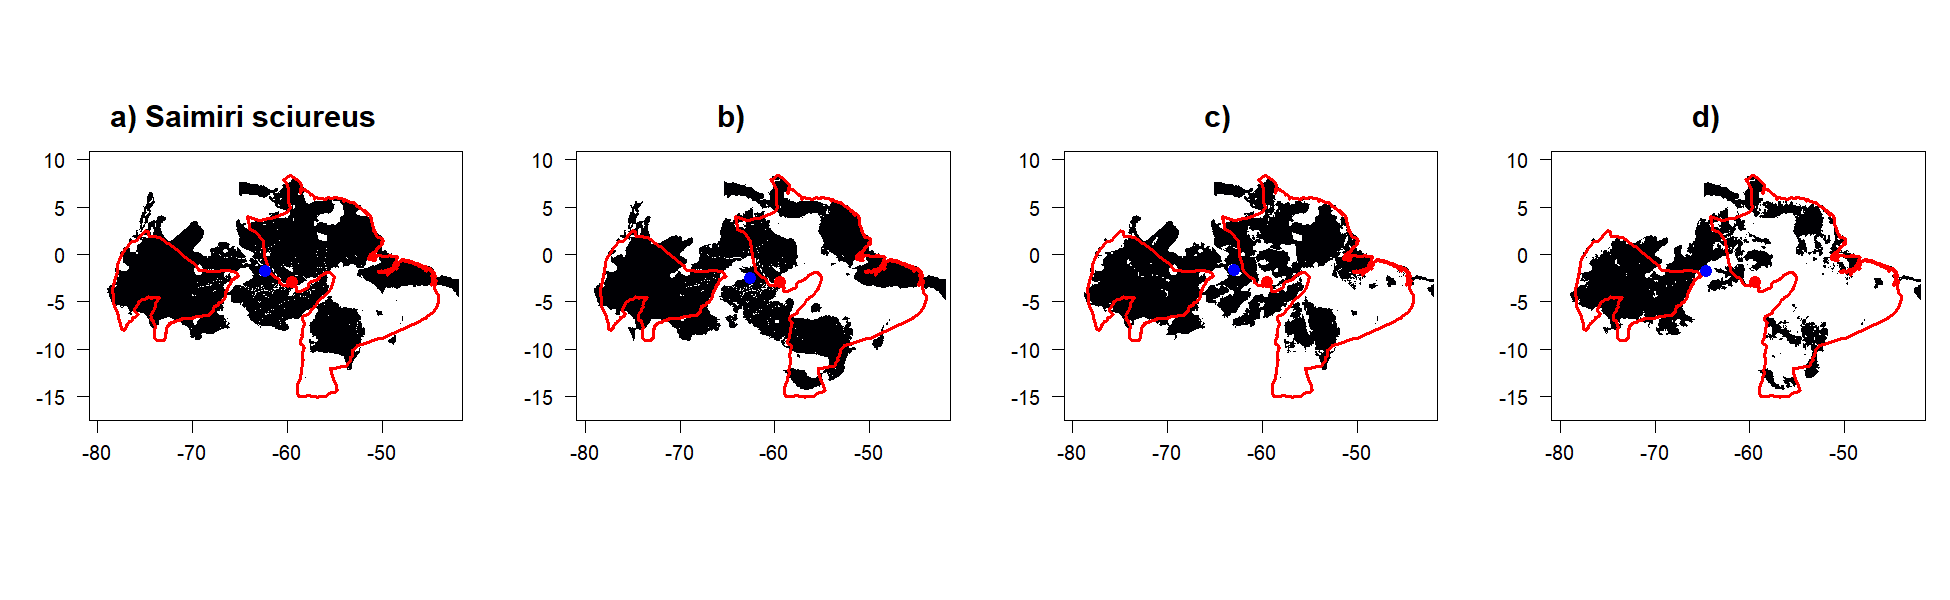

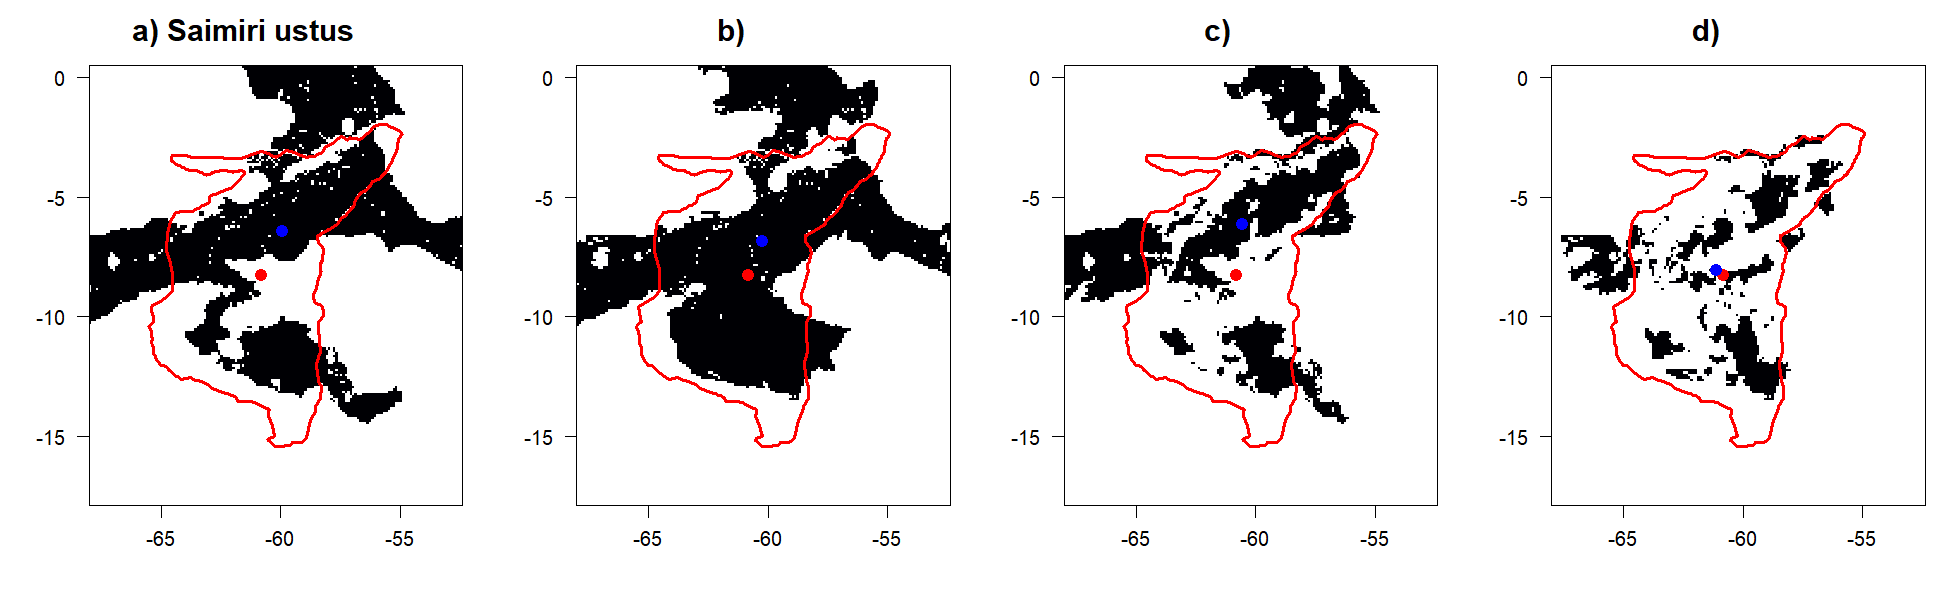

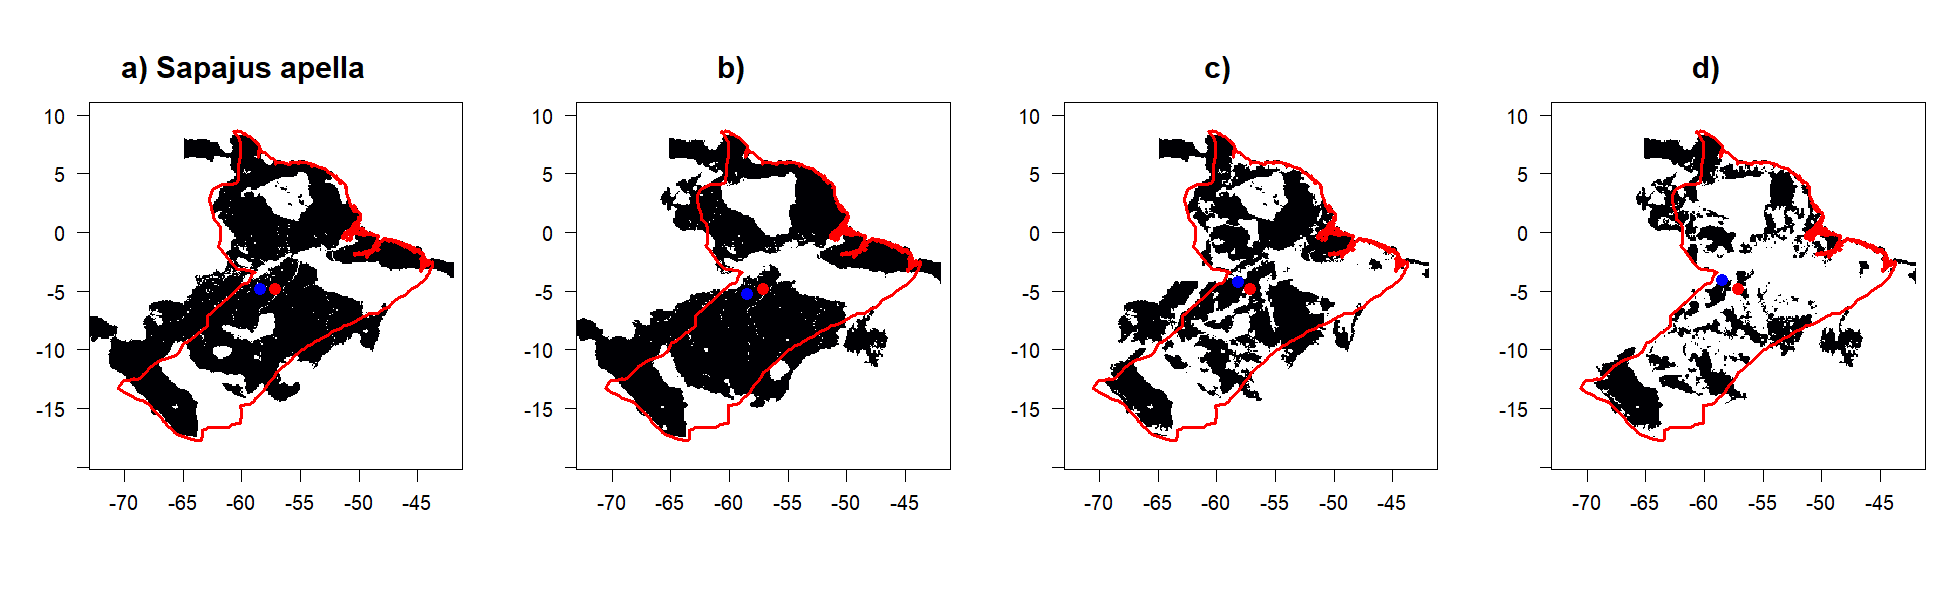


Figure S2 | Potential distribution of Amazon primates and changes on range centroids. Maps are given as binary (threshold-converted) predictions.
